1 **Transmission dynamics and forecasts of the COVID-19 pandemic in Mexico, March 20-**  
2 **November 11, 2020.**

3

4 **Amna Tariq<sup>1</sup>, Juan M. Banda<sup>2</sup>, Pavel Skums<sup>2</sup>, Sushma Dahal<sup>1</sup>, Carlos Castillo-Garsow<sup>3</sup>,**  
5 **Baltazar Espinoza<sup>4</sup>, Noel G. Brizuela<sup>5</sup>, Roberto A. Saenz<sup>6</sup>, Alexander Kirpich<sup>1</sup>, Ruiyan**  
6 **Luo<sup>1</sup>, Anuj Srivastava<sup>7</sup>, Humberto Gutierrez<sup>8</sup>, Nestor Garcia Chan<sup>8</sup>, Ana I. Bento<sup>9</sup>, Maria-**  
7 **Eugenia Jimenez-Corona<sup>10</sup>, Gerardo Chowell<sup>1</sup>**

8

9 <sup>1</sup> Department of Population Health Sciences, School of Public Health, Georgia State University,  
10 Atlanta, GA, USA

11 <sup>2</sup> Department of Computer Science, College of Arts and Sciences, Georgia State University,  
12 Atlanta, GA, USA

13 <sup>3</sup> Department of Mathematics, Eastern Washington University, Cheney, Washington, USA

14 <sup>4</sup> Biocomplexity Institute and Initiative, Network Systems Science and Advanced Computing  
15 Division, University of Virginia, Virginia, USA

16 <sup>5</sup> Scripps Institution of Oceanography, University of California San Diego, La Jolla, CA, USA

17

18 <sup>6</sup> Facultad de Ciencias, Universidad de Colima, Colima, Mexico

19

20 <sup>7</sup> Department of Statistics, Florida State University, Florida, USA

21 <sup>8</sup> Department of Physics, Centro Universitario de Ciencias Exactas e Ingenierias (CUCEI),

22 University of Guadalajara, Guadalajara, Mexico

23 <sup>9</sup> Department of Epidemiology and Biostatistics, School of Public Health, Indiana University

24 Bloomington, Indiana, USA

25 <sup>10</sup> Department of Epidemiology, National Institute of Cardiology "Ignacio Chavez", Mexico City,

26 Mexico

27 \* Corresponding author:

28 Email: [atariq1@student.gsu.edu](mailto:atariq1@student.gsu.edu) (AT)

29

## 30 **Abstract**

31 Mexico has experienced one of the highest COVID-19 death rates in the world. A delayed  
32 response towards implementation of social distancing interventions until late March 2020 and a  
33 phased reopening of the country in June 2020 has facilitated sustained disease transmission in the  
34 region. Here, we systematically generate and compare 30-day ahead forecasts using previously  
35 validated growth models based on mortality trends from the Institute for Health Metrics and  
36 Evaluation for Mexico and Mexico City in near real-time. Moreover, we estimate reproduction  
37 numbers for SARS-CoV-2 based on methods that rely on genomic data as well as case incidence  
38 data. Subsequently, functional data analysis techniques are utilized to analyze the shapes of  
39 COVID-19 growth rate curves at the state level to characterize the spatial-temporal transmission  
40 patterns. The early estimates of reproduction number for Mexico were estimated between  $R \sim 1.1$ -  
41  $1.3$  from genomic and case incidence data. Moreover, the mean estimate of  $R$  has fluctuated  $\sim 1.0$   
42 from late July till end of September 2020. The spatial analysis characterizes the state-level  
43 dynamics of COVID-19 into four groups with distinct epidemic trajectories. We found that the  
44 sequential mortality forecasts from the GLM and Richards model predict downward trends in the  
45 number of deaths for all thirteen forecast periods for Mexico and Mexico City. The sub-  
46 epidemic and IHME models predict more realistic stable trajectory of COVID-19 mortality  
47 trends for the last three forecast periods (09/21-10/21 - 09/28-10/27) for Mexico and Mexico  
48 City. Our findings support the view that phenomenological models are useful tools for short-  
49 term epidemic forecasting albeit forecasts need to be interpreted with caution given the dynamic  
50 implementation and lifting of social distancing measures.

51

## 52 **Introduction**

53 The ongoing COVID-19 (coronavirus disease 2019) pandemic is the most important global  
54 health challenge since the 1918 influenza pandemic [1]. This calls for scientists, health  
55 professionals and policy makers to collaboratively address the challenges posed by this deadly  
56 infectious disease. The causative SARS-CoV-2 (severe acute respiratory syndrome virus 2) is a  
57 novel, unusually complex and highly transmissible virus that spreads via respiratory droplets and  
58 aerosols [2, 3]. It presents a clinical spectrum that ranges from asymptomatic individuals to  
59 conditions that require the use of mechanical ventilation to multiorgan failure and septic shock  
60 leading to death [2]. The ongoing COVID-19 pandemic has not only exerted significant  
61 morbidity but also excruciating mortality burden with more than 79.2 million cases and 1.7  
62 million deaths reported worldwide as of December 29, 2020 [4]. Approximately 27 countries  
63 globally including 9 countries in the Americas have reported more than 10,000 deaths  
64 attributable to SARS-CoV-2 as of December 29, 2020 despite the implementation of social  
65 distancing policies to limit the death toll [5]. In comparison, a total of 774 deaths were reported  
66 during the 2003 SARS multi-country epidemic and 858 deaths were reported during the 2012  
67 MERS epidemic in Saudi Arabia [6, 7].

68  
69 Determining the best containment strategies for COVID-19 pandemic is a highly active research  
70 area [3]. While multiple vaccines against the novel coronavirus have begun to roll out, many  
71 scientific uncertainties exist that will dictate how vaccination campaigns will affect the course of  
72 the pandemic. For instance, it is still unclear if the vaccine will prevent the transmission of  
73 SARS-CoV-2 or just protect against more severe disease outcomes and death [8, 9]. In these  
74 circumstances non-pharmaceutical interventions remain the most promising policy levers to

75 reduce the virus transmission [10]. The epidemiological and mathematical models can help  
76 quantify the effects of these non-pharmaceutical interventions such as wearing facemasks and  
77 social distancing mandates to contain the spread of the virus [11]. However, recent studies have  
78 demonstrated that indicators such as population density, poverty, over-crowding and  
79 inappropriate work place conditions hinder the social distancing interventions propagating the  
80 unmitigated spread of the virus, especially in developing countries [12, 13]. Moreover, the  
81 differential mortality trends are also influenced by the disparate disease burden driven by the  
82 socioeconomic gradients with the poorest areas showing highest preventable mortality rates [14].  
83  
84 Mexico, exhibiting one of the highest COVID-19 mortality impact in the world thus far [15], is a  
85 highly populated country [16] with ~42% of the population living in poverty (defined as the state  
86 if a person or group of people lack a specified amount of money or material possessions) [17]  
87 and ~60% of the population work in the informal sector [18]. In this context, Mexico ranks  
88 fourth in the world in terms of the number of COVID-19 deaths, a tally surpassed only by the  
89 USA, Brazil and India [19] , has reported one of highest death tolls among healthcare workers  
90 (~2500 deaths) [20], and has conducted the lowest number of COVID-19 tests per capita [21].

91  
92 The Mexican Ministry of Health identified three phases of contingency plan: viral importation,  
93 community transmission and epidemic to combat the COVID-19 pandemic in Mexico [22]. The  
94 pandemic was likely seeded by imported COVID-19 cases reported on February 28, 2020 [23,  
95 24]. As the virus spread across the nation in phase one of the pandemic, some universities  
96 switched to virtual classes and some festivals and sporting events were postponed [25].  
97 However, the government initially downplayed the impact of the virus and did not enforce strict

98 social distancing measures [26]. This led to large gatherings at some social events such as  
99 concerts, festivals and soccer tournament amidst sustained disease transmission in the country  
100 [27]. A study conducted in Mexico estimated the early reproduction number for the first ten days  
101 of the epidemic between ~2.9-4.9 [28]. However, the true impact of the pandemic was generally  
102 under-estimated by the Mexican government despite active virus transmission in the country  
103 [29].

104  
105 As local clusters of disease started to appear in the community, phase 2 (community  
106 transmission) of the pandemic was declared on March 24, 2020 [30]. Authorities suspended all  
107 non-essential activities including closure of public and entertainment places and banned  
108 gatherings of more than 100 people [31]. This was followed by the declaration of national  
109 emergency on March 30, 2020. The new measures to fight the virus under the national  
110 emergency included extending the suspension of non-essential activities and a reduction the  
111 number of people who can gather to fifty [32]. However, as the virus paved its way across the  
112 country ravaging through the poor and rural communities, the government urged the public to  
113 comply with the stay-at-home orders [33-35]. These preventive orders from the government were  
114 met with mixed reactions from people belonging to different socio-economic sectors of the  
115 community [36]. Moreover, transportation restrictions to and from the regions most affected by  
116 COVID-19 were not implemented until April 16, 2020 [37]. Shortly after, on April 21, 2020,  
117 Mexico announced phase 3 of the contingency (epidemic phase) as wide-spread community  
118 transmission intensified [38].

119

120 With lockdowns and other restrictions in place, Mexican officials shared model output [39]  
121 predicting that COVID-19 case counts would peak in early May and that the epidemic was  
122 expected to end before July 2020 [40]. Despite notorious disagreement between surveillance data  
123 and government forecasts, these model predictions continued to be cited by official and  
124 independent sources [41, 42]. The extent to which these overly optimistic predictions skewed the  
125 plans and budgets of private and public institutions remains unknown. Under the official  
126 narrative that the pandemic would soon be over, Mexico planned a gradual phased re-opening of  
127 its economy in early June 2020, as the “new normal” phase [43].

128  
129 In Mexico, reopening of the economic activities started on June 1 under a four color traffic light  
130 monitoring system to alert the residents of the epidemiological risks of COVID-19 based on the  
131 level of severity of the pandemic in each state, on a weekly basis [44, 45]. As of December 29,  
132 2020 Mexico exhibits high estimates of cumulative COVID-19 cases and deaths; 1,401,529 and  
133 123,845 respectively [15]. Given the high transmission potential of the virus and limited  
134 application of tests in the country, testing only 24.54 people for every 1000 people (as of  
135 December 28, 2020) [21], estimates of the effective reproduction number from the case  
136 incidence data and near real-time epidemic projections using mortality data could prove to be  
137 highly beneficial to understand the epidemic trajectory of COVID-19. It may also be useful to  
138 assess the effect of intervention strategies such as the stay-at-home orders and mobility patterns  
139 on the epidemic curve and understand the different spatiotemporal dynamics of the virus.

140  
141 In order to investigate the transmission dynamics of the unfolding COVID-19 epidemic in  
142 Mexico, we analyze the case data by date of symptoms onset and death data by date of reporting

143 utilizing mathematical models that are useful to characterize the empirical patterns of epidemics  
144 [46, 47]. We estimate the effective reproduction number of SARS-CoV-2 in Mexico to  
145 understand the transmission dynamics of the virus and examine the mobility trends in relation to  
146 the curve of the number of COVID-19 deaths. Moreover, we employ statistical methods from  
147 functional data analysis to study the shapes of the COVID-19 growth rate curves at the state  
148 level. This helps us characterize the spatial-temporal dynamics of the pandemic based on the  
149 shape features of these curves. Lastly, twitter data demonstrating the frequency of tweets  
150 indicating stay-at-home-order is analyzed in relation to the COVID-19 case counts at the national  
151 level.

152

## 153 **Methods**

### 154 **Data**

155 Five sources of data are analyzed in this manuscript. A brief description of the datasets and their  
156 sources are described below.

#### 157 (i) **IHME data for short term forecasts**

158 We utilized the openly published smoothed trend in daily COVID-19 reported deaths from the  
159 Institute of Health Metrics and Evaluation (IHME) for (i) Mexico (country) and (ii) Mexico City  
160 (capital of Mexico) as of October 9, 2020 to generate the forecasts [48]. IHME smoothed data  
161 estimates (current projection scenario) were utilized as they were corrected for the irregularities  
162 in the daily death data reporting, by averaging model results over the last seven days. As this was  
163 our source of data for prediction modeling, it was chosen for its consistent updates. The  
164 statistical procedure of spline regressions obtained from MR-BRT (“meta-regression—Bayesian,  
165 regularized, trimmed”) smooths the trend in COVID-19 reported deaths as described in ref [10].

166 This data are publicly available from the IHME COVID-19 estimates downloads page [48]. For  
167 this analysis, deaths as reported by the IHME model (current projection scenario as described  
168 ahead) on November 11, 2020 are used as a proxy for actual reported deaths attributed to  
169 COVID-19.

170 **(ii) Apple mobility trends data**

171 Mobility data for Mexico published publicly by Apple’s mobility trends reports was retrieved as  
172 of December 5, 2020 [49]. This aggregated and anonymized data is updated daily and includes  
173 the relative volume of directions requests per country compared to a baseline volume on January  
174 13, 2020. Apple has released the data for the three modes of human mobility: driving, walking  
175 and public transit. The mobility measures are normalized in the range 0-100 for each country at  
176 the beginning of the series, so trends are relative to this baseline.

177 **(iii) Case incidence and genomic data for estimating reproduction number**

178 In order to estimate the reproduction number, we use two different data sources. For estimating  
179 the early reproduction number from the genomic data, 111 SARS-CoV-2 genome samples were  
180 obtained from the “global initiative on sharing avian influenza data” (GISAID) repository  
181 between February 27- May 29, 2020 [50]. For estimating the reproduction number from the case  
182 incidence data (early reproduction number and the instantaneous reproduction number), we  
183 utilized publicly available time series of laboratory-confirmed cases by dates of symptoms onset  
184 which were obtained from the Mexican Ministry of Health as of December 5, 2020 [15].

185 **(iv) Case incidence data for Spatial analysis**

186 We recovered daily case incidence data for all 32 states of Mexico from March 20 to December  
187 5 from the Ministry of Health Mexico, as of December 5, 2020 [15].

188 **(v) Twitter data for twitter analysis**



189 For the twitter data analysis, we retrieved data from the publicly available twitter data set of  
190 COVID-19 chatter from March 12 to November 11, 2020 [51].

191

## 192 **Modeling framework for forecast generation**

193 We harness three dynamic phenomenological growth models previously applied to multiple  
194 infectious diseases (e.g., SARS, foot and mouth disease, Ebola [52, 53] and the current COVID-  
195 19 outbreak [54, 55]) for mortality modeling and short-term forecasting in Mexico and Mexico  
196 City. These models include the simple scalar differential equation models such as the generalized  
197 logistic growth model [53] and the Richards growth model [56]. We also utilize the sub-  
198 epidemic wave model [52] which accommodates complex epidemic trajectories by assembling  
199 the contribution of multiple overlapping sub-epidemic waves. The mortality forecasts obtained  
200 from these mathematical models can provide valuable insights on the disease transmission  
201 mechanisms, the efficacy of intervention strategies and help evaluate optimal resource allocation  
202 procedures to inform public health policies. The COVID-19 mortality forecasts for Mexico and  
203 Mexico City generated by IHME (current projections scenario) are used as a benchmark model.  
204 The description of these models is provided in the supplemental file.

205

206 Cumulative mortality forecasts obtained from our phenomenological growth models are  
207 compared with the total mean smoothed death data estimates retrieved from the IHME reference  
208 scenario and two IHME counterfactual scenarios. The IHME reference scenario depicts the  
209 “current projection”, which assumes that the social distancing measures are re-imposed for six  
210 weeks whenever daily deaths reach eight per million. The second scenario “mandates easing”  
211 implies what would happen if the government continues to ease social distancing measures

212 without re-imposition. Lastly, the third scenario, “universal masks” accounts for universal  
213 facemask wearing, that reflects 95% facemask usage in public and social distancing mandates  
214 reimposed at 8 deaths per million. Detailed description of these modeling scenarios and their  
215 assumptions is explained in ref. [10]. Moreover, the total mean smoothed death data estimates  
216 reported by IHME reference scenario as of November 11, 2020 are considered as a proxy for  
217 actual death count for each forecasting period.

218

### 219 **Model calibration and forecasting approach**

220 We conducted 30-day ahead short-term forecasts utilizing thirteen data sets spanned over a  
221 period of four months (July 4-October 9, 2020) (Table 1). Each forecast was fitted to the daily  
222 death counts from the IHME smoothed data estimates reported between March 20-September 27,  
223 2020 for (i) Mexico and (ii) Mexico City. The first model calibration process relies on fifteen  
224 weeks of data, from March 20-July 4, 2020. Sequentially models are recalibrated each week with  
225 the most up-to-date data, meaning the length of the calibration period increases by one week up  
226 to August 2, 2020. However, owing to irregular publishing of data estimates by the IHME, the  
227 length of calibration period increased by 2 weeks after August 2, 2020. This was followed by a  
228 one week increase from August 17-September 27, 2020 as the data estimates were again  
229 published every week.

230

231 Table 1: Characteristics of the data sets used for the sequential calibration and forecasting of the  
232 COVID-19 epidemic in Mexico and Mexico City (2020).

| Date of the retrieval of data set | Calibration period for the GLM, sub-epidemic, Richards and IHME model | Calibration period (number of days) | Forecast period for the GLM, sub-epidemic, Richards and IHME model |
|-----------------------------------|-----------------------------------------------------------------------|-------------------------------------|--------------------------------------------------------------------|
| 07/04                             | 03/20-07/04                                                           | 107                                 | 07/05-08/03                                                        |
| 07/10                             | 03/20-07/11                                                           | 114                                 | 07/12-08/10                                                        |
| 07/17                             | 03/20-07/17                                                           | 120                                 | 07/18-08/16                                                        |
| 07/27                             | 03/20-07/25                                                           | 128                                 | 07/26-08/24                                                        |
| 08/06                             | 03/20-08/02                                                           | 136                                 | 08/03-09/01                                                        |
| 08/22                             | 03/20-08/17                                                           | 151                                 | 08/18-09/16                                                        |
| 08/27                             | 03/20-08/22                                                           | 156                                 | 08/23-09/21                                                        |
| 09/02                             | 03/20-08/30                                                           | 164                                 | 08/31-09/30                                                        |
| 09/11                             | 03/20-09/07                                                           | 172                                 | 09/08-10/08                                                        |
| 09/18                             | 03/20-09/13                                                           | 179                                 | 09/14-10/13                                                        |
| 09/24                             | 03/20-09/20                                                           | 185                                 | 09/21-10/21                                                        |
| 10/02                             | 03/20-09/27                                                           | 193                                 | 09/28-10/27                                                        |
| 10/09                             | 03/20-09/27                                                           | 193                                 | 09/28-10/27                                                        |

233  
234

235 The 30-day ahead short-term forecasts generated by calibrating our three phenomenological  
236 growth models with the IHME smoothed death data estimates are compared with the forecasts  
237 generated by the IHME reference scenario for the same calibration and forecasting periods.

238

239 For each of the three models; GLM, Richards growth model and the sub-epidemic wave model,  
240 we estimate the best fit solution for each model using non-linear least square fitting procedure  
241 [57]. This process minimizes the sum of squared errors between the model fit,  $f(t, \hat{\Theta})$  and the

242 smoothed data estimates,  $y_t$  and yields the best set of parameter estimates  $\Theta = (\theta_1, \theta_2, \dots, \theta_m)$ .  
243 The parameters  $\hat{\Theta} = \underset{\Theta}{\operatorname{argmin}} \sum_{t=1}^n (f(t, \Theta) - y_t)^2$  define the best fit model  $f(t, \theta)$ . Here  
244  $\hat{\Theta} = (r, p, k_0, q \text{ and } C_{thr})$  corresponds to the set of parameters of the sub-epidemic model,  
245  $\hat{\Theta} = (r, k_0, a)$  corresponds to set of parameters of the Richards model and  $\hat{\Theta} = (r, p, k_0)$   
246 corresponds to the set of parameters of the GLM model [58]. For the GLM and sub-epidemic  
247 wave model, we provide initial best guesses of the parameter estimates. However, for the  
248 Richards growth model we initialize the parameters for the nonlinear least squares' method [57]  
249 over a wide range of plausible parameters from a uniform distribution using Latin hypercube  
250 sampling [59]. This allows us to test the uniqueness of the best fit model. Moreover, the initial  
251 conditions are set at the first data point for each of the three models [58]. Uncertainty bounds  
252 around the best-fit solution are generated using parametric bootstrap approach with replacement  
253 of data assuming a Poisson error structure for the GLM and sub-epidemic model. A negative  
254 binomial error structure was used to generate the uncertainty bounds of the Richards growth  
255 model; where we assume the mean to be three times the variance based on the noise in the data.  
256 Detailed description of this method is provided in ref [58].  
257  
258 Each of the M best-fit parameter sets are used to construct the 95% confidence intervals for each  
259 parameter by refitting the models to each of the M = 300 datasets generated by the bootstrap  
260 approach during the calibration phase. Further, each M best fit model solution is used to generate  
261 m= 30 additional simulations with Poisson error structure for GLM and sub-epidemic model and  
262 negative binomial error structure for Richards model extended through a 30-day forecasting  
263 period. For the forecasting period, we construct the 95% prediction intervals with these 9000 (M

264  $\times m$ ) curves. Detailed description of the methods of parameter estimation can be found in  
265 references [58, 60, 61]

266

### 267 **Performance metrics**

268 We utilized the following four performance metrics to assess the quality of our model fit and the  
269 30-day ahead short term forecasts: the mean absolute error (MAE) [62], the mean squared error  
270 (MSE) [63], the coverage of the 95% prediction intervals [63], and the mean interval score (MIS)  
271 [63] for each of the three models: GLM, Richards model and the sub-epidemic model. For  
272 calibration performance, we compare the model fit to the observed smoothed death data  
273 estimates fitted to the model, whereas for the performance of forecasts, we compare our forecasts  
274 with the smoothed death data estimates (current projections scenario) reported on November 11,  
275 2020 for the time period of the forecast.

276 The mean squared error (MSE) and the mean absolute error (MAE) assess the average deviations  
277 of the model fit to the observed death data. The mean absolute error (MAE) is given by:

$$MAE = \frac{1}{n} \sum_{i=1}^n |f(t_i, \hat{\Theta}) - y_{t_i}|$$

278 The mean squared error (MSE) is given by:

279

$$MSE = \frac{1}{n} \sum_{i=1}^n (f(t_i, \hat{\Theta}) - y_{t_i})^2$$

280 where  $y_{t_i}$  is the time series of reported smoothed death estimates,  $t_i$  is the time stamp and  $\hat{\Theta}$  is the  
281 set of model parameters. For the calibration period,  $n$  equals the number of data points used for  
282 calibration, and for the forecasting period,  $n = 30$  for the 30-day ahead short-term forecast.

283  
284 Moreover, in order to assess the model uncertainty and performance of prediction interval, we  
285 use the 95% PI and MIS. The prediction coverage is defined as the proportion of observations  
286 that fall within 95% prediction interval and is calculated as:

$$PI\ coverage = \frac{1}{n} \sum_{t=1}^n I\{Y_t > L_t \cap Y_t < U_t\}$$

287 where  $Y_t$  are the smoothed death data estimates,  $L_t$  and  $U_t$  are the lower and upper bounds of the  
288 95% prediction intervals, respectively,  $n$  is the length of the period, and  $I$  is an indicator variable  
289 that equals 1 if value of  $Y_t$  is in the specified interval and 0 otherwise

290  
291 The mean interval score addresses the width of the prediction interval as well as the coverage.  
292 The mean interval score (MIS) is given by:

$$MIS = \frac{1}{n} \sum_{i=1}^n (U_{t_i} - L_{t_i}) + \frac{2}{0.05} (L_{t_i} - y_{t_i}) I\{y_{t_i} < L_{t_i}\} + \frac{2}{0.05} (U_{t_i} - y_{t_i}) I\{y_{t_i} > U_{t_i}\}$$

294  
295 In this equation  $L_t$ ,  $U_t$ ,  $n$  and  $I$  are as specified above for PI coverage. Therefore, if the PI  
296 coverage is 1, the MIS is the average width of the interval across each time point. For two  
297 models that have an equivalent PI coverage, a lower value of MIS indicates narrower intervals  
298 [63].

299

### 300 **Mobility data analysis**

301 In order to analyze the time series data for Mexico from March 20-December 5, 2020 for three  
302 modes of mobility; driving, walking and public transport, we utilize the R code developed by  
303 Kieran Healy [64]. We analyze the mobility trends to look for any pattern in sync with the  
304 mortality curve of COVID-19. The time series for mobility requests is decomposed into trends,  
305 weekly and remainder components. The trend is a locally weighted regression fitted to the data  
306 and remainder is any residual left over on any given day after the underlying trend and normal  
307 daily fluctuations have been accounted for.

308

### 309 **Reproduction number**

310 We estimate the reproduction number,  $R_t$ , for the early ascending phase of the COVID-19  
311 epidemic in Mexico and the instantaneous reproduction number  $R_t$  throughout the epidemic.  
312 Reproduction number,  $R_t$ , is a crucial parameter that characterizes the average number of  
313 secondary cases generated by a primary case at calendar time  $t$  during the outbreak. This  
314 quantity is critical to identify the magnitude of public health interventions required to contain an  
315 epidemic [65-67]. Estimates of  $R_t$  indicate if widespread disease transmission continues ( $R_t > 1$ )  
316 or disease transmission declines ( $R_t < 1$ ). Therefore, in order to contain an outbreak, it is vital to  
317 maintain  $R_t < 1$ .

318

319 **Estimating the reproduction number,  $R_t$ , from case incidence using generalized growth**  
320 **model (GGM).**

321 We estimate the reproduction number by calibrating the GGM (as described in the supplemental  
322 file) to the early growth phase of the epidemic (February 27-May 29, 2020) [68]. The generation  
323 interval of SARS-CoV-2 is modeled assuming gamma distribution with a mean of 5.2 days and a  
324 standard deviation of 1.72 days [69]. We estimate the growth rate parameter  $r$ , and the  
325 deceleration of growth parameter  $p$ , as described in the supplemental file. The GGM model is  
326 used to simulate the progression of local incidence cases  $I_i$  at calendar time  $t_i$ . This is followed  
327 by the application of the discretized probability distribution of the generation interval, denoted  
328 by  $\rho_i$ , to the renewal equation to estimate the reproduction number at time  $t_i$  [70-72]:

329

$$R_{t_i} = \frac{I_i}{\sum_{j=0}^i (I_{i-j} \rho_j)}$$

330

331 The numerator represents the total new cases  $I_i$ , and the denominator represents the total number  
332 of cases that contribute (as primary cases) to generating the new cases  $I_i$  (as secondary cases) at  
333 time  $t_i$ . This way,  $R_t$ , represents the average number of secondary cases generated by a single  
334 case at calendar time  $t$ . The uncertainty bounds around the curve of  $R_t$  are derived directly from  
335 the uncertainty associated with the parameter estimates ( $r$ ,  $p$ ) obtained from the GGM. We  
336 estimate  $R_t$  for 300 simulated curves assuming a negative binomial error structure [58].

337

338 **Instantaneous reproduction number  $R_t$ , using the Cori method.**



339 The instantaneous  $R_t$  is estimated by the ratio of number of new infections generated at calendar  
340 time  $t$  ( $I_t$ ), to the total infectiousness of infected individuals at time  $t$  given by  $\sum_{s=1}^t I_{t-s} w_s$  [73,  
341 74]. Hence  $R_t$  can be written as:

$$R_t = \frac{I_t}{\sum_{s=1}^t I_{t-s} w_s}$$

342  
343 In this equation,  $I_t$  is the number of new infections on day  $t$  and  $w_s$  represents the infectivity  
344 function, which is the infectivity profile of the infected individual. This is dependent on the time  
345 since infection ( $s$ ), but is independent of the calendar time ( $t$ ) [75, 76].

346  
347 The term  $\sum_{s=1}^t I_{t-s} w_s$  describes the sum of infection incidence up to time step  $t - 1$ , weighted by  
348 the infectivity function  $w_s$ . The distribution of the generation time can be applied to approximate  
349  $w_s$ , however, since the time of infection is a rarely observed event, measuring the distribution of  
350 generation time becomes difficult [73]. Therefore, the time of symptom onset is usually used to  
351 estimate the distribution of serial interval (SI), which is defined as the time interval between the  
352 dates of symptom onset among two successive cases in a disease transmission chain [77].

353  
354 The infectiousness of a case is a function of the time since infection, which is proportional to  $w_s$   
355 if the timing of infection in the primary case is set as time zero of  $w_s$  and we assume that the  
356 generation interval equals the SI. The SI was assumed to follow a gamma distribution with a  
357 mean of 5.2 days and a standard deviation of 1.72 days [69]. Analytical estimates of  $R_t$  were  
358 obtained within a Bayesian framework using EpiEstim R package in R language [77].  $R_t$  was  
359 estimated at weekly intervals. We reported the median and 95% credible interval (CrI).

360

361 **Estimating the reproduction number,  $R$ , from the genomic analysis.**

362 In order to estimate the reproduction number for the SARS-CoV-2 between February 27- May  
363 29, 2020, from the genomic data, 111 SARS-CoV-2 genomes sampled from infected patients  
364 from Mexico and their sampling times were obtained from GISAID repository [50]. Short  
365 sequences and sequences with significant number of gaps and non-identified nucleotides were  
366 removed, yielding 83 high-quality sequences. For clustering, they were complemented by  
367 sequences from other geographical regions, down sampled to  $n=4325$  representative sequences.  
368 We used the sequence subsample from Nextstrain ([www.nextstrain.org](http://www.nextstrain.org)) global analysis as of  
369 August 15, 2020. These sequences were aligned to the reference genome taken from the  
370 literature [78] using MUSCLE [79] and trimmed to the same length of 29772 bp. The maximum  
371 likelihood phylogeny has been constructed using RAxML[80]

372  
373 The largest Mexican cluster that possibly corresponds to within-country transmissions has been  
374 identified using hierarchical clustering of sequences. The phylodynamics analysis of that cluster  
375 have been carried out using BEAST v1.10.4 [81]. We used strict molecular clock and the tree  
376 prior with exponential growth coalescent. Markov Chain Monte Carlo sampling has been run for  
377 10,000,000 iterations, and the parameters were sampled every 1000 iterations. The exponential  
378 growth rate  $f$  estimated by BEAST was used to calculate the reproductive number  $R$ . For that,  
379 we utilized the standard assumption that SARS-CoV-2 generation intervals (times between  
380 infection and onward transmission) are gamma-distributed [82]. In that case  $R$  can be estimated

381 as  $R = \left(1 + \frac{f\sigma^2}{\mu}\right) \frac{\mu^2}{\sigma^2}$ , where  $\mu$  and  $\sigma$  are the mean and standard deviation of that gamma  
382 distribution. Their values were taken from ref [69].

383

384 **Spatial analysis.**

385 For the shape analysis of incidence rate curves we followed ref. [83] to pre-process the daily  
386 cumulative COVID-19 case data at state level as follows:

387 a) Time differencing: If  $f_i(t)$  denotes the given cumulative number of confirmed cases for  
388 state  $i$  on day  $t$ , then per day growth rate at time  $t$  is given by  $g_i(t) = f_i(t) - f_i(t - 1)$ .

389 b) Smoothing: We then smooth the normalized curves using smooth function in Matlab.

390 c) Rescaling: Rescaling of each curve is done by dividing each  $g_i$  by the total confirmed  
391 cases for a state  $i$ . That is, compute  $h_i(t) = g_i(t)/r_i$ , where  $r_i = \sum_t g_i(t)$ .

392 To identify the clusters by comparing the curves, we used a simple metric. For any two  
393 rate curves,  $h_i$  and  $h_j$ , we compute the norm  $\|h_i - h_j\|$ , where the double bars denote the  $L^2$

394 norm of the difference function, i.e.,  $\|h_i - h_j\| = \sqrt{\sum_t (h_i(t) - h_j(t))^2}$ .

395 This process is depicted in S17 Fig. To identify the clusters by comparing the curves, we used a  
396 simple metric. For any two rate curves,  $h_i$  and  $h_j$ , we compute the norm  $\|h_i - h_j\|$ , where the  
397 double bars denote the  $L^2$  norm of the difference function, i.e.,  $\|h_i - h_j\| =$

398  $\sqrt{\sum_t (h_i(t) - h_j(t))^2}$ . To perform clustering of 32 curves into smaller groups, we apply the

399 dendrogram function in Matlab using the “ward” linkage as explained in ref [84]. The number of  
400 clusters is decided empirically based on the display of overall clustering results. After clustering  
401 the states into different groups, we derived average curve for each cluster after using a time  
402 wrapping algorithm as performed in refs [84, 85].

403

404 **Twitter data analysis.**

405 To observe any relationship between the COVID-19 cases by date of symptoms onset and the  
406 frequency of tweets indicating stay-at-home orders we used a public dataset of 698 million  
407 tweets of COVID-19 chatter [51]. The frequency of tweets indicating stay-at-home order is used  
408 to gauge the compliance of people with the orders of staying at home to avoid spread of the virus  
409 by maintaining social distance. Tweets indicate the magnitude of the people being pro-lockdown  
410 and depict how these numbers have dwindled over the course of the pandemic. To get to the  
411 plotted data, we removed all retweets and tweets not in the Spanish language. We also filtered by  
412 the following hashtags: #quedateencasa, and #trabajardesdecasa, which are two of the most used  
413 hashtags when users refer to the COVID-19 pandemic and their engagement with health  
414 measures. Lastly, we limited the tweets to the ones that originated from Mexico, via its 2-code  
415 country code: MX. A set of 521,359 unique tweets were gathered from March 12 to November  
416 11, 2020. We then overlay the curve of tweets over the epi-curve in Mexico to observe any  
417 relation between the shape of the epidemic trajectory and the shape of curve for the frequency of  
418 tweets during the established time period. We also estimate the correlation coefficient between  
419 the cases and frequency of tweets.

420

## 421 **Results**

422 As of November 11, 2020, Mexico has reported 105,656 deaths whereas Mexico City has  
423 reported 15,742 deaths as per the IHME smoothed death data estimates. Fig 1 (upper panel)  
424 shows the daily COVID-19 death curve in Mexico and Mexico City from March 20-November  
425 11, 2020. The mobility trend for Mexico (Fig 1, lower panel) shows that the human mobility  
426 tracked in the form of walking, driving and public transportation declined from end of March to  
427 the beginning of June, corresponding to the implementation of social distancing interventions

428 and the *Jornada Nacional de Sana Distancia* that was put in place between March 23-May 30,  
429 2020 encompassing the suspension of non-essential activities in public, private and social sectors  
430 [86]. The driving and walking trend subsequently increased in June with the reopening of the  
431 non-essential services. Fig 1 (upper panel) shows that reopening of the country coincides with  
432 the highest levels of daily deaths. These remain at a high level for just over two months (June  
433 and July). Then, from mid-August, the number of deaths begins to fall, reaching a reduction of  
434 nearly 50% by mid-October. But at the end of October a new growth begins.

435  
436 Fig 1: Upper panel: Epidemic curve for the COVID-19 deaths in Mexico and Mexico City from  
437 March 20-November 11, 2020. Blue line depicts the confirmed deaths in Mexico and green line  
438 depicts the confirmed deaths in Mexico City.

439 Lower panel: The mobility trends for Mexico from January 1-December 5, 2020. Orange line  
440 shows the driving trend, blue line shows the transit trend, and the black line shows the walking  
441 trend.

442  
443 In the subsequent sections, we first present the results for the short-term forecasting, followed by  
444 the estimation of the reproduction numbers. Then we present the results of the spatial analysis  
445 and the twitter data analysis.

446  
447 **Model calibration and forecasting performance**

448 Here we compare the calibration and 30-day ahead forecasting performance of our three models:  
449 the GLM, Richards growth model and the sub-epidemic wave model between March 20-  
450 September 27, 2020 and July 5-October 27, 2020 respectively for (i) Mexico and (ii) Mexico

451 City. We also compare the results of our cumulative mortality forecasts with the total mean  
452 smoothed death data estimates retrieved from the three IHME model scenarios (as explained in  
453 the methods section).

454

455 **Calibration performance.** Across the thirteen sequential model calibration phases for Mexico  
456 over a period of seven months (March-September), as provided in Table S1 and Fig 2, the sub-  
457 epidemic model outperforms the GLM with lower RMSE estimates for the seven calibration  
458 phases 3/20-07/04, 3/20-7/17, 3/20-8/17, 3/20-08/22, 3/20-09/13, 3/20-09/20, 3/20-09/27. The  
459 GLM model outperforms the other two models for the remaining six calibration phases in terms  
460 of RMSE. The Richards model has substantially higher RMSE (between 10.2-24.9) across all  
461 thirteen calibration phases indicating a sub-optimal model fit. The sub-epidemic model also  
462 outperforms the other two models in terms of MAE, MIS and the 95% PI coverage. It has the  
463 lowest values for MIS and the highest 95% PI coverage for nine of the thirteen calibration phases  
464 (Table S1). Moreover, the sub-epidemic model has the lowest MAE for eleven calibration  
465 phases. The Richards model shows much higher MIS and lower 95% PI coverage compared to  
466 the GLM and sub-epidemic model, pointing towards a sub-optimal model fit.

467

468 Fig 2: Calibration performance for each of the thirteen sequential calibration phases for GLM  
469 (magenta), Richards (red) and sub-epidemic (blue) model for Mexico. High 95% PI coverage  
470 and lower mean interval score (MIS), root mean square error (RMSE) and mean absolute error  
471 (MAE) indicate better performance.

472

473 For Mexico City, the sub-epidemic model outperforms the other two models in terms of all  
474 performance metrics. It has the lowest RMSE for eleven of the thirteen calibration phases  
475 followed by the GLM and Richards model. The MAE is also the lowest for the sub-epidemic  
476 model for all thirteen calibration phases, followed by the GLM and Richards growth model.  
477 Further, in terms of MIS, the sub-epidemic model outperforms the Richards and GLM model for  
478 nine calibration phases whereas the GLM model outperforms the other two models in four  
479 calibration phases (3/20-7/04, 3/20-7/11, 3/20-7/17, 3/20-8/02). The Richards model has much  
480 higher estimates for the MIS compared to the other two models indicating a sub-optimal model  
481 fit. The 95% PI across all thirteen calibration phases lies between 91.6-99.4% for the sub-  
482 epidemic model, followed by the Richards model (85.9- 100%) and the GLM model (53.2-  
483 100%) (Table S2, Fig 3).

484  
485 Fig 3: Calibration performance for each of the thirteen sequential calibration phases for GLM  
486 (magenta), Richards (red) and sub-epidemic (blue) model for Mexico City. High 95% PI  
487 coverage and lower mean interval score (MIS), root mean square error (RMSE) and mean  
488 absolute error (MAE) indicate better performance.

489  
490 Over-all the goodness of fit metrics points toward the sub-epidemic model as the most  
491 appropriate model for the Mexico City and Mexico across all four-performance metrics except  
492 for the RMSE for Mexico, where the estimates of GLM model compete with the sub-epidemic  
493 model.

494

495 **Forecasting performance.** For Mexico, the sub-epidemic model consistently outperforms the  
496 GLM and Richards growth model for ten out of the thirteen forecasting phases in terms of RMSE  
497 and MAE, eight forecasting phases in terms of MIS and nine forecasting phases in terms of the  
498 95% PI coverage. This is followed by the GLM and the Richards growth model (Fig 4, Table  
499 S4).

500  
501 Fig 4: Forecasting period performance metrics for each of the thirteen sequential forecasting  
502 phases for GLM (magenta), Richards (red) and sub-epidemic (blue) model for Mexico. High  
503 95% PI coverage and lower mean interval score (MIS), root mean square error (RMSE) and  
504 mean absolute error (MAE) indicate better performance.

505  
506 Similarly, for Mexico City, the sub-epidemic model consistently outperforms the GLM and  
507 Richards growth model for ten of the thirteen forecasting phases in terms of RMSE and MAE  
508 and eleven forecasting phases in terms of the MIS. Whereas, in terms of 95% PI coverage,  
509 forecasting phases 08/31- 09/29, 09/08-10/08 and 09/21-10/21 show zero 95% PI coverage  
510 across all three models. The sub-epidemic model outperforms the Richards and GLM model in  
511 six forecasting phases, with the Richards model performing better than the GLM model for the  
512 remaining four forecasting phases in terms of the 95% PI coverage (Fig 5, Table S3).

513  
514 Fig 5: Forecasting period performance metrics for each of the thirteen sequential forecasting  
515 phases for GLM (magenta), Richards (red) and sub-epidemic (blue) model for the Mexico City.  
516 High 95% PI coverage and lower mean interval score (MIS), root mean square error (RMSE) and  
517 mean absolute error (MAE) indicate better performance.



518

### 519 **Comparison of daily death forecasts**

520 The thirteen sequentially generated daily death forecasts from GLM and Richards growth model,  
521 for Mexico and Mexico City indicate towards a sustained decline in the number of deaths (S1  
522 Fig, S2 Fig, S3 Fig and S4 Fig). However, the IHME model forecasts (retrieved from smoothed  
523 death data estimates, current projections scenario) indicate a decline in the number of deaths for  
524 the first six forecasts periods followed by a stable epidemic trajectory for the last seven forecasts,  
525 for Mexico City and Mexico. Unlike the GLM and Richards models, the sub-epidemic model is  
526 able to reproduce the observed stabilization of daily deaths observed after the first six forecast  
527 periods for Mexico and the last three forecast periods for Mexico City (S5 Fig, S6 Fig, S7 Fig  
528 and S8 Fig)

529

### 530 **Comparison of cumulative mortality forecasts**

531 The total number of COVID-19 deaths is an important quantity to measure the progression of an  
532 epidemic. Here we present the results of the estimated cumulative death counts obtained from  
533 our 30-day ahead cumulative forecasts generated using the GLM, Richards and sub-epidemic  
534 growth model. We compare these results with the total mean smoothed death data estimates  
535 obtained from the three IHME modeling scenarios; current projection, universal masks and  
536 mandates easing. The total mean smoothed death data estimates obtained from the IHME current  
537 projections scenario as of November 11, 2020 are considered as a proxy for the actual death  
538 count for each date that the cumulative forecast is obtained (Figs 6 and 7) .

539

540 Fig 6: Systematic comparison of the six models (GLM, Richards, sub-epidemic model, IHME  
541 current projections (IHME C.P), IHME universal masks (IHME U.M) and IHME mandates  
542 easing (IHME M.E) to predict the cumulative COVID-19 deaths for Mexico in the thirteen  
543 sequential forecasts. The blue circles represent the mean deaths, and the magenta vertical line  
544 indicates the 95% PI around the mean death count. The horizontal dashed line represents the  
545 actual death count reported by that date in the November 11, 2020 IHME estimates files.

546  
547 Fig 7: Systematic comparison of the six (GLM, Richards, sub-epidemic model, IHME current  
548 projections (IHME C.P), IHME universal masks (IHME U.M) and IHME mandates easing  
549 (IHME M.E) to predict the cumulative COVID-19 deaths for the Mexico City in the thirteen  
550 sequential forecasts. The blue circles represent the mean deaths, and the magenta vertical line  
551 indicates the 95% PI around the mean death count. The horizontal dashed line represents the  
552 actual death count reported by that date in the November 11, 2020 IHME estimates files.

553  
554 **Mexico.** The 30-day ahead cumulative forecast results for the thirteen sequentially generated  
555 forecasts for Mexico utilizing GLM, Richards growth model, sub-epidemic growth model and  
556 the IHME model (current projections scenario) are presented in S9 Fig, S10 Fig, S11 Fig and  
557 S12 Fig. The cumulative mortality estimates comparison is given in Fig 6. For the first, second,  
558 third and thirteenth generated forecasts the GLM, sub-epidemic model and the Richards model  
559 tend to underestimate the true deaths counts (~50,255, ~54,857, ~58,604, 89,730 deaths  
560 respectively), whereas the three IHME forecasting scenarios closely estimate the actual death  
561 counts for the first, second and thirteenth forecasting periods. For the fourth, fifth and seventh  
562 generated forecast the sub-epidemic model and the IHME scenarios most closely approximate

563 the actual death counts (~63,078, ~67,075, ~76,054 deaths respectively). For the sixth generated  
 564 forecast the GLM model closely approximates the actual death count (~73,911 deaths) whereas  
 565 for the tenth generated forecast the sub-epidemic model closely approximates the actual deaths  
 566 (~84,471 deaths). For the eighth, ninth, eleventh and twelfth generated forecast GLM, Richards  
 567 and sub-epidemic model tend to under-predict the actual death counts with the IHME model  
 568 underestimating the actual death counts for eleventh and twelfth generated forecast and  
 569 overestimating the total death counts for the ninth generated forecast (Table 2).

570

571 Table 2: Cumulative mortality estimates obtained from the six models (GLM, Richards model,  
 572 sub-epidemic model, IHME current projections, IHME universal mask and IHME mandates  
 573 easing) for each forecasting period of the COVID-19 pandemic in Mexico (2020).

574

| Forecast Number | Forecast period | GLM Mean (95% PI)      | Sub-epidemic model Mean (95% PI) | Richards model Mean (95% PI) | IHME current projections Mean (95% PI) | IHME universal mask Mean (95% PI) | IHME mandates easing Mean (95% PI) | Actual deaths reported as of Nov 11, 2020 |
|-----------------|-----------------|------------------------|----------------------------------|------------------------------|----------------------------------------|-----------------------------------|------------------------------------|-------------------------------------------|
| 1               | 07/05-08/03     | 48,917 (43,931-54,039) | 48,110 (42,939-53,661)           | 45,808 (38,808-53,665)       | 50,721 (47,410-55,597)                 | 49,692 (46,500-54,250)            | 51,299 (47,893-56,184)             | 50,255                                    |
| 2               | 07/12-08/10     | 49,412 (44,517-49,412) | 52,085 (46,973-57,379)           | 47,358 (39,836-55,808)       | 54,438 (49,269-59,598)                 | 53,615 (48,634-58,590)            | 55,176 (49,609-60,621)             | 54,857                                    |
| 3               | 07/18-08/16     | 52,197 (47,059-57,541) | 54,758 (49,600-60,070)           | 50,055 (42,161-58,892)       | 54,572 (39,989-62,409)                 | 54,020 (39,989-61,614)            | 54,749 (39,989-62,710)             | 58,604                                    |
| 4               | 07/26-08/24     | 56,658 (51,208-62,320) | 62,271 (56,644-68,073)           | 53,742 (45,332-63,144)       | 62,902 (58,094-68,253)                 | 62,194 (57,516-67,205)            | 63,116 (58,285-68,542)             | 63,078                                    |
| 5               | 08/03-09/01     | 61,451 (55,655-67,494) | 67,010 (60,988-73,219)           | 57,186 (48,270-67,114)       | 66,376 (63,705-69,334)                 | 65,944 (63,308-68,853)            | 66,582 (63,865-69,612)             | 67,075                                    |
| 6               | 08/18-09/16     | 73,700 (66,996-        | 79,144 (72,306-                  | 65,814 (55,834-              | 80,072 (74,140-                        | 79,598 (73,772-                   | 80,537 (74,479-                    | 73,911                                    |

|    |             |                           |                           |                           |                           |                           |                           |        |
|----|-------------|---------------------------|---------------------------|---------------------------|---------------------------|---------------------------|---------------------------|--------|
|    |             | 80,655)                   | 86,048)                   | 76,954)                   | 84,710)                   | 84,225)                   | 85,288)                   |        |
| 7  | 08/23-09/21 | 73,901<br>(67,126-80,909) | 75,809<br>(69,107-82,699) | 67,273<br>(57,061-78,667) | 75,125<br>(73,161-78,209) | 74,887<br>(72,993-77,883) | 75,160<br>(73,207-78,254) | 76,054 |
| 8  | 08/31-09/30 | 76,535<br>(69,509-83,826) | 77,629<br>(70,688-84,743) | 70,218<br>(59,490-82,174) | 78,525<br>(76,644-80,538) | 78,653<br>(76,767-80,669) | 79,016<br>(77,057-81,135) | 79,683 |
| 9  | 09/08-10/08 | 79,406<br>(72,084-87,022) | 79,491<br>(72,250-86,959) | 72,712<br>(61,556-85,135) | 84,215<br>(80,639-88,038) | 84,307<br>(80,682-88,069) | 84,937<br>(81,130-88,999) | 82,669 |
| 10 | 09/14-10/13 | 81,546<br>(74,030-89,356) | 84,561<br>(76,905-92,411) | 74,504<br>(63,026-87,292) | 86,249<br>(84,255-88,722) | 85,926<br>(83,982-88,256) | 86,249<br>(84,259-88,694) | 84,471 |
| 11 | 09/21-10/21 | 82,815<br>(75,098,90,804) | 84,392<br>(76,640-92,327) | 76,386<br>(64,579-89,556) | 84,731<br>(83,126-86,880) | 84,435<br>(82,872-86,512) | 84,731<br>(83,135-86,864) | 87,396 |
| 12 | 09/28-10/27 | 84,827<br>(76,896-93,047) | 85,885<br>(77,943-94,022) | 78,448<br>(66,244-92,090) | 87,491<br>(84,095-90,872) | 87,265<br>(83,967-90,580) | 87,522<br>(84,115-90,945) | 89,730 |
| 13 | 09/28-10/27 | 85,197<br>(77,258-93,454) | 86,850<br>(78,896-95,001) | 77,876<br>(65,750-91,401) | 89,666<br>(88,264-91,036) | 89,627<br>(88,280-91,036) | 89,667<br>(88,281-91,036) | 89,730 |

575

576 In summary, the Richards growth model consistently under-estimates the actual death count  
577 compared to the GLM, sub-epidemic model and three IHME model scenarios. The GLM model  
578 also provides lower estimates of the mean death counts compared to the sub-epidemic and three  
579 IHME model scenarios, but higher mean death estimates compared to the Richards model. The  
580 95% PI for the Richards model is substantially wider than the other five models indicating wider  
581 uncertainty in the results. The actual mean death counts lie within the 95% PI of the sub-  
582 epidemic model for all the thirteen forecasts. Moreover, the three IHME model scenarios predict  
583 approximately similar cumulative death counts across the thirteen generated forecasts, indicating  
584 that the three scenarios do not differ substantially.

585

586 **Mexico City.** The 30 day ahead cumulative forecast results for thirteen sequentially generated  
 587 forecasts for the Mexico City utilizing GLM, Richards model, sub-epidemic growth model and  
 588 IHME model (current projections scenario) are presented in S13 Fig, S14 Fig, S15 Fig and S16  
 589 Fig. The cumulative death comparison is given in Fig 7 and Table 3. For the first generated  
 590 forecast the sub-epidemic model closely approximates the actual death count (~10,081 deaths).  
 591 For the second generated forecast, the sub-epidemic model and the IHME scenarios closely  
 592 approximate the actual death count (~10,496 deaths). For the third and sixth generated forecast  
 593 GLM and Richards model underestimate the actual death count (~10,859, ~12,615 deaths  
 594 respectively) whereas the sub-epidemic model closely estimates the death count for the third  
 595 forecast and under-predicts the death count for the sixth forecast. The three IHME model  
 596 scenarios seem to predict the actual death counts closely. For the fourth, fifth, seventh, eighth,  
 597 ninth, tenth, eleventh, twelfth and thirteenth generated forecasts all models under-predict the  
 598 actual death counts.

599  
 600 Table 3: Cumulative mortality estimates obtained from the six models (GLM, Richards model,  
 601 sub-epidemic model, IHME current projections, IHME universal mask and IHME mandates  
 602 easing) for each forecasting period of the COVID-19 pandemic in Mexico City (2020).

603

| Forecast Number | Forecast period | GLM<br>Mean<br>(95% PI) | Sub-epidemic model<br>Mean<br>(95% PI) | Richards model<br>Mean<br>(95% PI) | IHME current projections<br>Mean<br>(95% PI) | IHME universal mask<br>Mean<br>(95% PI) | IHME mandates easing<br>Mean<br>(95% PI) | Actual deaths reported as of Nov 11, 2020 |
|-----------------|-----------------|-------------------------|----------------------------------------|------------------------------------|----------------------------------------------|-----------------------------------------|------------------------------------------|-------------------------------------------|
| 1               | 07/05-08/03     | 8,480<br>(6,642-10,549) | 9,655<br>(7,437-12,016)                | 8,628<br>(5,712-12,363)            | 9,075<br>(8,334-9,888)                       | 8,991<br>(8,334-9,888)                  | 9,195<br>(8,443-10,182)                  | 10,081                                    |
| 2               | 07/12-          | 8,968                   | 10,534                                 | 9,015                              | 10,091                                       | 10,018                                  | 10,254                                   | 10,496                                    |

|    |             |                          |                           |                          |                           |                            |                           |        |
|----|-------------|--------------------------|---------------------------|--------------------------|---------------------------|----------------------------|---------------------------|--------|
|    | 08/10       | (7,022-11,119)           | (8,063-13,187)            | (5,951-12,971)           | (8,607-12,421)            | (8,598-12,263)             | (8,648-12,905)            |        |
| 3  | 07/18-08/16 | 9,447<br>(7,402-11,710)  | 11,287<br>(8,541-14,037)  | 9,495<br>(6,291-13,616)  | 10,388<br>(8,382-12,505)  | 10,323<br>(8,381-12,365)   | 10,467<br>(8,381-12,660)  | 10,859 |
| 4  | 07/26-08/24 | 9,588<br>(7,478-11,891)  | 10,249<br>(8,042-12,622)  | 9,575<br>(6,283-13,836)  | 10,481<br>(9,761-11,551)  | 10,424<br>(9,729-11,433)   | 10,526<br>(9,791-11,623)  | 11,326 |
| 5  | 08/03-09/01 | 9,786<br>(7,621-12,166)  | 10,232<br>(7,950-12,686)  | 9,737<br>(6,351-14,140)  | 10,314<br>(9,746-11,477)  | 10,290<br>(9,733-11,423)   | 10,314<br>(9,746-11,477)  | 11,769 |
| 6  | 08/18-09/16 | 10,388<br>(8,054-12,957) | 11,103<br>(8,646-13,752)  | 10,425<br>(6,762-15,212) | 12,099<br>(11,387-13,118) | 12,055<br>(11,362-13,046)  | 12,184<br>(11,422-13,255) | 12,615 |
| 7  | 08/23-09/21 | 10,615<br>(8,226-13,272) | 11,205<br>(8,700-13,911)  | 10,411<br>(6,719-15,250) | 11,826<br>(11,289-12,584) | 11,794<br>(11,273-12,527)  | 11,826<br>(11,290-12,585) | 12,966 |
| 8  | 08/31-09/30 | 10,851<br>(8,381-13,581) | 11,103<br>(8,646-13,752)  | 10,872<br>(6,997-15,950) | 11,829<br>(11,397-12,328) | 11,842<br>(11,409-12,527)  | 11,871<br>(11,421-12,394) | 13,414 |
| 9  | 09/08-10/08 | 11,182<br>(8,621-14,011) | 11,237<br>(8,721-13,955)  | 10,820<br>(6,936-15,966) | 12,547<br>(11,851-13,318) | 12,560<br>(11,859-13,340)  | 12,604<br>(11,881-13,413) | 13,838 |
| 10 | 09/14-10/13 | 11,553<br>(8,887-14,492) | 12,443<br>(9,645-15,439)  | 11,064<br>(7,043-16,373) | 13,256<br>(12,586-14,106) | 13,215<br>(12,566-14,031)  | 13,256<br>(12,857-14,105) | 14,107 |
| 11 | 09/21-10/21 | 11,711<br>(8,985-14,714) | 12,636<br>(9,737-15,742)  | 11,811<br>(7,578-17,367) | 12,727<br>(12,326-13,200) | 12,699<br>(12,310, 13,156) | 12,728<br>(12,327-13,192) | 14,561 |
| 12 | 09/28-10/27 | 12,074<br>(9,253-15,195) | 12,878<br>(9,919-16,054)  | 11,503<br>(7,315-17,079) | 13,358<br>(12,718-14,095) | 13,332<br>(12,705-14,049)  | 13,361<br>(12,720-14,153) | 14,911 |
| 13 | 09/28-10/27 | 12,493<br>(9,570-15,716) | 13,460<br>(10,341-16,815) | 11,659<br>(7,398-17,370) | 14,172<br>(13,539-15,031) | 14,131<br>(13,522-14,958)  | 14,191<br>(14,541-15,128) | 15,306 |

604

605

606 In general, the Richards growth model has much wider 95% PI coverage compared to the other  
 607 models indicating greater uncertainty in the results. The mean cumulative death count estimates  
 608 for the GLM and Richards model closely approximate each other. However, the actual mean  
 609 death counts lie within the 95% PI of the GLM and sub-epidemic model for all the thirteen

610 forecasts. The three IHME model scenarios predict approximately similar cumulative death  
611 counts across the thirteen generated forecasts with much narrow 95% PI's, indicating that three  
612 scenarios do not differ substantially.

613

## 614 **Reproduction number**

615

616 **Estimate of reproduction number,  $R$  from genomic data analysis.** The majority of analyzed  
617 Mexican SARS-CoV-2 sequences (69 out of 83) have been sampled in March and April 2020.  
618 These sequences are spread along the whole global SARS-CoV-2 phylogeny (Fig 8) and split  
619 into multiple clusters. This indicates multiple introductions of SARS-CoV-2 to the country  
620 during the initial pandemic stage (February 27- May 29, 2020). For the largest cluster of size 42,  
621 the reproduction number was estimated at  $R = 1.3$  (95% HPD interval [1.1,1.5]).

622

623 Fig 8: Global neighbor-joining tree for SARS-CoV-2 genomic data from February 27- May 29,  
624 2020. Sequences sampled in Mexico are highlighted in red.

625

626 **Estimate of reproduction number,  $R_t$  from case incidence data.** The reproduction number  
627 from the case incidence data (February 27- May 29, 2020) using GGM was estimated at  
628  $R_t \sim 1.1$  (95% CI: 1.1, 1.1), in accordance with the estimate of  $R_t$  obtained from the genomic data  
629 analysis. The growth rate parameter,  $r$ , was estimated at 1.2 (95% CI: 1.1, 1.4) and the  
630 deceleration of growth parameter,  $p$ , was estimated at 0.7 (95% CI: 0.68, 0.71), indicating early  
631 sub-exponential growth dynamics of the epidemic (Fig 9).

632

633 Fig 9: Upper panel: Reproduction number with 95% CI estimated using the GGM model. The  
634 estimated reproduction number of the COVID-19 epidemic in Mexico as of May 29, 2020 is 1.1  
635 (95% CI: 1.1, 1.1). The growth rate parameter,  $r$ , is estimated at 1.2 (95% CI:1.1, 1.4) and the  
636 deceleration of growth parameter,  $p$ , is estimated at 0.7 (95% CI:0.68, 0.71).

637 Lower panel: The lower panel shows the GGM fit to the case incidence data for the first 90 days.  
638

639 **Estimate of instantaneous reproduction number,  $R_t$ .** The instantaneous reproduction number  
640 for Mexico remained consistently above 1.0 until the end of May 2020, after which the  
641 reproduction number has fluctuated around 1.0 with the estimate of  $R_t \sim 0.93$  (95% CrI: 0.91,  
642 0.94) as of September 27, 2020. For Mexico City, the reproduction number remained above 1.0  
643 until the end of June after which it has fluctuated around 1.0 with the estimate of  $R_t \sim 0.96$  (95%  
644 CrI: 0.93, 0.99) as of September 27, 2020 (Fig 10).

645

646 Figure 10: Upper panel: Epidemiological curve (by the dates of symptom onset) for Mexico (left  
647 panel) and Mexico City (right panel) as of September 27, 2020.

648 Lower panel: Instantaneous reproduction number with 95% credible intervals for the COVID-19  
649 epidemic in Mexico as of September 27, 2020. The red solid line represents the mean  
650 reproduction number for Mexico and the red shaded area represents the 95% credible interval  
651 around it. The blue solid line represents the mean reproduction number for the Mexico City and  
652 the blue shaded region represents the 95% credible interval around it.

653

654 **Spatial analysis**



655 Fig S17 shows the result from pre-processing COVID-19 data into growth rate functions. The  
656 results of clustering are shown in Fig S18 as a dendrogram plot and the states color coded based  
657 on their cluster membership within the map of Mexico (Fig 11; left panel). The four predominant  
658 clusters we identified include the following states:

659 Cluster 1: Baja California, Coahuila, Colima, Mexico City, Guanajuato, Guerrero, Hidalgo,  
660 Jalisco, Mexico, Michoacán, Morelos, Nuevo Leon, Oaxaca, Puebla, San Luis Potosi, Sinaloa,  
661 and Tlaxcala

662 Cluster 2: Baja California Sur, Campeche, Chiapas, Nayarit, Quintana Roo, Sonora, Tabasco,  
663 Tamaulipas, Veracruz, and Yucatan

664 Cluster 3: Chihuahua

665 Cluster 4: Aguascalientes, Durango, Queretaro, and Zacatecas

666 Figure 11: Clusters of states by their growth rates. Cluster 1 in blue, cluster 2 in orange, cluster 3  
667 in yellow, and cluster 4 in purple. The right panel shows the average growth rate curves for each  
668 cluster (solid curves) and their overall average (black broken curve).

669

670 Fig 11(right panel) shows the average shape of growth rate curves in each cluster and the overall  
671 average. Fig S19 shows mean growth rate curves and one standard-deviation bands around it, in  
672 each cluster. Since cluster 3 included only one state, average growth rate of cluster 1, cluster 2,  
673 and cluster 4 are shown. The average growth patterns in the three categories are very distinct and  
674 clearly visible. For cluster 1, the rate rises rapidly from April to July and then shows small  
675 fluctuations. For cluster 2, there is rapid increase in growth rate from April to July followed by a  
676 rapid decline. Chihuahua in cluster 3 shows a slow growth rate until September followed by a

677 rapid rise until mid-September which then declines rapidly. For cluster 4, the rate rises slowly,  
678 from April to September, and then shows a rapid rise (Fig S20).

679

680 From the colormap (Fig 12) we can see that the cases were concentrated from the beginning in  
681 the central region in Mexico and Mexico City. Daily cases have been square root transformed to  
682 reduce variability in the amplitude of the time series while dashed lines separate the Northern,  
683 Central, and Southern regions. Fig S20 shows the timeseries graph of daily COVID-19 new cases  
684 by the date for all states, Northern states, Central states, and the Southern states. As observed for  
685 both Northern and Central regions including the national level, the epidemic peaked in mid-July  
686 followed by a decline at around mid-September, which then started rising again. Southern states  
687 exhibit a stable decline. Fig S21 shows the total number of COVID-19 cases at state level as of  
688 December 5, 2020. Some of the areas with a higher concentration of COVID-19 cases are:  
689 Mexico City, Mexico state, Guanajuato in the central region and, Nuevo Leon in the Northern  
690 region.

691

692 Fig 12: Color scale image of daily COVID-19 cases by region.

693

#### 694 **Twitter data analysis**

695 The epicurve for Mexico is overlaid with the curve of tweets indicating stay at home orders in  
696 Mexico as shown in S22 Fig. The engagement of people in Mexico with the #quedateencasa  
697 hashtag (stay-at-home order hashtag) has been gradually declining as the number of cases have  
698 continued to increase or remain at a steady pace, showing the frustration and apathy of public on  
699 lock downs and restrictions. Mostly the non-government public health experts are calling for

700 more lockdowns or continued social distancing measures (without being heard by the  
701 authorities). It could also imply that the population is not following the government's stay at  
702 home orders and hence we continue to observe the cases. S22 Fig shows that the highest number  
703 of tweets were made in the earlier part of the epidemic, with the number of tweets declining as of  
704 mid-May 2020. In contrast, the number of cases by onset dates peaked around mid-June. The  
705 correlation coefficient between the epi-curve of cases by dates of onset and the curve of tweets  
706 representing the stay-at-home orders was estimated at  $R=-0.001$  from March 12- November 11,  
707 2020.

708

## 709 **Discussion**

710 The results of our GLM model fit to the smoothed death data estimates for all the thirteen  
711 calibration phases and GGM fit to the case incidence data indicate sub-exponential growth  
712 dynamics of COVID-19 epidemic in the Mexico and Mexico City with the parameter  $p$  estimated  
713 between ( $p\sim 0.6-0.8$ ). Moreover, the early estimates of  $R$  indicate towards sustained disease  
714 transmission in the country. As  $R_t$  fluctuates around  $\sim 1.0$  since the end of July 2020, we observe  
715 different epidemic growth patterns at the national and state level. With ongoing virus  
716 transmission in Mexico, the Twitter analysis implies the relaxation of lockdowns, with  
717 inconsequential decline in the mobility patterns observed over the last few weeks as evident from  
718 the Apple's mobility trends. Moreover, the systematic comparison of our models across thirteen  
719 sequential forecasts deems sub-epidemic model as the most appropriate model for mortality  
720 forecasting. The sub-epidemic model is also able to reproduce the stabilization in the trajectory  
721 of mortality forecasts as observed by the IHME forecasts.

722

723 The sub-exponential growth pattern of the COVID-19 epidemic in Mexico can be attributed to a  
724 myriad of factors including non-homogenous mixing, spatial structure, population mobility,  
725 behavior changes and interventions [87]. Our results are consistent with the sub-exponential  
726 growth patterns of COVID-19 outbreaks observed in Mexico [88] and Chile [89]. Along with the  
727 observed sub-exponential growth dynamics of the COVID-19 epidemic in Mexico, the  
728 reproduction number estimated from the genomic sequence analysis and the case incidence data  
729 ( $R_t \sim 1.1-1.2$ ) indicate towards sustained transmission of SARS-CoV-2 in Mexico during the  
730 early transmission phase of the virus (February 27- May 29, 2020). Our estimates of  $R_t$  are  
731 similar to the estimates of reproduction number retrieved from other studies conducted in  
732 Mexico [90], Chile [91, 92], Peru [93] and Brazil [94]. The early estimate of  $R_t$  obtained from  
733 the Cori et al. method in our study also coincides with the early estimates of  $R_t$  obtained from  
734 the case incidence data and the genomic data ( $R_t \sim 1$ ). The instantaneous reproduction number  
735 estimated from our study shows that  $R_t$  is slightly above 1 since the end of March, without a  
736 significant increase. This is in accordance with the estimates of  $R_t$  obtained from a study  
737 conducted in Mexico [95].

738

739 In general, Mexico has seen a sustained SARS-CoV-2 transmission and an increase or a  
740 sustained number of cases despite the implementation of the social distancing interventions  
741 including the stay-at-home orders that were eased around June 2020. As our twitter data analysis  
742 also shows, the number of cases by onset dates was negatively correlated to the stay-at-home  
743 orders. A possible explanation indicates that people might have stopped following the  
744 government's preventive orders to stay at home as a result of pandemic fatigue [96, 97]. Mexico  
745 has been one of the countries where the stay-at-home orders have been least respected. The

746 average reduction in mobility in Mexico is reported to be ~35.4% compared to 71% mobility  
747 reduction in Brazil, and 86% mobility reduction in Argentina and Colombia [98]. These  
748 preventive orders have affected the Mexican population disproportionately, with some  
749 proportion of the population exhibiting aggression towards quarantine and stay-at-home orders  
750 [36]. However, the public health professionals are frustrated towards the relaxation of stay-at-  
751 home orders and reopening of the country, as the cases and deaths keep mounting. We can also  
752 appreciate the variable spatial-temporal dynamics of the COVID-19 epidemic in Mexico. Our  
753 classification of epidemic pattern at the state level in Mexico shows distinct variation of growth  
754 rates across states. For instance, cluster 1 including Baja California, Colima and Mexico City has  
755 stable growth at a higher rate and cluster 4 including Aguascalientes, Durango, Queretaro, and  
756 Zacatecas shows a rising pattern in the growth rate (Figure 11). This information can be utilized  
757 by the states in guiding their decision regarding the implementation of public health measures.  
758 For example, states in cluster 1 and 4 may need strict public health measures to contain the  
759 epidemic.

760  
761 Appropriate short-term forecasts can also help gauge the impact of interventions in near real-  
762 time. In this study we compared the performance of our three models for short-term real-time  
763 forecasting the COVID-19 mortality estimates in Mexico and Mexico City. As in Figs 2-5 the  
764 sub-epidemic model can be declared the most appropriate model as it exhibits the most desirable  
765 performance metrics across majority of the calibration and forecasting phases. This model has  
766 the capacity to accommodate more complex epidemic trajectories suggesting a longer epidemic  
767 wave and can better adjust to the early signs of changes in disease transmission, while other  
768 models (GLM and Richards) are less reactive. This model can also be utilized as a potential

769 forecasting tool for other cities in Mexico; comparing its results with other prediction models.  
770 Moreover, further short-term forecasts (5,10 days) could be also be conducted with the sub-  
771 epidemic model using the consecutive calibration phases to reduce the error metrics [52].

772  
773 Overall, the sequential forecasts based on the daily smoothed death estimates for Mexico from  
774 the two models (GLM, Richards) suggest a decline in over-all deaths (S1 Fig and S2 Fig)  
775 consistent with the sustained decline in COVID-19 associated case fatalities since mid-August as  
776 reported by the Mexican government, officially [99]. However, this decline in COVID-19 deaths  
777 can be attributed to the inaccurate reporting of deaths in the surveillance system or downplay of  
778 fatalities by the government. For instance, the reported excess deaths as of September 26, 2020  
779 are estimated to be 193170, with 139151 deaths attributable to COVID-19 [100]. While the  
780 official tally of COVID-19 deaths in Mexico is only exceeded by USA and Brazil, its roughly  
781 approximated with that of India, a country whose population is ten times larger than Mexico  
782 [101]. As observed earlier, the easing of the social distancing interventions and lifting of  
783 lockdowns in Mexico in the month of June led to a surge of the COVID-19 associated deaths  
784 [102]. In June, the government of Mexico also inaccurately forecasted that a potential decline in  
785 the number of COVID-19 deaths will be observed by September, 2020 [103]. Therefore, the  
786 forecasting trends need to be interpreted cautiously in order to inform policies. The IHME model  
787 also shows a decline in COVID-19 deaths in Mexico from mid-August-September, which have  
788 stabilized since then for the last six forecast periods (S5 Fig). The sub-epidemic model also  
789 indicates a stabilization of the deaths for the last seven forecast periods (S6 Fig) consistent with  
790 the results obtained from the IHME model.

791

792 Similarly, for Mexico City, the sequential forecasts obtained from the GLM and Richards model  
793 fit to the daily death data estimates indicate a decline in the overall deaths (S3 Fig, S4 Fig). The  
794 IHME and sub-epidemic models on the other hand indicate a stabilized trajectory of deaths for  
795 the last three forecast periods (S7 Fig and S8 Fig) (suggesting that the actual death counts might  
796 not be decreasing in Mexico City) as seen with Mexico. Based on the death data, the observed  
797 decline or stability in death predictions could likely reflect the false slowing down of the  
798 epidemic in Mexico City [102]. Moreover, insufficient testing can also result in an inaccurate  
799 trajectory of the COVID-19 mortality curve [104].

800  
801 The cumulative comparison of deaths in Mexico and Mexico City indicates that in general, the  
802 Richards model has under-performed in predicting the actual death counts with much wider  
803 uncertainty around the mean death estimates. The Richards model has also failed to capture the  
804 early sub-exponential dynamics of the mortality curve. The cumulative death counts obtained  
805 from the flexible sub-epidemic model closely approximate the total mean death counts obtained  
806 from the three IHME modeling scenarios. Whereas the GLM slightly under predicts the  
807 cumulative death counts (Fig 6, Fig 7). On the other hand, another competing model, the  
808 COVID-19 predictions model projects 87,151 deaths (95% PI:84,414, 91,883) for Mexico as of  
809 October 27, 2020 (last forecasting phase), an estimate that closely approximates the estimates  
810 obtained from the GLM model (between 77,258-93,454 deaths) [105].

811  
812 The three models (GLM, Richards, sub-epidemic model) used in this study generally provide  
813 good fits to the mortality curve based on the residuals. The Richards model however is unable to  
814 capture the early sub-exponential dynamics of the mortality curve. Moreover, these

815 phenomenological models are particularly valuable for providing rapid predictions of the  
816 epidemics in complex scenarios that can be used for real-time preparedness since these models  
817 do not require specific disease transmission processes to account for the interventions. Since  
818 these models do not explicitly account for behavioral changes, the results should be interpreted  
819 with caution. Importantly, since the mortality curves employed in this study are reported  
820 according to the date of reporting, they are likely influenced by variation in the testing rates and  
821 related factors including the case fatality rates. Further, delays in reporting of deaths due to the  
822 magnitude of the epidemic could also influence our predictions. Moreover, using the reporting  
823 date is not ideal due to the time difference between the date of death and the reporting date of  
824 death, which at a given moment can give a false impression of the ongoing circumstances.

825

826 This paper is not exempt from limitations. First, the IHME (current projections, mandated mask,  
827 and worst-case scenario) model utilized has been revised multiple times over the course of the  
828 pandemic and differs substantially in methodology, assumptions, range of predictions and  
829 quantities estimated. Second, the IHME has been irregular in publishing the downloadable  
830 estimates online for some periods. Third, we model the death estimates by date of reporting  
831 rather than by the date of death. Lastly, the unpredictable social component of the epidemic on  
832 ground is also a limiting factor for the study as we do not know the ground truth mortality pattern  
833 when the forecasts are generated.

834

835 In conclusion, the reproduction number has been fluctuating around  $\sim 1.0$  since the end of July-  
836 end of September 2020, indicating sustained virus transmission in the region. Moreover, the  
837 country has seen much lower mobility reduction and mixed reactions towards the stay-at-home



838 orders contributing towards the virus transmission in the country. Moreover, the spatial analysis  
839 indicates that states like Mexico, Michoacán, Morelos, Nuevo Leon, Baja California need to put  
840 in place stronger public health strategies to contain the rising patterns in growth rates. The GLM  
841 and sub-epidemic model applied to mortality data in Mexico provide reasonable estimates for  
842 short-term projections in near real-time. While the GLM and Richards models predict that the  
843 COVID-19 outbreak in Mexico and Mexico City may be on a sustained decline, the sub-  
844 epidemic model and IHME model predict a stabilization of daily deaths. However, our forecasts  
845 need to be interpreted with caution given the dynamic implementation and lifting of the social  
846 distancing measures.

847

848 **Author Contributions:** Conceptualization, G.C. and A.T.; methodology, G.C, A.T.; validation,  
849 G.C.; formal analysis, A.T., G.C.; investigation, A.T. S.D., J.M.B., P.S. ; resources, G.C., A.T.  
850 J.M.B., B.E. A.B, P.S; data curation, A.T.; writing—original draft preparation, A.T., G.C.;  
851 writing, review and editing, A.T., G.C., J.M.B., P.S., S.D., C.C.G, B.E., N.G.B., R.A.S, A.K,  
852 R.L, A.S, H.G., N.G.C., A.I.B., M.E.J; visualization, A.T., G.C.; supervision, G.C.; project  
853 administration, G.C.; funding acquisition, G.C. All authors have read and agreed to the published  
854 version of the manuscript.

855

856 **Funding:** G.C. is partially supported from NSF grants 1610429 and 1633381 and R01 GM  
857 130900. A.T. is supported by a 2CI fellowship from Georgia State University.

858

859 **Conflicts of Interest:** The authors declare no conflict of interest.

860

861 **References**

- 862 1. Johnson NP, Mueller J. Updating the accounts: global mortality of the 1918-1920  
863 "Spanish" influenza pandemic. *Bull Hist Med.* 2002;76(1):105-15.
- 864 2. Cascella M, Rajnik M, Cuomo A, Dulebohn SC, Di Napoli R. Features, Evaluation, and  
865 Treatment of Coronavirus (COVID-19). *StatPearls. Treasure Island (FL): StatPearls Publishing*  
866 Copyright © 2020, StatPearls Publishing LLC.; 2020.
- 867 3. Li Z, Chen Q, Feng L, Rodewald L, Xia Y, Yu H, et al. Active case finding with case  
868 management: the key to tackling the COVID-19 pandemic. *The Lancet.* 2020;396(10243):63-70.
- 869 4. COVID-19 coronavirus / cases [Internet]. 2020. Available from:  
870 <https://www.worldometers.info/coronavirus/coronavirus-cases/>.
- 871 5. WHO. Situation Reports Coronavirus World Health Organization2020 [Available from:  
872 <https://www.who.int/emergencies/diseases/novel-coronavirus-2019/situation-reports>.
- 873 6. WHO. Summary of probable SARS cases with onset of illness from 1 November 2002 to  
874 31 July 2003 2003 [Available from:  
875 [https://www.who.int/csr/sars/country/table2004\\_04\\_21/en/](https://www.who.int/csr/sars/country/table2004_04_21/en/).
- 876 7. WHO. MERS situation update November 2019. World Health Organization; 2019.
- 877 8. The L. COVID-19 vaccines: no time for complacency. *The Lancet.* 2020;396(10263):1607.
- 878 9. Ledford H. US authorization of first COVID vaccine marks new phase in safety  
879 monitoring. *Nature.* 2020.
- 880 10. Reiner RC, Barber RM, Collins JK, Zheng P, Adolph C, Albright J, et al. Modeling COVID-19  
881 scenarios for the United States. *Nature Medicine.* 2021;27(1):94-105.
- 882 11. Azanza Ricardo CL, Hernandez Vargas EA. The Risk of Lifting COVID-19 Confinement in  
883 Mexico. *medRxiv.* 2020:2020.05.28.20115063.
- 884 12. Shuchman M. Low- and middle-income countries face up to COVID-19. *Nature Medicine.*  
885 2020(26):986-8.
- 886 13. Barnett-Howell Z, Mobarak AM. Should Low-Income Countries Impose the Same Social  
887 Distancing Guidelines as Europe and North America to Halt the Spread of COVID-19? 2020  
888 [cited 2020 April 2]. Available from: [https://som.yale.edu/should-low-income-countries-](https://som.yale.edu/should-low-income-countries-impose-the-same-social-distancing-guidelines-as-europe-and-north-america-to-halt-the-spread-of-covid-19)  
889 [impose-the-same-social-distancing-guidelines-as-europe-and-north-america-to-halt-the-](https://som.yale.edu/should-low-income-countries-impose-the-same-social-distancing-guidelines-as-europe-and-north-america-to-halt-the-spread-of-covid-19)  
890 [spread-of-covid-19](https://som.yale.edu/should-low-income-countries-impose-the-same-social-distancing-guidelines-as-europe-and-north-america-to-halt-the-spread-of-covid-19).
- 891 14. Regmi K, Lwin CM. Impact of social distancing measures for preventing coronavirus  
892 disease 2019 [COVID-19]: A systematic review and meta-analysis protocol. *medRxiv.*  
893 2020:2020.06.13.20130294.
- 894 15. MOH. Ministry of Health Mexico 2020 [Available from:  
895 <https://www.gob.mx/salud/documentos/datos-abiertos-152127>.
- 896 16. Statista. Number of people living in poverty in Mexico between 2008 and 2018 (in  
897 millions) 2019 [cited 2019 July]. Available from:  
898 <https://www.statista.com/statistics/1039479/mexico-people-living-poverty/>.
- 899 17. Coneval. Poverty measurement, poverty measurement in Mexico 2020 [Available from:  
900 <https://www.coneval.org.mx/Medicion/Paginas/PobrezalInicio.aspx>.
- 901 18. Organization IL. Informal employment in Mexico: Current situation, policies and  
902 challenges. 2014.
- 903 19. Agren D. Understanding Mexican health worker COVID-19 deaths. *The Lancet.*  
904 2020;396(10254):807.

- 905 20. Montes J. Covid-19 Takes Outsize Toll on Mexican Health Workers. The Wall Street  
906 Journal. 2021 January 9.
- 907 21. Data OWi. Total COVID-19 tests per 1,000 people 2020 [Available from:  
908 [https://ourworldindata.org/grapher/full-list-cumulative-total-tests-per-thousand?time=2020-](https://ourworldindata.org/grapher/full-list-cumulative-total-tests-per-thousand?time=2020-02-21..latest&country=BRA~CHL~SLV~MEX~PER)  
909 [02-21..latest&country=BRA~CHL~SLV~MEX~PER](https://ourworldindata.org/grapher/full-list-cumulative-total-tests-per-thousand?time=2020-02-21..latest&country=BRA~CHL~SLV~MEX~PER).
- 910 22. Moreno T. Mexico's COVID-19 contingency plan: three key phases to fight the  
911 coronavirus outbreak  
912 . El Universal. 2020 March 14.
- 913 23. Drafting. There are 3 confirmed cases of coronavirus in Mexico. Elfinanciero. February  
914 28, 2020.
- 915 24. Expansion P. The Ministry of Health confirms the sixth case of coronavirus in Mexico.  
916 Political expansion. March 6, 2020.
- 917 25. Informer T. Massive Activities Due to Coronavirus Suspended. InformadorMx. March  
918 13, 2020.
- 919 26. Taylor L. Covid-19: How denialism led Mexico's disastrous pandemic control effort. BMJ.  
920 2020;371:m4952.
- 921 27. Agren D. Mexico holds off canceling mass gatherings amid coronavirus threat. USA  
922 Today. 2020 March 14.
- 923 28. Caicedo-Ochoa Y, Rebellón-Sánchez DE, Peñaloza-Rallón M, Cortés-Motta HF, Méndez-  
924 Fandiño YR. Effective Reproductive Number estimation for initial stage of COVID-19 pandemic  
925 in Latin American Countries. International Journal of Infectious Diseases. 2020;95:316-8.
- 926 29. Ibarra-Nava I, Cardenas-de la Garza JA, Ruiz-Lozano RE, Salazar-Montalvo RG. Mexico  
927 and the COVID-19 Response. Disaster Medicine and Public Health Preparedness.  
928 2020;14(4):e17-e8.
- 929 30. Suárez V, Suarez Quezada M, Oros Ruiz S, Ronquillo De Jesús E. Epidemiology of COVID-  
930 19 in Mexico: From the 27th of February to the 30th of April 2020. Rev Clin Esp (Barc).  
931 2020;220(8):463-71.
- 932 31. GardaWorld. Mexico: Government enters phase 2 of COVID-19 contingency plan on  
933 March 24 /update 3. GradaWorld. 2020 March 28.
- 934 32. GardaWorld. Mexico: Authorities declare health emergency as COVID-19 cases exceed  
935 1000 March 30 /update 4. GardaWorld. 2020 March 31.
- 936 33. Fredrick J. 'If Coronavirus Doesn't Kill Me, Hunger Will': Mexico's Poor Bear Brunt Of  
937 Pandemic. Npr. 2020 July 30.
- 938 34. Blust K. Sonoran authorities will enforce strict stay-at-home order through April 30.  
939 News Azpm. 2020 April 13.
- 940 35. Secretaría de Gobernación DOdIF. cuerdo por el que se establecen las medidas  
941 preventivas que se deberán implementar para la mitigación y control de los riesgos para la  
942 salud que implica la enfermedad por el virus SARS-CoV2 (COVID-19). 2020 March 24.
- 943 36. Wall SAA. Be okay with the "stay home". Psico Grupo; 2020 May 21.
- 944 37. AP. Mexico to restrict mobility to areas less affected by virus. AP News. April 16, 2020.
- 945 38. Universal E. Mexico enters Phase 3 of its contingency plan to fight COVID-19. El  
946 Universal. 2020 April 4.

- 947 39. Capistran MA, Capella A, Christen JA. Forecasting hospital demand in metropolitan areas  
948 during the current COVID-19 pandemic and estimates of lockdown-induced 2nd waves.  
949 medRxiv. 2020:2020.07.16.20155721.
- 950 40. Oré D. Exclusive: 'We're winning' - Mexico's coronavirus czar sees victory in sight.  
951 Reuters. 2020 May 5.
- 952 41. Ahmed A, Kurmanaev A, Politi D, Londoño E. Virus Gains Steam Across Latin America.  
953 NewYork Times. 2020 June 23.
- 954 42. Flores J. Did the mathematical model fail? Nexos: Nexos; 2020 [updated July 9. Available  
955 from: <https://datos.nexos.com.mx/?p=1485>.
- 956 43. Press A. Mexico President Kicks off 'New Normal' Phase Amid Pandemic. US News. 2020  
957 June 1.
- 958 44. Review TNL. Red, Orange, Yellow, Green—Go! Considerations for Reopening in Mexico:  
959 Social, Educational, and Economic Activities. The National Law Review. 2020 June 16.
- 960 45. Deakins O. Mexico's COVID-19 Traffic Light Monitoring System: News for August 17–30,  
961 2020. Ogletree Deakins. 2020 August 21.
- 962 46. Chowell G, Hincapie-Palacio D, Ospina J, Pell B, Tariq A, Dahal S, et al. Using  
963 Phenomenological Models to Characterize Transmissibility and Forecast Patterns and Final  
964 Burden of Zika Epidemics. Public Library of Science Currents.  
965 2016;8:ecurrents.outbreaks.f14b2217c902f453d9320a43a35b583.
- 966 47. Pell B, Kuang Y, Viboud C, Chowell G. Using phenomenological models for forecasting  
967 the 2015 Ebola challenge. Epidemics. 2018;22:62-70.
- 968 48. IHME. COVID-19 Projections 2020 [updated June 10. Available from:  
969 <https://covid19.healthdata.org/mexico>.
- 970 49. Apple. Mobility Trends Reports Apple2020 [cited 2020. Available from:  
971 <https://covid19.apple.com/mobility>.
- 972 50. Shu Y, McCauley J. GISAID: Global initiative on sharing all influenza data - from vision to  
973 reality. Euro surveillance : bulletin European sur les maladies transmissibles = European  
974 communicable disease bulletin. 2017;22(13):30494.
- 975 51. Banda JM, Tekumalla R, Wang G, Yu J, Liu T, Ding Y, et al. A large-scale COVID-19 Twitter  
976 chatter dataset for open scientific research -- an international collaboration. ArXiv. 2020.
- 977 52. Chowell G, Tariq A, Hyman JM. A novel sub-epidemic modeling framework for short-  
978 term forecasting epidemic waves. BioMed Central Medicine. 2019;17(1):164.
- 979 53. Shanafelt DW, Jones G, Lima M, Perrings C, Chowell G. Forecasting the 2001 Foot-and-  
980 Mouth Disease Epidemic in the UK. Ecohealth. 2018;15(2):338-47.
- 981 54. Roosa K, Lee Y, Luo R, Kirpich A, Rothenberg R, Hyman JM, et al. Short-term Forecasts of  
982 the COVID-19 Epidemic in Guangdong and Zhejiang, China: February 13-23, 2020. Journal of  
983 clinical medicine. 2020;9(2):596.
- 984 55. Roosa K, Lee Y, Luo R, Kirpich A, Rothenberg R, Hyman JM, et al. Real-time forecasts of  
985 the COVID-19 epidemic in China from February 5th to February 24th, 2020. Infectious Disease  
986 Modelling. 2020;5:256-63.
- 987 56. Richards FJ. A Flexible Growth Function for Empirical Use. Journal of Experimental  
988 Botany. 1959;10(2):290-301.
- 989 57. Banks HT, Hu S, Thompson WC. Modeling and inverse problems in the presence of  
990 uncertainty: CRC Press; 2014.

- 991 58. Chowell G. Fitting dynamic models to epidemic outbreaks with quantified uncertainty: A  
992 primer for parameter uncertainty, identifiability, and forecasts. *Infectious Disease Modelling*.  
993 2017;2(3):379-98.
- 994 59. Mathworks. lhs design [Available from:  
995 <https://www.mathworks.com/help/stats/lhsdesign.html>.  
996
- 996 60. Roosa K, Luo R, Gerardo C. Comparative assessment of parameter estimation methods  
997 in the presence of overdispersion: a simulation study. *Mathematical Biosciences and*  
998 *Engineering*. 2019;16(5):4299-313.
- 999 61. Roosa K, Chowell G. Assessing parameter identifiability in compartmental dynamic  
1000 models using a computational approach: application to infectious disease transmission models.  
1001 *Theoretical Biology and Medical Modelling*. 2019;16(1):1.
- 1002 62. M K, K. J. *Applied predictive modeling*. New York: Springer; 2013.
- 1003 63. Gneiting T, Raftery AE. Strictly Proper Scoring Rules, Prediction, and Estimation. *Journal*  
1004 *of the American Statistical Association*. 2007;102(477):359-78.
- 1005 64. Healy K. Apple's COVID Mobility Data. Github: Github; 2020.
- 1006 65. Chowell G, Abdirizak F, Lee S, Lee J, Jung E, Nishiura H, et al. Transmission characteristics  
1007 of MERS and SARS in the healthcare setting: a comparative study. *BioMed Central Medicine*.  
1008 2015;13(1):210.
- 1009 66. Anderson RM, May RM. *Infectious Diseases of Humans*. Oxford, editor. Oxford  
1010 Univeristy Press1991.
- 1011 67. Nishiura H, Chowell G, Heesterbeek H, Wallinga J. The ideal reporting interval for an  
1012 epidemic to objectively interpret the epidemiological time course. *J R Soc Interface*.  
1013 2010;7(43):297-307.
- 1014 68. Viboud C, Simonsen L, Chowell G. A generalized-growth model to characterize the early  
1015 ascending phase of infectious disease outbreaks. *Epidemics*. 2016;15:27-37.
- 1016 69. Ganyani T, Kremer C, Chen D, Torneri A, Faes C, Wallinga J, et al. Estimating the  
1017 generation interval for coronavirus disease (COVID-19) based on symptom onset data, March  
1018 2020. *Eurosurveillance*. 2020;25(17):2000257.
- 1019 70. Nishiura H, Chowell G. Early transmission dynamics of Ebola virus disease (EVD), West  
1020 Africa, March to August 2014. *Euro surveillance : bulletin European sur les maladies*  
1021 *transmissibles = European communicable disease bulletin*. 2014;19(36).
- 1022 71. H. Nishiura GC. The Effective Reproduction Number as a Prelude to Statistical Estimation  
1023 of Time-Dependent Epidemic Trends. Springer D, editor2009. 103-12 p.
- 1024 72. Paine S, Mercer G, Kelly P, Bandaranayake D, Baker M, Huang Q, et al. Transmissibility of  
1025 2009 pandemic influenza A(H1N1) in New Zealand: effective reproduction number and  
1026 influence of age, ethnicity and importations. *Euro surveillance : bulletin European sur les*  
1027 *maladies transmissibles = European communicable disease bulletin*. 2010;15(24).
- 1028 73. Fraser C. Estimating Individual and Household Reproduction Numbers in an Emerging  
1029 Epidemic. *PLOS ONE*. 2007;2(8):e758.
- 1030 74. Chong KC, Zee BCY, Wang MH. Approximate Bayesian algorithm to estimate the basic  
1031 reproduction number in an influenza pandemic using arrival times of imported cases. *Travel*  
1032 *medicine and infectious disease*. 2018;23:80-6.
- 1033 75. He X, Lau EHY, Wu P, Deng X, Wang J, Hao X, et al. Temporal dynamics in viral shedding  
1034 and transmissibility of COVID-19. *Nature Medicine*. 2020;26(5):672-5.

- 1035 76. Wallinga J, Teunis P. Different Epidemic Curves for Severe Acute Respiratory Syndrome  
1036 Reveal Similar Impacts of Control Measures. *American Journal of Epidemiology*.  
1037 2004;160(6):509-16.
- 1038 77. Cori A, Ferguson NM, Fraser C, Cauchemez S. A New Framework and Software to  
1039 Estimate Time-Varying Reproduction Numbers During Epidemics. *American Journal of*  
1040 *Epidemiology*. 2013;178(9):1505-12.
- 1041 78. Wu F, Zhao S, Yu B, Chen Y-M, Wang W, Hu Y, et al. Complete genome characterisation  
1042 of a novel coronavirus associated with severe human respiratory disease in Wuhan, China.  
1043 *bioRxiv*. 2020:2020.01.24.919183.
- 1044 79. Edgar RC. MUSCLE: multiple sequence alignment with high accuracy and high  
1045 throughput. *Nucleic Acids Res*. 2004;32(5):1792-7.
- 1046 80. Stamatakis A. RAxML version 8: a tool for phylogenetic analysis and post-analysis of  
1047 large phylogenies. *Bioinformatics*. 2014;30(9):1312-3.
- 1048 81. Suchard MA, Lemey P, Baele G, Ayres DL, Drummond AJ, Rambaut A. Bayesian  
1049 phylogenetic and phylodynamic data integration using BEAST 1.10. *Virus Evol*.  
1050 2018;4(1):vey016.
- 1051 82. Li Q, Guan X, Wu P, Wang X, Zhou L, Tong Y, et al. Early Transmission Dynamics in  
1052 Wuhan, China, of Novel Coronavirus-Infected Pneumonia. *New England Journal of Medicine*.  
1053 2020.
- 1054 83. Srivastava A, Chowell G. Understanding Spatial Heterogeneity of COVID-19 Pandemic  
1055 Using Shape Analysis of Growth Rate Curves. Preprint *medRxiv*. 2020:2020.05.25.20112433.
- 1056 84. Srivastava A, Chowell G. Understanding Spatial Heterogeneity of COVID-19 Pandemic  
1057 Using Shape Analysis of Growth Rate Curves. *medRxiv*.
- 1058 85. Srivastava A, Klassen EP. *Functional and shape data analysis*: Springer; 2016.
- 1059 86. Alliance DP. C-19 Global South observatory Mexico 2020 [Available from:  
1060 <https://datapopalliance.org/covid19/c19globalsouthobservatory/mexico/>].
- 1061 87. Chowell G, Viboud C, Hyman JM, Simonsen L. The Western Africa ebola virus disease  
1062 epidemic exhibits both global exponential and local polynomial growth rates. *PLoS currents*.  
1063 2015;7.
- 1064 88. Mendoza CI. Inhomogeneous mixing and asynchronous transmission between local  
1065 outbreaks account for the spread of COVID-19 epidemics. *medRxiv*. 2020:2020.08.04.20168443.
- 1066 89. Tariq A, Undurraga EA, Laborde CC, Vogt-Geisse K, Luo R, Rothenberg R, et al. Early  
1067 transmission dynamics of COVID-19 in Chile: From sub-exponential ascending growth dynamics  
1068 to a stationary disease wave, March-April, 2020. *medRxiv*. 2020:2020.05.15.20103069.
- 1069 90. Anzarut M, González LF, Mendizábal S, Ortiz MT. Estimating COVID-19 cases and  
1070 reproduction number in Mexico. *Arxiv*. 2020.
- 1071 91. Canals M, Cuadrado C, Canals A, Yohannessen K, Lefio LA, Bertoglia MP, et al. Epidemic  
1072 trends, public health response and health system capacity: the Chilean experience in four  
1073 months of the COVID-19 pandemic. *Rev Panam Salud Publica*. 2020;44:e99-e.
- 1074 92. Tariq A, Undurraga EA, Laborde CC, Vogt-Geisse K, Luo R, Rothenberg R, et al.  
1075 Transmission dynamics and control of COVID-19 in Chile, March-October, 2020. *medRxiv* : the  
1076 preprint server for health sciences. 2020:2020.05.15.20103069.

- 1077 93. Munayco CV, Tariq A, Rothenberg R, Soto-Cabezas GG, Reyes MF, Valle A, et al. Early  
1078 transmission dynamics of COVID-19 in a southern hemisphere setting: Lima-Peru: February  
1079 29th–March 30th, 2020. *Infectious Disease Modelling*. 2020;5:338-45.
- 1080 94. Felix FHC, Fontenele JB. Instantaneous R calculation for COVID-19 epidemic in Brazil.  
1081 *medRxiv*. 2020:2020.04.23.20077172.
- 1082 95. Acuña-Zegarra MA, Santana-Cibrian M, Velasco-Hernandez JX. Modeling behavioral  
1083 change and COVID-19 containment in Mexico: A trade-off between lockdown and compliance.  
1084 *Math Biosci*. 2020;325:108370-.
- 1085 96. Lopez O. Tourists Are Returning to Cancún. But Workers' Fears About COVID-19 Never  
1086 Went Away. *Time*. 2021 January 11.
- 1087 97. Kitroeff N. Mexico Misled Citizens About the Severity of Coronavirus in its Capital. *The*  
1088 *Newyork Times*. 2020 December 21.
- 1089 98. News T. Mexico, the Latin American country that least respects “stay at home”: mobility  
1090 report. *Televisa News*. 2020 April 7.
- 1091 99. Rueters T. Mexico officials says coronavirus cases are on a 'sustained decline'. *Rueters*.  
1092 2020 August 19.
- 1093 100. AP. Mexico reported 193,170 “excess deaths” through Sept 26. *AP*. 2020 October 25.
- 1094 101. Flannery NP. Why Are So Many People Dying Of Covid-19 In Mexico? *Forbes*. 2020  
1095 September 3.
- 1096 102. Mahase E. Covid-19: Deaths in Mexico triple since reopening began in June. *BMJ*.  
1097 2020;370:m2753.
- 1098 103. Daily MN. Covid deaths to stabilize in September, says Mexico City health minister.  
1099 *Mexico News Daily*. 2020 September 30.
- 1100 104. News B. Coronavirus: Mexico's death toll passes 30,000. *BBC News*. 2020 July 5.
- 1101 105. Gu Y. COVID-19 Projections Using Machine Learning 2020 [Available from:  
1102 <https://covid19-projections.com/mexico>.  
1103  
1104  
1105

1106

1107

1108

1109

1110

1111

1112

1113

1114

1115

1116

1117

1118

1119

1120 **Supporting Information**

1121 S1 Fig: COVID-19 deaths forecasts using daily deaths, GLM model, Mexico: 30-days ahead  
1122 forecasts based on the Generalized Logistic Growth Model (GLM) calibrated using an increasing  
1123 amount of daily death data (blue circles): 107, 114, 120, 128, 136, 151, 156, 164, 172, 179, 185,  
1124 193, 193 epidemic days. The vertical dashed line indicates the end of the calibration period and  
1125 start of the forecasting period. The mean (solid red line) and 95% PIs (dashed red lines) of the  
1126 model fit and forecast are shown.

1127 S2 Fig: COVID-19 death forecasts using daily deaths, Richards model, Mexico: 30-days ahead  
1128 forecasts based on the Richards model calibrated using an increasing amount of daily death data  
1129 (blue circles): 107, 114, 120, 128, 136, 151, 156, 164, 172, 179, 185, 193, 193 epidemic days.  
1130 The vertical dashed line indicates the end of the calibration period and start of the forecasting  
1131 period. The mean (solid red line) and 95% PIs (dashed red lines) of the model fit and forecast are  
1132 shown

1133 S3 Fig: COVID-19 death forecasts using daily deaths, GLM model, Mexico City: 30-days ahead  
1134 forecasts based on the GLM model calibrated using an increasing amount of daily death data  
1135 (blue circles): 107, 114, 120, 128, 136, 151, 156, 164, 172, 179, 185, 193, 193 epidemic days.  
1136 The vertical dashed line indicates the end of the calibration period and start of the forecasting



1137 period. The mean (solid red line) and 95% PIs (dashed red lines) of the model fit and forecast are  
1138 shown.

1139 S4 Fig: COVID-19 death forecasts using daily deaths, Richards model, Mexico City: 30-days  
1140 ahead forecasts based on the Richards model calibrated using an increasing amount of daily  
1141 death data (blue circles): 107, 114, 120, 128, 136, 151, 156, 164, 172, 179, 185, 193, 193  
1142 epidemic days. The vertical dashed line indicates the end of the calibration period and start of the  
1143 forecasting period. The mean (solid red line) and 95% PIs (dashed red lines) of the model fit and  
1144 forecast are shown.

1145 S5 Fig: COVID-19 death forecasts using daily deaths, IHME model, Mexico: 30-days ahead  
1146 forecasts based on the IHME model calibrated using an increasing amount of daily death data  
1147 (blue circles): 107, 114, 120, 128, 136, 151, 156, 164, 172, 179, 185, 193, 193 epidemic days.  
1148 The vertical dashed line indicates the end of the calibration period and start of the forecasting  
1149 period. The mean (solid red line) and 95% PIs (dashed red lines) of the model fit and forecast are  
1150 shown.

1151 S6 Fig: COVID-19 death forecasts using daily deaths, sub-epidemic wave model, Mexico: 30-  
1152 days ahead forecasts based on the sub-epidemic wave model calibrated using an increasing  
1153 amount of daily death data (blue circles): 107, 114, 120, 128, 136, 151, 156, 164, 172, 179, 185,  
1154 193, 193 epidemic days. The vertical dashed line indicates the end of the calibration period and  
1155 start of the forecasting period. The mean (solid red line) and 95% PIs (dashed red lines) of the  
1156 model fit and forecast are shown.

1157 S7 Fig: COVID-19 death forecasts using daily deaths, IHME model, Mexico City: 30-days ahead  
1158 forecasts based on the IHME model calibrated using an increasing amount of daily death data  
1159 (blue circles): 107, 114, 120, 128, 136, 151, 156, 164, 172, 179, 185, 193, 193 epidemic days.

1160 The vertical dashed line indicates the end of the calibration period and start of the forecasting  
1161 period. The mean (solid red line) and 95% PIs (dashed red lines) of the model fit and forecast are  
1162 shown.

1163 S8 Fig: COVID-19 death forecasts using daily deaths, sub-epidemic wave model, Mexico City:  
1164 30-days ahead forecasts based on the sub-epidemic wave model calibrated using an increasing  
1165 amount of daily death data (blue circles): 107, 114, 120, 128, 136, 151, 156, 164, 172, 179, 185,  
1166 193, 193 epidemic days. The vertical dashed line indicates the end of the calibration period and  
1167 start of the forecasting period. The mean (solid red line) and 95% PIs (dashed red lines) of the  
1168 model fit and forecast are shown.

1169 S9 Fig: COVID-19 deaths forecasts using cumulative deaths, GLM model, Mexico: 30-days  
1170 ahead forecasts based on the Generalized Logistic Growth Model (GLM) calibrated using an  
1171 increasing amount of cumulative death data (blue circles). The vertical dashed line indicates the  
1172 end of the calibration period and start of the forecasting period. The mean (solid red line) and  
1173 95% PIs (dashed red lines) of the model fit and forecast are shown.

1174 S10 Fig: COVID-19 death forecasts using cumulative deaths, IHME model, Mexico: 30-day  
1175 ahead forecasts based on the IHME model calibrated using cumulative death data (blue circles).  
1176 The vertical dashed line indicates the end of the calibration period and start of the forecasting  
1177 period. The mean (solid red line) and 95% PIs (dashed red lines) of the model fit and forecast are  
1178 shown.

1179 S11 Fig: COVID-19 death forecasts using cumulative deaths, Richards model, Mexico: 30-day  
1180 ahead forecasts based on the Richards model calibrated using cumulative death data (blue  
1181 circles). The vertical dashed line indicates the end of the calibration period and start of the

1182 forecasting period. The mean (solid red line) and 95% PIs (dashed red lines) of the model fit and  
1183 forecast are shown.

1184 S12 Fig: COVID-19 death forecasts using cumulative deaths, sub-epidemic wave model,  
1185 Mexico: 30-day ahead forecasts based on the Sub-epidemic wave model calibrated using  
1186 cumulative death data (blue circles). The vertical dashed line indicates the end of the calibration  
1187 period and start of the forecasting period. The mean (solid red line) and 95% PIs (dashed red  
1188 lines) of the model fit and forecast are shown.

1189 S13 Fig: COVID-19 deaths forecasts using cumulative deaths, GLM model, Mexico City: 30-day  
1190 ahead forecasts based on the Generalized Logistic Growth Model (GLM) calibrated using  
1191 cumulative death data (blue circles). The vertical dashed line indicates the end of the calibration  
1192 period and start of the forecasting period. The mean (solid red line) and 95% PIs (dashed red  
1193 lines) of the model fit and forecast are shown.

1194 S14 Fig: COVID-19 death forecasts using cumulative deaths, IHME model, Mexico City: 30-day  
1195 ahead forecasts based on the IHME model calibrated using cumulative death data (blue circles).  
1196 The vertical dashed line indicates the end of the calibration period and start of the forecasting  
1197 period. The mean (solid red line) and 95% PIs (dashed red lines) of the model fit and forecast are  
1198 shown.

1199 S15 Fig: COVID-19 death forecasts using cumulative deaths, Richards model, Mexico City: 30-  
1200 day ahead forecasts based on the Richards model calibrated using cumulative death data (blue  
1201 circles). The vertical dashed line indicates the end of the calibration period and start of the  
1202 forecasting period. The mean (solid red line) and 95% PIs (dashed red lines) of the model fit and  
1203 forecast are shown.

1204 S16 Fig: COVID-19 death forecasts using cumulative deaths, sub-epidemic wave model, Mexico  
1205 City: 30-day ahead forecasts based on the Sub-epidemic wave model calibrated using cumulative  
1206 death data (blue circles). The vertical dashed line indicates the end of the calibration period and  
1207 start of the forecasting period. The mean (solid red line) and 95% PIs (dashed red lines) of the  
1208 model fit and forecast are shown.

1209 S17 Fig: Pre-processing COVID-19 data into incidence rate functions. From left to right: original  
1210 lab-confirmed COVID-19 cases, curve of daily new cases, smoothed and scaled rate curves,  
1211 average of rate curves before scaling and smothing.

1212 S18 Fig: Clustering of states according to the shapes of their rate curves. The largest cluster –  
1213 Cluster 1 – is shown in green while the smallest cluster – Cluster 3 – is shown in the black. One  
1214 can see that states with similar shapes of rates curves are geographically close to each other.

1215 S19 Fig: Average shapes of the COVID-19 incidence rate curves, along with a one standard-  
1216 deviation band around the average, in each of the clusters.

1217 S20 Fig: Cluster averages and overall average. These averages represent the four dominant  
1218 patterns of incidence rates observed across all states.

1219 S21 Fig: Total number of COVID-19 cases as of December 5, 2020

1220 S22: COVID-19 epi-curve overlaid by the curve of stay-at-home orders tweets. Blue line  
1221 indicates the number of cases by dates of onset and the orange line indicates the number of  
1222 tweets referring to the stay-at-home orders.

1223

1224

1225

1226

1227

1228

1229

1230

1231

1232

1233

1234

1235

1236

1237

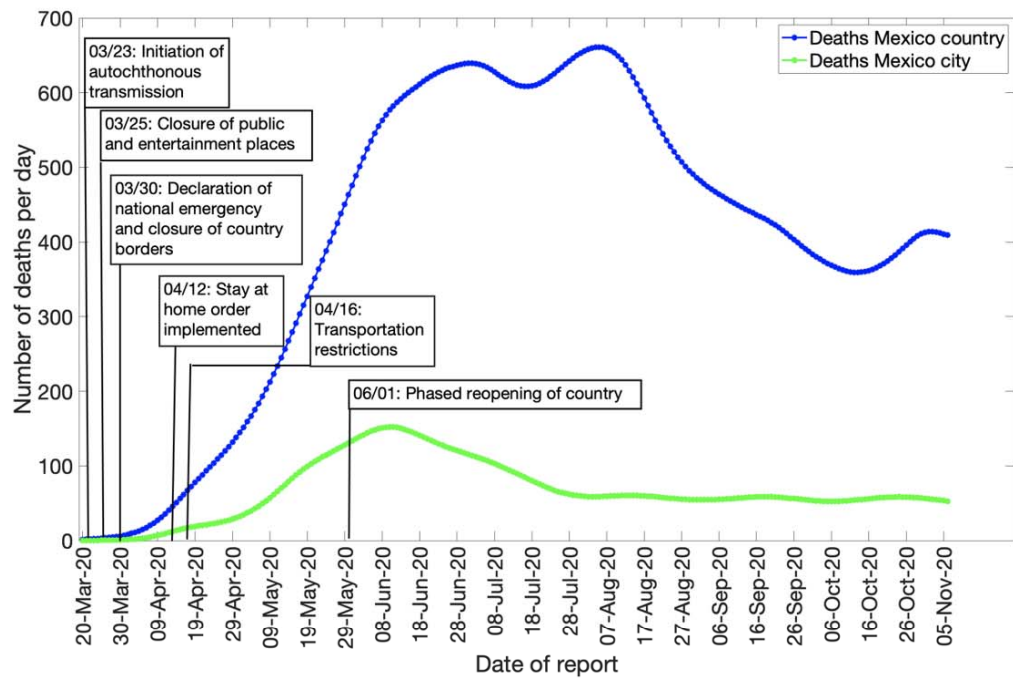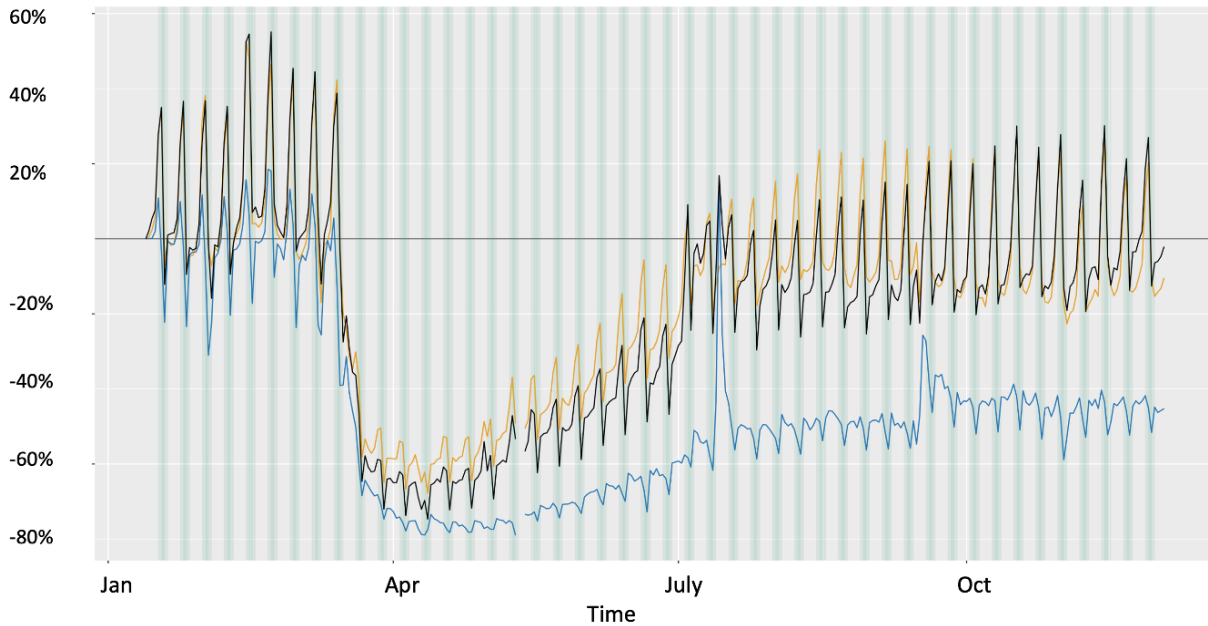

1238

1239 Fig 1: Upper panel: Epidemic curve for the COVID-19 deaths in Mexico and Mexico City from  
1240 March 20-November 11, 2020. Blue line depicts the confirmed deaths in Mexico and green line  
1241 depicts the confirmed deaths in Mexico City.

1242 Lower panel: The mobility trends for Mexico. Orange line shows the driving trend, blue line  
1243 shows the transit trend and the black line shows the walking trend.

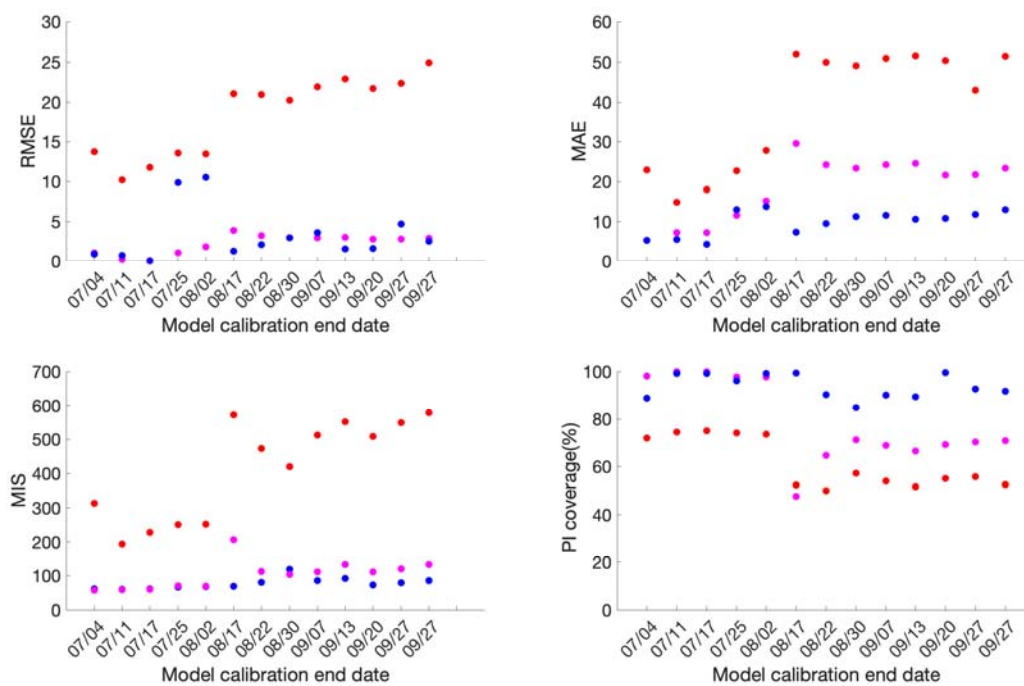

1244

1245

1246 Fig 2: Calibration performance for each of the thirteen sequential calibration phases for GLM

1247 (magenta), Richards (red) and sub-epidemic (blue) model for Mexico. High 95% PI coverage

1248 and lower mean interval score (MIS), root mean square error (RMSE) and mean absolute error

1249 (MAE) indicate better performance.

1250

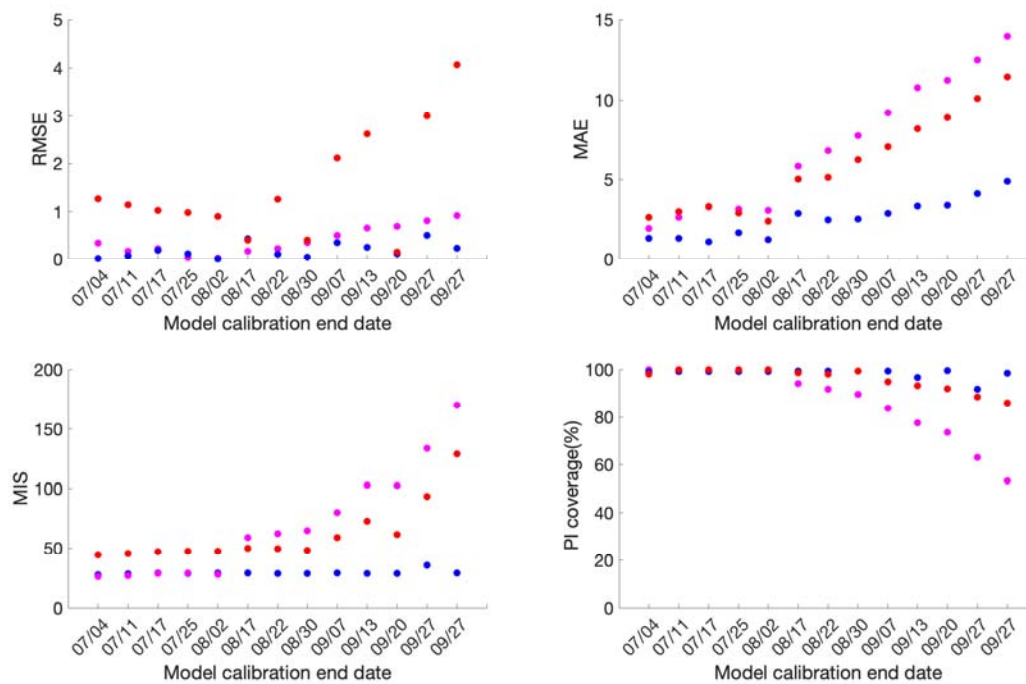

1251

1252 Fig 3: Calibration performance for each of the thirteen sequential calibration phases for GLM  
1253 (magenta), Richards (red) and sub-epidemic (blue) model for Mexico City. High 95% PI  
1254 coverage and lower mean interval score (MIS), root mean square error (RMSE) and mean  
1255 absolute error (MAE) indicate better performance.

1256



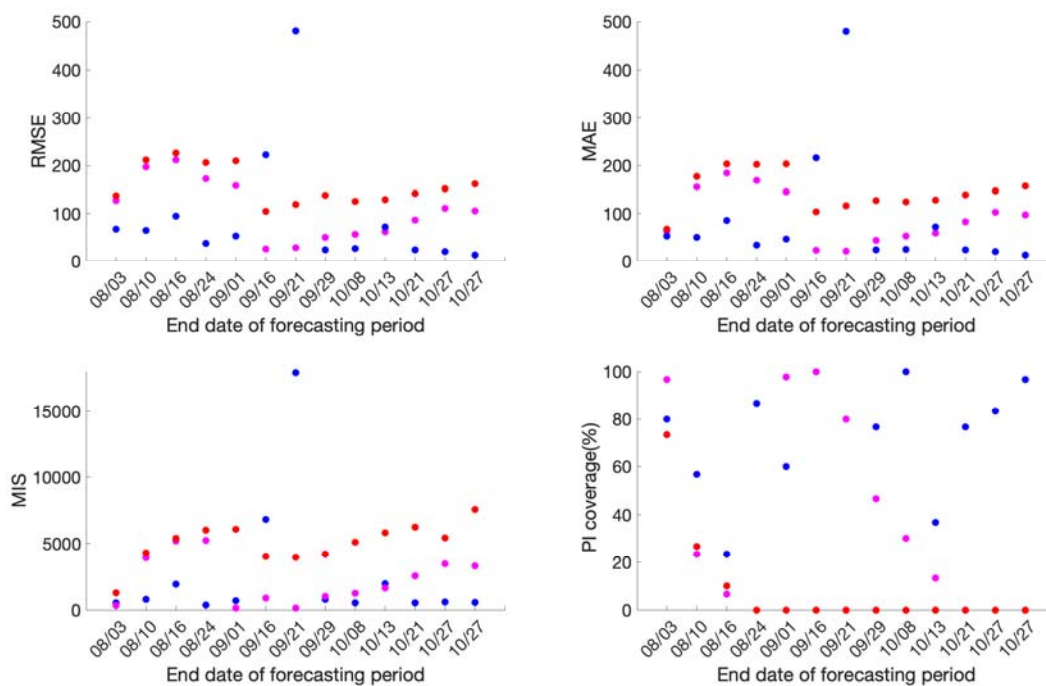

1257

1258

1259 Fig 4: Forecasting period performance metrics for each of the thirteen sequential forecasting  
1260 phases for GLM (magenta), Richards (red) and sub-epidemic (blue) model for Mexico. High  
1261 95% PI coverage and lower mean interval score (MIS), root mean square error (RMSE) and  
1262 mean absolute error (MAE) indicate better performance.

1263

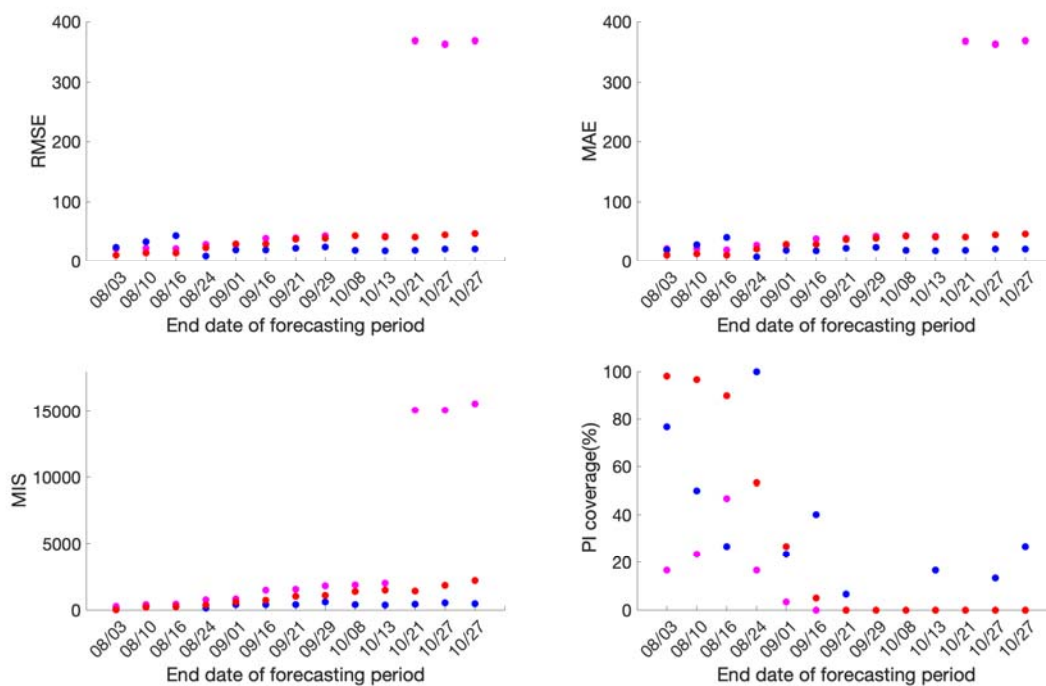

1264

1265

1266 Fig 5: Forecasting period performance metrics for each of the thirteen sequential forecasting

1267 phases for GLM (magenta), Richards (red) and sub-epidemic (blue) model for the Mexico City.

1268 High 95% PI coverage and lower mean interval score (MIS), root mean square error (RMSE) and

1269 mean absolute error (MAE) indicate better performance.

1270

1271

1272

1273

1274

1275

1276

1277

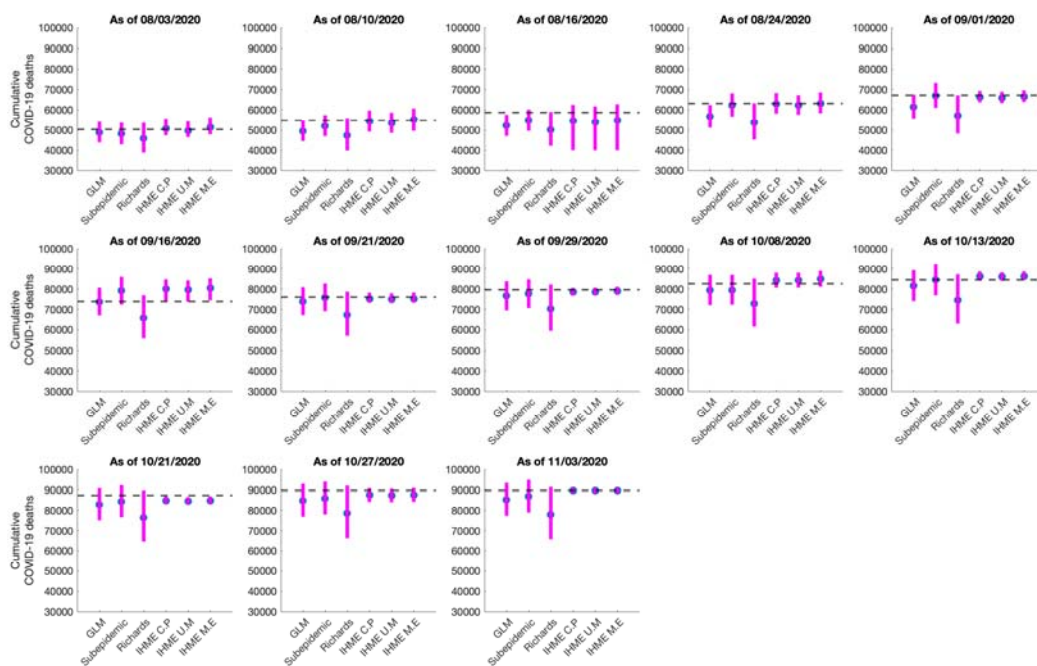

1278

1279

1280 Fig 6: Systematic comparison of the six models (GLM, Richards, sub-epidemic model, IHME  
1281 current projections (IHME C.P), IHME universal masks (IHME U.M) and IHME mandates  
1282 easing (IHME M.E)) to predict the cumulative COVID-19 deaths for Mexico in the thirteen  
1283 sequential forecasts. The blue circles represent the mean deaths and the magenta vertical line  
1284 indicates the 95% PI around the mean death count. The horizontal dashed line represents the  
1285 actual death count reported by that date in the November 11, 2020 IHME estimates files.

1286

1287

1288

1289 5

1290

1291

1292

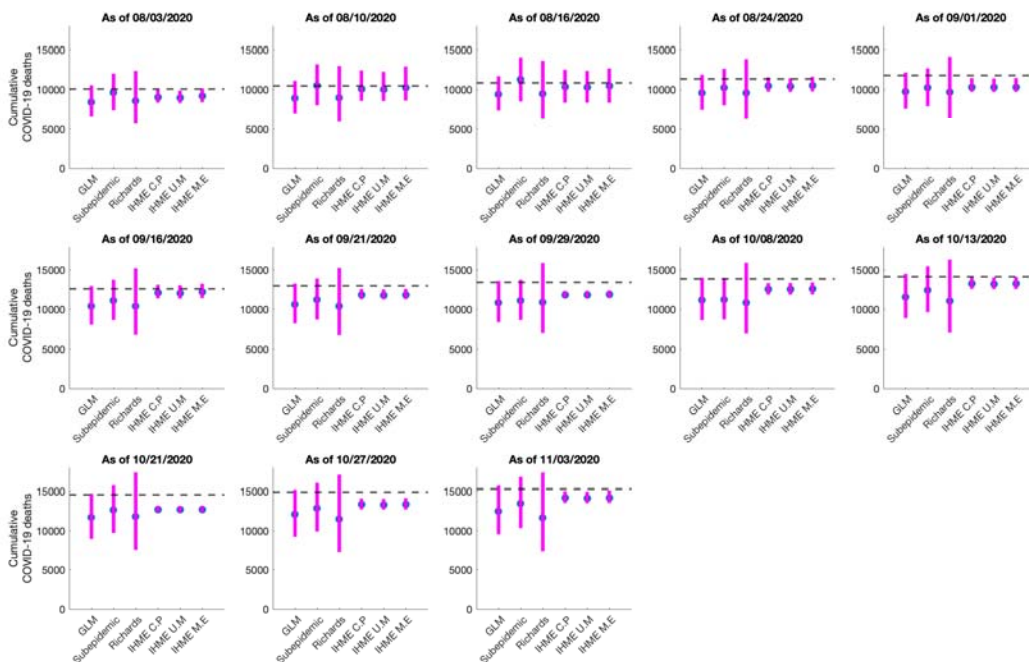

1293

1294 Fig 7: Systematic comparison of the six (GLM, Richards, sub-epidemic model, IHME current  
1295 projections (IHME C.P), IHME universal masks (IHME U.M) and IHME mandates easing  
1296 (IHME M.E))to predict the cumulative COVID-19 deaths for the Mexico City in the thirteen  
1297 sequential forecasts. The blue circles represent the mean deaths and the magenta vertical line  
1298 indicates the 95% PI around the mean death count. The horizontal dashed line represents the  
1299 actual death count reported by that date in the November 11, 2020 IHME estimates files.

1300

1301

1302

1303

1304

1305

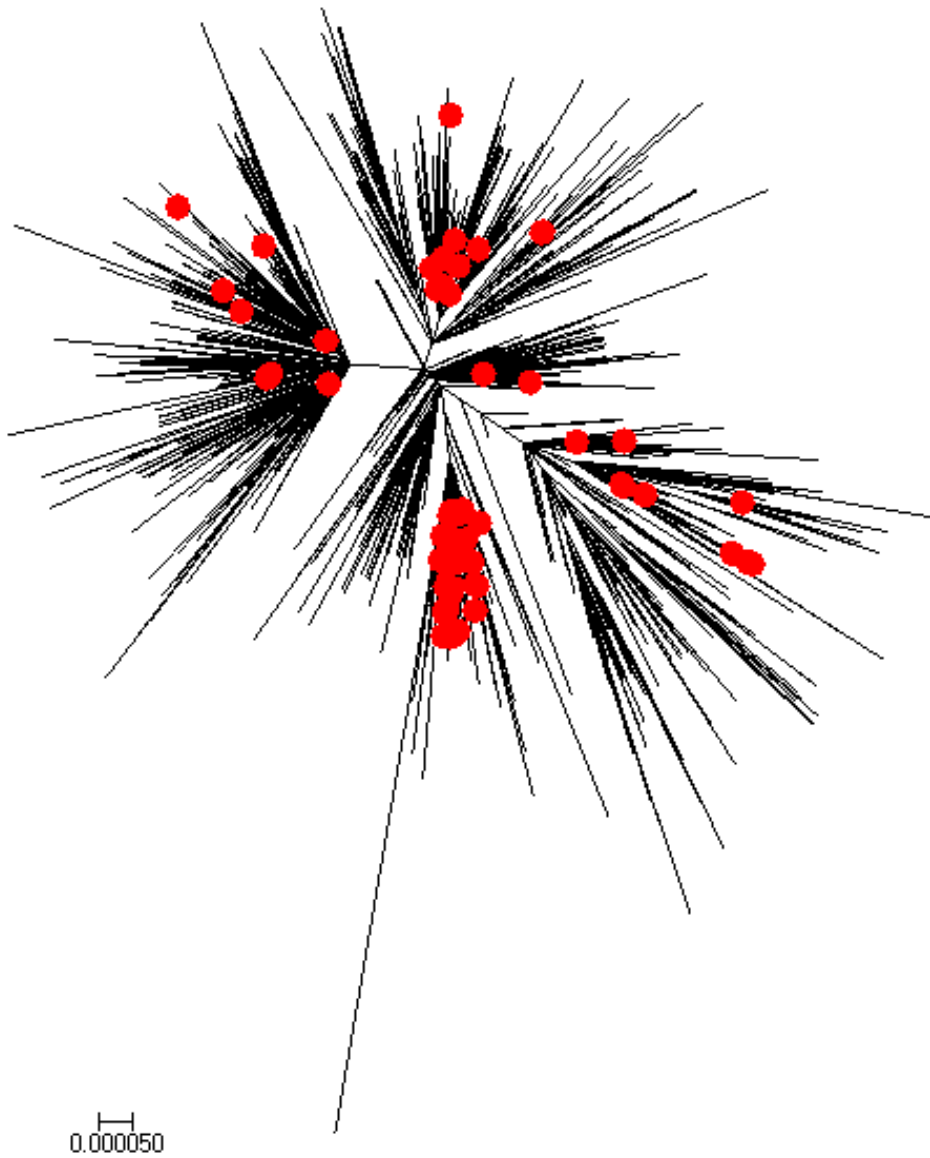

1306

1307

1308

1309

1310 Fig 8: Global neighbor-joining tree for SARS-CoV-2 genomic data from February 27- May 29,

1311 2020 . Sequences sampled in Mexico are highlighted in red.

1312

1313

1314

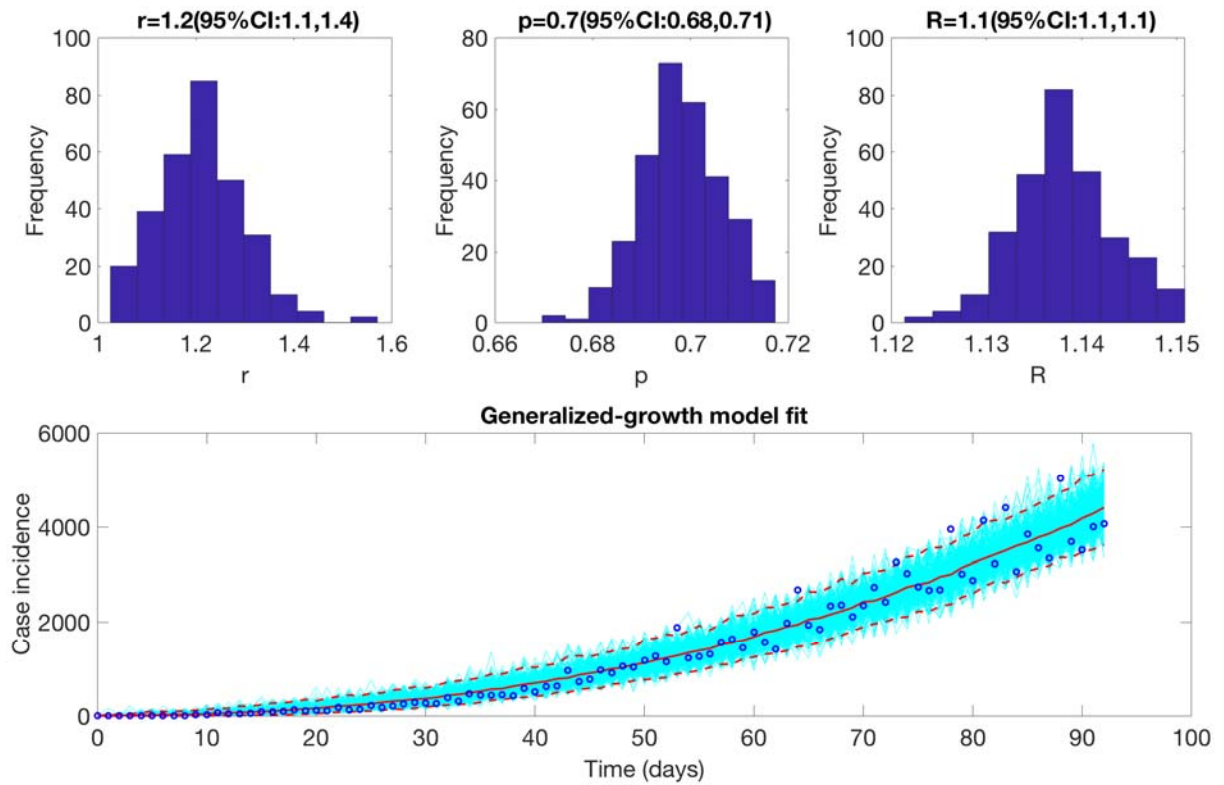

1315

1316 Fig 9: Upper panel: Reproduction number with 95% CI estimated using the GGM model. The estimated  
1317 reproduction number of the COVID-19 epidemic in Mexico as of May 29, 2020, 2020 is 1.1 (95% CI:  
1318 1.1, 1.1). The growth rate parameter,  $r$ , is estimated at 1.2(95%CI: 1.1, 1.4) and the deceleration of growth  
1319 parameter,  $p$ , is estimated at 0.7 (95%CI:0.68, 0.71).

1320 Lower panel: The lower panel shows the GGM fit to the case incidence data for the first 90 days.

1321

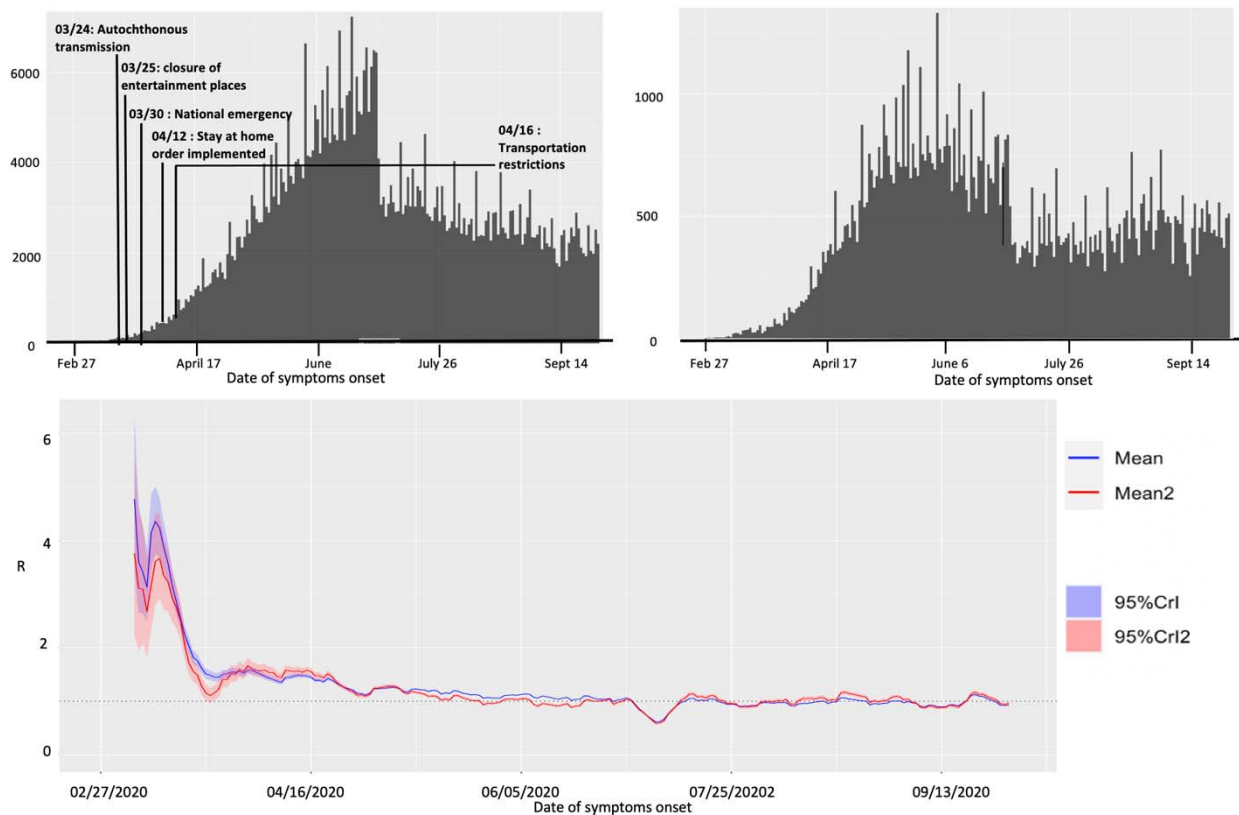

1322  
1323 Fig 10: Upper panel: Epidemiological curve (by the dates of symptom onset) for Mexico (left  
1324 panel) and Mexico City (right panel) as of September 27, 2020.

1325 Lower panel: Instantaneous reproduction number with 95% credible intervals for the COVID-19  
1326 epidemic in Mexico as of September 27, 2020. The red solid line represents the mean  
1327 reproduction number for Mexico and the red shaded area represents the 95% credible interval  
1328 around it. The blue solid line represents the mean reproduction number for the Mexico City and  
1329 the blue shaded region represents the 95% credible interval around it.

1330  
1331  
1332  
1333  
1334

1335

1336

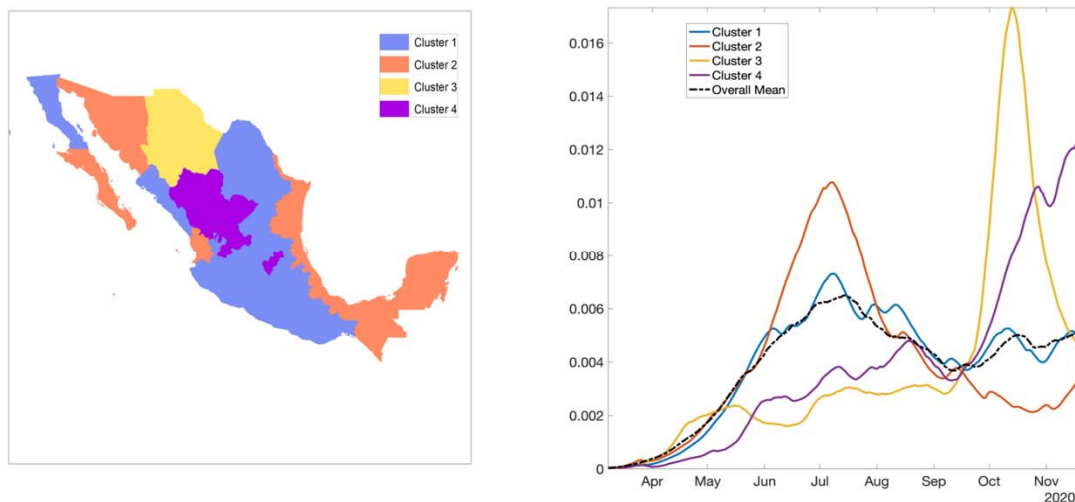

1337

1338

1339

1340 Fig 11: Clusters of states by their growth rates. Cluster 1 in blue, cluster 2 in orange, cluster 3 in  
1341 yellow, and cluster 4 in purple. The right panel shows the average growth rate curves for each  
1342 cluster (solid curves) and their overall average (black broken curve).

1343



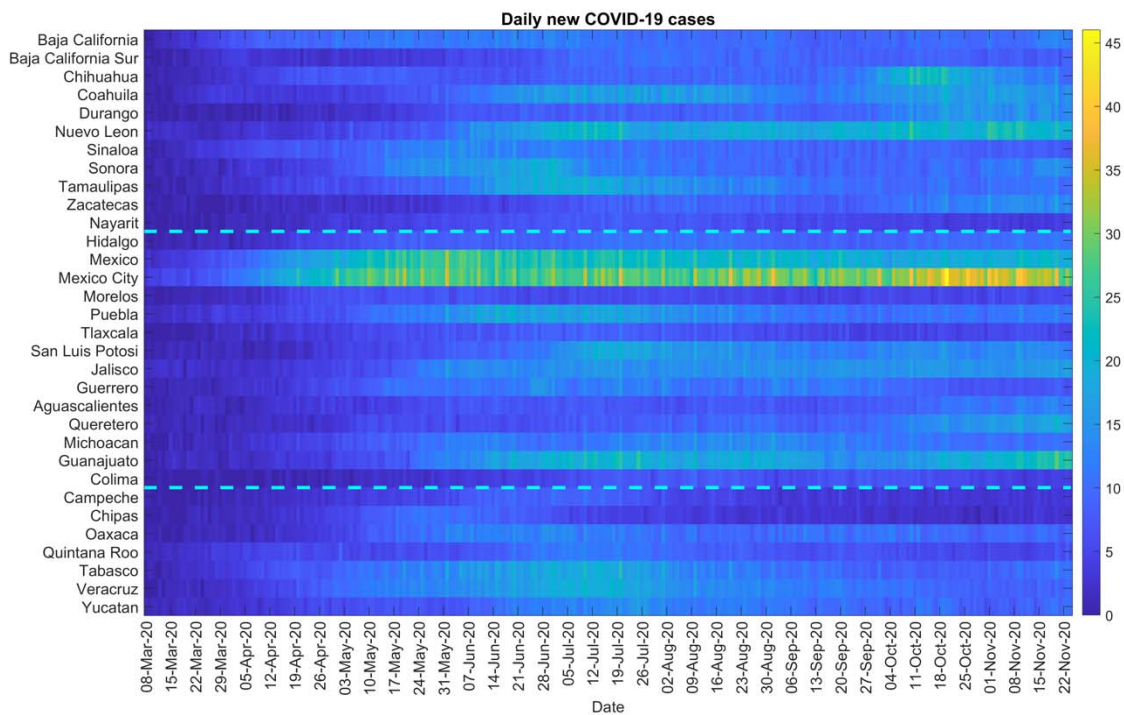

1344

1345

1346

1347 Fig 12: Color scale image of daily COVID-19 cases by region.

1348

1349

1350

1351

1352

1353

1354

1355

1356

1357
