1 **Transmission dynamics and forecasts of the COVID-19 pandemic in Mexico, March 20-**  
2 **November 11, 2020.**

3

4 **Amna Tariq<sup>1</sup>, Juan M. Banda<sup>2</sup>, Pavel Skums<sup>2</sup>, Sushma Dahal<sup>1</sup>, Carlos Castillo-Garsow<sup>3</sup>,**  
5 **Baltazar Espinoza<sup>4</sup>, Noel G. Brizuela<sup>5</sup>, Roberto A. Saenz<sup>6</sup>, Alexander Kirpich<sup>1</sup>, Ruiyan**  
6 **Luo<sup>1</sup>, Anuj Srivastava<sup>7</sup>, Humberto Gutierrez<sup>8</sup>, Nestor Garcia Chan<sup>8</sup>, Ana I. Bento<sup>9</sup>, Maria-**  
7 **Eugenia Jimenez-Corona<sup>10</sup>, Gerardo Chowell<sup>1</sup>**

8

9 <sup>1</sup> Department of Population Health Sciences, School of Public Health, Georgia State University,  
10 Atlanta, GA, USA

11 <sup>2</sup> Department of Computer Science, College of Arts and Sciences, Georgia State University,  
12 Atlanta, GA, USA

13 <sup>3</sup> Department of Mathematics, Eastern Washington University, Cheney, Washington, USA

14 <sup>4</sup> Biocomplexity Institute and Initiative, Network Systems Science and Advanced Computing  
15 Division, University of Virginia, Virginia, USA

16 <sup>5</sup> Scripps Institution of Oceanography, University of California San Diego, La Jolla, CA, USA

17

18 <sup>6</sup> Facultad de Ciencias, Universidad de Colima, Colima, Mexico

19

20 <sup>7</sup> Department of Statistics, Florida State University, Florida, USA

21 <sup>8</sup> Department of Physics, Centro Universitario de Ciencias Exactas e Ingenierias (CUCEI),

22 University of Guadalajara, Guadalajara, Mexico

23 <sup>9</sup> Department of Epidemiology and Biostatistics, School of Public Health, Indiana University

24 Bloomington, Indiana, USA

25 <sup>10</sup> Department of Epidemiology, National Institute of Cardiology "Ignacio Chavez", Mexico City,

26 Mexico

27 \* Corresponding author:

28 Email: [atariq1@student.gsu.edu](mailto:atariq1@student.gsu.edu) (AT)

29

30 **Abstract**

31 The ongoing coronavirus pandemic reached Mexico in late February 2020. Since then Mexico  
32 has observed a sustained elevation in the number of COVID-19 deaths. Mexico's delayed  
33 response to the COVID-19 pandemic until late March 2020 hastened the spread of the virus in  
34 the following months. However, the government followed a phased reopening of the country in  
35 June 2020 despite sustained virus transmission. In order to analyze the dynamics of the COVID-  
36 19 pandemic in Mexico, we systematically generate and compare the 30-day ahead forecasts of  
37 national mortality trends using various growth models in near real-time and compare forecasting  
38 performance with those derived using the COVID-19 model developed by the Institute for  
39 Health Metrics and Evaluation. We also estimate and compare reproduction numbers for SARS-  
40 CoV-2 based on methods that rely on both the genomic data as well as case incidence data to  
41 gauge the transmission potential of the virus. Moreover, we perform a spatial analysis of the  
42 COVID-19 epidemic in Mexico by analyzing the shapes of COVID-19 growth rate curves at the  
43 state level, using techniques from functional data analysis. The early estimate of reproduction  
44 number indicates sustained disease transmission in the country with  $R \sim 1.3$ . However, the  
45 estimate of  $R$  as of September 27, 2020 is  $\sim 0.91$  indicating a slowing down of the epidemic. The  
46 spatial analysis divides the Mexican states into four groups or clusters based on the growth rate  
47 curves, each with its distinct epidemic trajectory. Moreover, the sequential forecasts from the  
48 GLM and Richards model also indicate a sustained downward trend in the number of deaths for  
49 Mexico and Mexico City compared to the sub-epidemic and IHME model that outperformed the  
50 others and predict a more stable trajectory of COVID-19 deaths for the last three forecast  
51 periods.

52

53 **Author summary**

54 Mexico has been confronting the COVID-19 epidemic since late February under a fragile health  
55 care system and economic recession. The country delayed the implementation of social  
56 distancing interventions resulting in continued virus transmission in the country and reopened its  
57 economy in June 2020. In order to investigate the unfolding of the COVID-19 epidemic in  
58 Mexico and Mexico City the authors utilize the mortality data to generate and compare thirteen  
59 sequentially generated short-term forecasts using phenomenological growth models. Moreover,  
60 the reproduction number is estimated from genomic and time series data to determine the  
61 transmission potential of the epidemic, and spatial analysis using case incidence data is  
62 conducted to identify the characteristic growth patterns of the epidemic in different Mexican  
63 states including rapid increase in the growth rate followed by a rapid decline and slow growth  
64 rate followed by a rapid rise and a rapid decline. The best performing models indicate a more  
65 sustained transmission of the pandemic in Mexico. The forecasts generated from the GLM and  
66 Richards growth model indicate towards a sustained decline in the number of deaths whereas the  
67 sub-epidemic model and IHME model point towards a stable epidemic trajectory for forecasting  
68 periods as of August 23, 2020.

69

70

71

72

73

74

75

76

## 77 **Introduction**

78 The ongoing COVID-19 (coronavirus disease 2019) pandemic is a global challenge that calls for  
79 scientists, health professionals and policy makers to collaboratively address the challenges posed  
80 by this deadly infectious disease. The causative SARS-CoV-2 (severe acute respiratory  
81 syndrome virus 2) is highly transmissible via respiratory droplets and aerosols and presents a  
82 clinical spectrum that ranges from asymptomatic individuals to conditions that require the use of  
83 mechanical ventilation to multiorgan failure and septic shock leading to death [1]. The ongoing  
84 pandemic has not only exerted significant morbidity but also excruciating mortality burden with  
85 more than 79.2 million cases and 1.7 million deaths reported worldwide as of December 29,  
86 2020 [2]. Approximately 27 countries globally including 9 countries in the Americas have  
87 reported more than 10,000 deaths attributable to SARS-CoV-2 as of December 29, 2020 despite  
88 the implementation of social distancing policies to limit the death toll. In comparison, a total of  
89 774 deaths were reported during the 2003 SARS multi-country epidemic and 858 deaths were  
90 reported during the 2012 MERS epidemic in Saudi Arabia [3-5].

91

92 While effective vaccines against the novel coronavirus have begun to roll out, many scientific  
93 uncertainties exist that will dictate how vaccination campaigns will affect the course of the  
94 pandemic. For instance, it is still unclear if the vaccine will prevent the transmission of SARS-  
95 CoV-2 or just protect against more severe disease outcomes and death [6, 7]. In these  
96 circumstances epidemiological and mathematical models can help quantify the effects of non-  
97 pharmaceutical interventions including facemask wearing and physical distancing to contain the

98 COVID-19 pandemic [8]. However, recent studies have indicated that population density,  
99 poverty, over-crowding and inappropriate work place conditions hinder the social distancing  
100 interventions, propagating the unmitigated spread of the virus, especially in developing countries  
101 [9, 10]. Moreover, the differential mortality burden is also influenced by the disparate disease  
102 burden driven by the socioeconomic gradients with the poorest areas showing highest  
103 preventable mortality rates [11]. In Mexico, a highly populated country [12] with ~42% of the  
104 population living in poverty (defined as the state if a person or group of people lack a specified  
105 amount of money or material possessions) [13] and ~60% of the population working informally  
106 (jobs and workers are not protected or regulated by the state) [14], the pandemic has already  
107 exerted some of the highest COVID-19 mortality levels [15]. Mexico ranks fourth in the world in  
108 terms of the number of COVID-19 deaths, approximating a 9.8% case fatality rate (probability of  
109 dying for a person who has tested positive for the virus and is one of the most important features  
110 of the COVID-19), including the highest number of health worker deaths (~2000 deaths)  
111 reported in any country [16-18]. Mexico also remains one of the countries with the lowest  
112 number of tests conducted for COVID-19 [19].

113  
114 Mexico is fighting the COVID-19 pandemic under three phases of COVID-19 contingency  
115 identified by the Ministry of Health: Viral importation, community transmission and epidemic  
116 [20]. The COVID-19 pandemic in Mexico was likely seeded by imported COVID-19 cases  
117 reported on February 28, 2020 [21, 22]. As the virus spread across the nation in phase one of the  
118 pandemic, some universities switched to virtual classes, and some festivals and sporting events  
119 were postponed [23]. However, the government initially downplayed the impact of the virus and  
120 did not enforce strict social distancing measures. This led to large gatherings at some social

121 events such as concerts, festivals and women's soccer championship despite the sustained  
122 disease transmission in the country, with the early reproduction number estimated between ~2.9-  
123 4.9 for the first 10 days of the epidemic [24, 25]. Despite the ongoing viral transmission,  
124 pandemic was generally under-estimated in Mexico [26].

125  
126 Mexico entered phase 2 (community transmission) of the pandemic on March 24, 2020 as the  
127 virus started to generate local clusters of the disease [27, 28]. This was followed by closure of  
128 public and entertainment places along with suspension of gatherings of more than 50 people as  
129 late as March 25, 2020 [29]. Moreover, a national emergency declaration was issued on March  
130 30, 2020, halting the majority of activities around the country with the aim to mitigate the spread  
131 of the virus [30]. However, the virus continued to spread across the country, ravaging through  
132 the poor and rural communities, resulting in the delayed implementation of stay-at-home orders  
133 by the government on April 12, 2020 [31]. These preventive orders were met with mixed  
134 reactions from people belonging to different socio-economic sectors of the community [32].  
135 Moreover, restrictions on transportation to and from the regions most affected by COVID-19  
136 were not implemented until April 16, 2020 as the virus continued to spread [33]. Shortly after, on  
137 April 21, 2020, Mexico announced phase 3 of the contingency (epidemic phase) with wide-  
138 spread community transmission [34].

139  
140 With lockdowns and other restrictions in place, Mexican officials shared model output [35]  
141 predicting that COVID-19 case counts would peak in early May and that the epidemic was  
142 expected to end before July of 2020 [36]. Despite notorious disagreement between surveillance  
143 data and government forecasts, these model predictions continued to be cited by official and

144 independent sources [37, 38]. The extent to which these overly optimistic predictions skewed the  
145 plans and budgets of private and public institutions remains unknown. Under the official  
146 narrative that the pandemic would soon be over, Mexico planned a gradual phased re-opening of  
147 its economy in early June 2020, as the “new normal” phase [30].

148  
149 In Mexico, reopening of the economic activities started on June 1 under a four color traffic light  
150 monitoring system to alert the residents of the epidemiological risks based on the level of  
151 severity of the pandemic in each state on a weekly basis [39, 40]. As of December 29, 2020  
152 Mexico exhibits high estimates of cumulative COVID-19 cases and deaths; 1,401,529 and  
153 123,845 respectively [15]. Given the high transmission potential of the virus and limited  
154 application of tests in the country, testing only 24.54 people for every 1000 people (as of  
155 December 28, 2020) [19], estimates of the effective reproduction number from the case data and  
156 near real-time epidemic projections using mortality data could prove to be highly beneficial to  
157 understand the epidemic trajectory. It may also be useful to assess the effect of intervention  
158 strategies such as the stay-at-home orders and mobility patterns on the trajectory of the epidemic  
159 curve along with the spatiotemporal dynamics of the virus.

160  
161 In order to investigate the transmission dynamics of the unfolding COVID-19 epidemic in  
162 Mexico, we analyze the case data by date of symptoms onset and the death data by date of  
163 reporting using mathematical models that are useful to characterize the empirical patterns of  
164 epidemic [41, 42]. We also examine the mobility trends and their relationship with the epidemic  
165 curve for death along with estimating the effective reproduction number of SARS-CoV-2 to  
166 understand the transmission dynamics during the course of the pandemic in Mexico. Moreover,

167 we employ statistical methods from functional data analysis to study the shapes of the COVID-  
168 19 growth rate curves at the state level. This helps us characterize the spatio-temporal dynamics  
169 of the pandemic based on the shape features of these curves. Lastly, twitter data showing the  
170 frequency of tweets indicating stay-at-home-order is analyzed in relation to COVID-19 cases  
171 counts at the national level.

172

## 173 **Methods**

### 174 **Data**

175 Five sources of data are analyzed in this manuscript. A brief description of the datasets and their  
176 sources are described below.

#### 177 (i) **IHME data for short term forecasts Apple mobility trends data**

178 We utilized the openly published IHME smoothed trend in daily and cumulative COVID-19  
179 reported deaths for (i) Mexico (country) and (ii) Mexico City (capital of Mexico) as of October  
180 9, 2020 to generate the forecasts [43]. IHME smoothed data estimates were utilized as they were  
181 corrected for the irregularities in the daily death data reporting, by averaging model results over  
182 the last seven days. As this was our source of data for prediction modeling, it was chosen for its  
183 regular updates. The statistical procedure of spline regressions obtained from MR-BRT (“meta-  
184 regression—Bayesian, regularized, trimmed”) smooths the trend in COVID-19 reported deaths  
185 as described in ref [44]. This data are publicly available from the IHME COVID-19 estimates  
186 downloads page [43]. For this analysis, deaths as reported by the IHME model (current  
187 projection scenario as described ahead) on November 11, 2020 are used as a proxy for actual  
188 reported deaths attributed to COVID-19.

#### 189 (ii) **Apple mobility trends data**



190 Mobility data for Mexico published publicly by Apple’s mobility trends reports was retrieved as  
191 of December 5, 2020 [45]. This aggregated and anonymized data is updated daily and includes  
192 the relative volume of directions requests per country compared to a baseline volume on January  
193 13, 2020. Apple has released the data for the three modes of human mobility: Driving, walking  
194 and public transit. The mobility measures are normalized in the range 0-100 for each country at  
195 the beginning of the series, so trends are relative to this baseline.

### 196 (iii) Case incidence and genomic data for estimating reproduction number

197 In order to estimate the early reproduction number we use two different data sources. For  
198 estimating the reproduction number from the genomic data, 111 SARS-CoV-2 genome samples  
199 were obtained from the Global initiative on sharing all influenza data (GISAID) repository  
200 between February 27- May 29, 2020 [46]. For estimating the reproduction number from the case  
201 incidence data (early reproduction number and the effective reproduction number), we utilized  
202 publicly available time series of laboratory-confirmed cases by dates of symptom onset which  
203 were obtained from the Mexican Ministry of Health as of December 5, 2020 [15].

### 204 (iv) Case incidence data for Spatial analysis

205 We recovered daily case incidence data for all 32 states of Mexico from March 20 to December  
206 5 from the Ministry of Health Mexico, as of December 5, 2020 [15].

### 207 (v) Twitter data for twitter analysis

208 For the twitter data analysis, we retrieved data from the publicly available twitter data set of  
209 COVID-19 chatter from March 12 to November 11, 2020 [47].

210

### 211 Modeling framework for forecast generation

212 We harness three dynamics phenomenological models previously applied to various infectious  
213 diseases (e.g., SARS, pandemic influenza, Ebola [48, 49] and the current COVID-19 outbreak  
214 [50, 51]) for mortality modeling and short-term forecasting in Mexico and Mexico City. These  
215 models include the simple scalar differential equation models such as the generalized logistic  
216 growth model [49] and the Richards growth model [52]. We also utilize the sub-epidemic wave  
217 model [48] that captures complex epidemic trajectories by assembling the contribution of  
218 multiple overlapping sub-epidemic waves. The mortality forecasts obtained from these  
219 mathematical models can provide valuable insights on the disease transmission mechanisms, the  
220 efficacy of intervention strategies and the evaluation of optimal resource allocation procedures to  
221 inform public health policies. COVID-19 pandemic forecasts generated by The Institute for  
222 Health Metrics and Evaluation (IHME) are used as a competing benchmark model. The  
223 description of these models is provided in the supplementary file.

224  
225 The forecasts generated by calibrating our three phenomenological models using the IHME  
226 smoothed data estimates (reference scenario) are compared with the forecasts generated by the  
227 IHME reference scenario and two IHME counterfactual scenarios. The IHME reference scenario  
228 depicts the “current projection”, which assumes that the social distancing measures are re-  
229 imposed for six weeks whenever daily deaths reach eight per million. The second scenario  
230 “mandates easing” implies what would happen if the government continues to ease social  
231 distancing measures without re-imposition. Lastly, the third scenario, “universal masks”  
232 accounts for universal facemask wearing, that reflects 95% mask usage in public and social  
233 distancing mandates reimposed at 8 deaths per million. Detailed description of these modeling  
234 scenarios and their assumptions is explained in ref. [43].

235

## 236 **Model calibration and forecasting approach**

237 We conducted 30-day ahead short-term forecasts utilizing thirteen data sets spanned over a  
238 period of four months (July 4-October 9, 2020) (Table 1). Each forecast was fitted to the daily  
239 death counts from the IHME smoothed data estimates reported between March 20-September 27,  
240 2020 for (i) Mexico and (ii) Mexico City. The first calibration period relies on data from March  
241 20-July 4, 2020. Sequentially models are recalibrated each week with the most up-to-date data,  
242 meaning the length of the calibration period increases by one week up to August 2, 2020.  
243 However, owing to irregular publishing of data estimates by the IHME, after August 2, 2020 the  
244 length of calibration period increased by 2 weeks, followed by a one week increase from August  
245 17-September 27, 2020 as the data estimates were again published every week.

246 Table 1: Characteristics of the data sets used for the sequential calibration and forecasting of the  
247 COVID-19 pandemic in Mexico and Mexico City (2020).

248

| Date of generation/<br>of data set | Forecast<br>retrieval | Calibration period for<br>the GLM, sub-<br>epidemic, Richards<br>and IHME model | Calibration period<br>(days) | Forecast period for the<br>GLM, sub-epidemic,<br>Richards and IHME<br>model |
|------------------------------------|-----------------------|---------------------------------------------------------------------------------|------------------------------|-----------------------------------------------------------------------------|
| 07/04                              |                       | 03/20-07/04                                                                     | 107                          | 07/05-08/03                                                                 |
| 07/10                              |                       | 03/20-07/11                                                                     | 114                          | 07/12-08/10                                                                 |
| 07/17                              |                       | 03/20-07/17                                                                     | 120                          | 07/18-08/16                                                                 |
| 07/27                              |                       | 03/20-07/25                                                                     | 128                          | 07/26-08/24                                                                 |
| 08/06                              |                       | 03/20-08/02                                                                     | 136                          | 08/03-09/01                                                                 |
| 08/22                              |                       | 03/20-08/17                                                                     | 151                          | 08/18-09/16                                                                 |

|       |             |     |             |
|-------|-------------|-----|-------------|
| 08/27 | 03/20-08/22 | 156 | 08/23-09/21 |
| 09/02 | 03/20-08/30 | 164 | 08/31-09/30 |
| 09/11 | 03/20-09/07 | 172 | 09/08-10/08 |
| 09/18 | 03/20-09/13 | 179 | 09/14-10/13 |
| 09/24 | 03/20-09/20 | 185 | 09/21-10/21 |
| 10/02 | 03/20-09/27 | 193 | 09/28-10/27 |
| 10/09 | 03/20-09/27 | 193 | 09/28-10/27 |

249  
250

251 We compare the cumulative mortality forecasting results obtained from our models to the  
252 cumulative smoothed death estimates reported by IHME reference scenario as of November 11,  
253 2020. Weekly forecasts obtained from our models were compared to the forecasts obtained from  
254 the three IHME modeling scenarios for the same calibration and forecasting periods.

255

256 For each of the three models; GLM, Richards and the sub-epidemic model, we estimate the best  
257 fit solution for each model using non-linear least square fitting [53]. This process minimizes the  
258 sum of squared errors between the model fit,  $f(t, \hat{\Theta})$  and the smoothed data estimates,  $y_t$  and  
259 yields the best set of parameter estimates  $\Theta = (\theta_1, \theta_2, \dots, \theta_m)$ . The parameters  
260  $\hat{\Theta} = \underset{\Theta}{\operatorname{argmin}} \sum_{t=1}^n (f(t, \hat{\Theta}) - y_t)^2$  defines the best fit model  $f(t, \theta)$  where  
261  $\hat{\Theta} = (r, p, K_0, q \text{ and } C_{thr})$  corresponds to the set of parameters of the sub-epidemic model,  
262  $\hat{\Theta} = (r, k_0, a)$  corresponds to set of parameters of the Richards model and  $\hat{\Theta} = (r, p, k_0)$   
263 corresponds to the set of parameters of the GLM model. For the GLM and sub-epidemic wave  
264 model, we provide initial best guesses of the parameter estimates. However, for the Richards  
265 growth model, we initialize the parameters for the nonlinear least squares' method [53] over a  
266 wide range of feasible parameters from a uniform distribution using Latin hypercube sampling

267 [54] in order to test the uniqueness of the best fit model. Moreover, the initial conditions are set  
268 at the first data point for each of the three models [55]. Uncertainty bounds around the best-fit  
269 solution are generated using parametric bootstrap approach with replacement of data assuming a  
270 Poisson error structure for the GLM and sub-epidemic model, whereas a negative binomial error  
271 structure was used to generate the uncertainty bounds of the Richards growth model; where we  
272 assume the mean to be three times the variance based on the noise in the data. Detailed  
273 description of this method is provided in ref [55].

274  
275 Each of the  $M$  best-fit parameter sets are used to construct the 95% confidence intervals for each  
276 parameter by refitting the models to each of the  $M = 300$  datasets generated by the bootstrap  
277 approach during the calibration phase. Further, each  $M$  best fit model solution is used to generate  
278  $m = 30$  additional simulations with Poisson error structure for GLM and sub-epidemic model and  
279 negative binomial error structure for Richards model extended through a 30-day forecasting  
280 period. We construct the 95% prediction intervals with these 9000 ( $M \times m$ ) curves for the  
281 forecasting period. Detailed description of the methods of parameter estimation can be found in  
282 references [55-57]

283  
284 **Performance metrics**

285 We utilized the following four performance metrics to assess the quality of our model fit and the  
286 30-day ahead short term forecasts: the mean absolute error (MAE) [58], the mean squared error  
287 (MSE) [59], the coverage of the 95% prediction intervals [59], and the mean interval score (MIS)  
288 [59] for each of the three models: GLM, Richards model and the sub-epidemic model. For  
289 calibration performance, we compare the model fit to the observed smoothed death data

290 estimates fitted to the model, whereas for the performance of forecasts, we compare our forecasts  
291 with the smoothed death data reported on November 11, 2020 for the time period of the forecast.

292 The mean squared error (MSE) and the mean absolute error (MAE) assess the average deviations  
293 of the model fit to the observed death data. The mean absolute error (MAE) is given by:

$$MAE = \frac{1}{n} \sum_{i=1}^n |f(t_i, \hat{\Theta}) - y_{t_i}|$$

294 The mean squared error (MSE) is given by:

295

$$MSE = \frac{1}{n} \sum_{i=1}^n (f(t_i, \hat{\Theta}) - y_{t_i})^2$$

296 where  $y_{t_i}$  is the time series of reported smoothed death estimates,  $t_i$  is the time stamp and  $\hat{\Theta}$  is the  
297 set of model parameters. For the calibration period,  $n$  equals the number of data points used for  
298 calibration, and for the forecasting period,  $n = 30$  for the 30-day ahead short-term forecast.

299

300 Moreover, in order to assess the model uncertainty and performance of prediction interval, we  
301 use the 95% PI and MIS. The prediction coverage is defined as the proportion of observations  
302 that fall within 95% prediction interval and is calculated as:

$$PI \text{ coverage} = \frac{1}{n} \sum_{t=1}^n I\{Y_t > L_t \cap Y_t < U_t\}$$

303 where  $Y_t$  are the smoothed death data estimates,  $L_t$  and  $U_t$  are the lower and upper bounds of the  
304 95% prediction intervals, respectively,  $n$  is the length of the period, and  $I$  is an indicator variable  
305 that equals 1 if value of  $Y_t$  is in the specified interval and 0 otherwise

306

307 The mean interval score addresses the width of the prediction interval as well as the coverage.

308 The mean interval score (MIS) is given by:

309

$$MIS = \frac{1}{n} \sum_{i=1}^n (U_{t_i} - L_{t_i}) + \frac{2}{0.05} (L_{t_i} - y_{t_i}) I\{y_{t_i} < L_{t_i}\} + \frac{2}{0.05} (U_{t_i} - y_{t_i}) I\{y_{t_i} > U_{t_i}\}$$

310

311 In this equation  $L_t$ ,  $U_t$ ,  $n$  and  $I$  are as specified above for PI coverage. Therefore, if the PI  
312 coverage is 1, the MIS is the average width of the interval across each time point. For two  
313 models that have an equivalent PI coverage, a lower value of MIS indicates narrower intervals  
314 [59].

315

### 316 **Mobility data analysis**

317 In order to analyze the time series data for Mexico from March 20-December 5, 2020 for three  
318 modes of mobility; driving, walking and public transport we utilize the R code developed by  
319 Kieran Healy [60]. We analyze the mobility trends to look for any pattern in sync with the curve  
320 of COVID-19 death counts. The time series for mobility requests is decomposed into trends,  
321 weekly and remainder components. The trend is a locally weighted regression fitted to the data  
322 and remainder is any residual left over on any given day after the underlying trend and normal  
323 daily fluctuations have been accounted for.

324

### 325 **Reproduction number**

326 We estimate the reproduction number,  $R$ , for the early ascending phase of the COVID-19  
327 epidemic in Mexico and the instantaneous reproduction number  $R_t$  throughout the epidemic.  
328 Reproduction number,  $R_t$ , is a crucial parameter that characterizes the average number of  
329 secondary cases generated by a primary case at calendar time  $t$  during the outbreak. This  
330 quantity is critical to identify the magnitude of public health interventions required to contain an  
331 epidemic [61-63]. Estimates of  $R_t$  indicate if the widespread disease transmission continues  
332 ( $R_t > 1$ ) or disease transmission declines ( $R_t < 1$ ). Therefore, in order to contain an outbreak, it is  
333 vital to maintain  $R_t < 1$ .

334  
335 **Estimating the reproduction number,  $R_t$ , from case incidence using generalized growth**  
336 **model (GGM).** The GGM is a useful phenomenological model that allows relaxation of the  
337 exponential growth during early ascending phase of the outbreak via a modulating “deceleration  
338 of growth” parameter,  $p$ . The GGM is as follows:

$$\frac{dC(t)}{dt} = C'(t) = rC(t)^p$$

339 In this equation the solution  $C(t)$  describes the cumulative number of cases at time  $t$ ,  $C'(t)$   
340 describes the incidence curve over time  $t$ ,  $r$  is the growth rate and  $p \in [0, 1]$  is a “deceleration of  
341 growth” parameter. If  $p=0$ , this equation becomes constant incidence over time, whereas for  
342 cumulative cases if  $p=1$ , the equation provides an exponential solution. If  $p$  is in the  
343 intermediate range i.e.  $0 < p < 1$ , then the model solution describes the sub-exponential growth  
344 dynamics [55, 64].

345  
346 We estimate the reproduction number by calibrating the GGM (as described in the supplemental  
347 file) to the early growth phase of the epidemic (February 27-May 29, 2020) [64]. The generation



348 interval of SARS-CoV-2 is modeled assuming gamma distribution with a mean of 5.2 days and a  
349 standard deviation of 1.72 days [65]. We estimate the growth rate parameter  $r$ , and the  
350 deceleration of growth parameter  $p$ , as described above. The GGM model is used to simulate the  
351 progression of local incidence cases  $I_i$  at calendar time  $t_i$ . This is followed by the application of  
352 the discretized probability distribution of the generation interval denoted by  $\rho_i$  to the renewal  
353 equation to estimate the reproduction number at time  $t_i$  [66-68]:

354

$$R_{t_i} = \frac{I_i}{\sum_{j=0}^i (I_{i-j} \rho_j)}$$

355

356 The numerator represents the total new cases  $I_i$ , and the denominator represents the total number  
357 of cases that contribute (as primary cases) to generating the new cases  $I_i$  (as secondary cases) at  
358 time  $t_i$ . This way,  $R_t$ , represents the average number of secondary cases generated by a single  
359 case at calendar time  $t$ . The uncertainty bounds around the curve of  $R_t$  are derived directly from  
360 the uncertainty associated with the parameter estimates ( $r$ ,  $p$ ) obtained from the GGM. We  
361 estimate  $R_t$  for 300 simulated curves assuming a negative binomial error structure [55].

362

### 363 **Instantaneous reproduction number $R_t$ , using the Cori method.**

364 The instantaneous  $R_t$  is estimated by the ratio of number of new infections generated at calendar  
365 time  $t$  ( $I_t$ ), to the total infectiousness of infected individuals at time  $t$  given by  $\sum_{s=1}^t I_{t-s} w_s$  [69,  
366 70]. Hence  $R_t$  can be written as:

$$R_t = \frac{I_t}{\sum_{s=1}^t I_{t-s} w_s}$$

367

368 In this equation,  $I_t$  is the number of new infections on day  $t$  and  $w_s$  represents the infectivity  
369 function, which is the infectivity profile of the infected individual. This is dependent on the time  
370 since infection ( $s$ ), but is independent of the calendar time ( $t$ ) [71, 72].

371  
372 The term  $\sum_{s=1}^t I_{t-s} w_s$  describes the sum of infection incidence up to time step  $t - 1$ , weighted by  
373 the infectivity function  $w_s$ . The distribution of the generation time can be applied to approximate  
374  $w_s$ , however, since the time of infection is a rarely observed event, measuring the distribution of  
375 generation time becomes difficult [69]. Therefore, the time of symptom onset is usually used to  
376 estimate the distribution of serial interval (SI), which is defined as the time interval between the  
377 dates of symptom onset among two successive cases in a disease transmission chain [73].

378  
379 The infectiousness of a case is a function of the time since infection, which is proportional to  $w_s$   
380 if the timing of infection in the primary case is set as time zero of  $w_s$  and we assume that the  
381 generation interval equals the SI. The SI was assumed to follow a gamma distribution with a  
382 mean of 5.2 days and a standard deviation of 1.72 days [65]. Analytical estimates of  $R_t$  were  
383 obtained within a Bayesian framework using EpiEstim R package in R language [73].  $R_t$  was  
384 estimated at 7-day intervals. We reported the median and 95% credible interval (CrI).

385

### 386 **Estimating the reproduction number, $R$ , from the genomic analysis.**

387 In order to estimate the reproduction number for the SARS-CoV-2 between February 27- May  
388 29, 2020, from the genomic data, 111 SARS-CoV-2 genomes sampled from infected patients  
389 from Mexico and their sampling times were obtained from GISAID repository [46]. Short  
390 sequences and sequences with significant number of gaps and non-identified nucleotides were

391 removed, yielding 83 high-quality sequences. For clustering, they were complemented by  
392 sequences from other geographical regions, down sampled to n=4325 representative sequences.  
393 We used the sequence subsample from Nextstrain ([www.nextstrain.org](http://www.nextstrain.org)) global analysis as of  
394 August 15, 2020. These sequences were aligned to the reference genome taken from the  
395 literature [74] using MUSCLE [75] and trimmed to the same length of 29772 bp. The maximum  
396 likelihood phylogeny has been constructed using RAxML[76]

397  
398 The largest Mexican cluster that possibly corresponds to within-country transmissions has been  
399 identified using hierarchical clustering of sequences. The phylodynamics analysis of that cluster  
400 have been carried out using BEAST v1.10.4 [77]. We used strict molecular clock and the tree  
401 prior with exponential growth coalescent. Markov Chain Monte Carlo sampling has been run for  
402 10,000,000 iterations, and the parameters were sampled every 1000 iterations. The exponential  
403 growth rate  $f$  estimated by BEAST was used to calculate the reproductive number  $R$ . For that,  
404 we utilized the standard assumption that SARS-CoV-2 generation intervals (times between  
405 infection and onward transmission) are gamma-distributed [78]. In that case  $R$  can be estimated  
406 as  $R = \left(1 + \frac{f\sigma^2}{\mu}\right)^{\frac{\mu^2}{\sigma^2}}$ , where  $\mu$  and  $\sigma$  are the mean and standard deviation of that gamma  
407 distribution. Their values were taken from ref [65].

408  
409 **Spatial analysis.**

410 For the shape analysis of incidence rate curves we followed ref. [79] to pre-process the daily  
411 cumulative COVID-19 data at state level as follows:

- 412 a) Time differencing: If  $f_i(t)$  denotes the given cumulative number of confirmed cases for  
413 state  $i$  on day  $t$ , then per day growth rate at time  $t$  is given by  $g_i(t) = f_i(t) - f_i(t - 1)$ .

414 b) Smoothing: We then smooth the normalized curves using smooth function in Matlab.

415 c) Rescaling: Rescaling of each curve is done by dividing each  $g_i$  by the total confirmed

416 cases for a state  $i$ . That is, compute  $h_i(t) = g_i(t)/r_i$ , where  $r_i = \sum_t g_i(t)$ .

417 To identify the clusters by comparing the curves, we used a simple metric. For any two

418 rate curves,  $h_i$  and  $h_j$ , we compute the norm  $\|h_i - h_j\|$ , where the double bars denote the  $L^2$

419 norm of the difference function, i.e.  $\|h_i - h_j\| = \sqrt{\sum_t (h_i(t) - h_j(t))^2}$ .

420 This process is depicted in S17 Fig. To identify the clusters by comparing the curves, we used a

421 simple metric. For any two rate curves,  $h_i$  and  $h_j$ , we compute the norm  $\|h_i - h_j\|$ , where the

422 double bars denote the  $L^2$  norm of the difference function, i.e.  $\|h_i - h_j\| =$

423  $\sqrt{\sum_t (h_i(t) - h_j(t))^2}$ . To perform clustering of 32 curves into smaller groups, we apply the

424 dendrogram function in Matlab using the “ward” linkage as done in the previous work [80]. The

425 number of clusters is decided empirically based on the display of overall clustering results. After

426 clustering the states into different groups, we derived average curve for each cluster after using a

427 time wrapping algorithm as done in previous work [80, 81].

428

#### 429 **Twitter data analysis.**

430 To observe any relationship between the COVID-19 cases by dates of symptom onset and the

431 frequency of tweets indicating stay-at-home orders we used a public dataset of 698 Million

432 tweets of COVID-19 chatter [47]. The frequency of tweets indicating stay-at-home order is used

433 to gauge the compliance of people with the orders of staying at home to avoid spread of the virus

434 by maintaining social distance. Tweets indicate the magnitude of the people being pro-lockdown

435 and show how these numbers have dwindled over the course of the pandemic. To get to the

436 plotted data, we removed all retweets and tweets not in the Spanish language. We also filtered by  
437 the following hashtags: #quedateencasa, and #trabajardesdecasa, which are two of the most used  
438 hashtags when users refer to the COVID-19 pandemic and their engagement with health  
439 measures. Lastly, we limited the tweets to the ones that originated from Mexico, via its 2-code  
440 country code: MX. A set of 521,359 unique tweets were gathered from March 12 to November  
441 11, 2020. We then overlay the curve of tweets over the epi-curve in Mexico to observe any  
442 relation between the shape of the epidemic case trajectory and the frequency of tweets during the  
443 time period, March 12- November 11, 2020. We also estimate the correlation coefficient between  
444 the cases and frequency of tweets.

445

## 446 **Results**

447 Fig 1 (upper panel) shows the daily COVID-19 death curve in Mexico and Mexico City from  
448 March 20-November 11, 2020. As of November 11, 2020, Mexico has reported 105,656 deaths  
449 whereas Mexico City has reported 15,742 deaths as per the IHME smoothed death estimates. The  
450 mobility trend for Mexico (Fig 1, lower panel) shows that the human mobility tracked in the  
451 form of walking, driving and public transportation declined from end of March to the beginning  
452 of June, corresponding to the implementation of social distancing interventions and the *Jornada*  
453 *Nacional de Sana Distancia* that was put in place between March 23-May 30, 2020  
454 encompassing the suspension of non-essential activities in public, private and social sectors [82].  
455 The driving and walking trend subsequently increased in June with the reopening of the non-  
456 essential services. Fig 1 (upper panel) shows that reopening coincides with the highest levels of  
457 daily deaths. These remain at a high level for just over two months (June and July). Then, from

458 mid-August, the number of deaths begins to fall, reaching a reduction of nearly 50% by mid-  
459 October. But at the end of October a new growth begins.

460

461 Fig 1: Upper panel: Epidemic curve for the COVID-19 deaths in Mexico and Mexico City from  
462 March 20-November 11, 2020. Blue line depicts the confirmed deaths in Mexico and green line  
463 depicts the confirmed deaths in Mexico City.

464 Lower panel: The mobility trends for Mexico from January 1-December 5, 2020. Orange line  
465 shows the driving trend, blue line shows the transit trend, and the black line shows the walking  
466 trend.

467

468 In the subsequent sections, we first present the results for the short-term forecasting, followed by  
469 the estimation of the reproduction numbers from the early phase of the COVID-19 epidemic in  
470 Mexico and the instantaneous reproduction number. Then we present the results of the spatial  
471 analysis followed by the results of the twitter data analysis.

472

### 473 **Model calibration and forecasting**

474 Here we compare the calibration and 30-day ahead forecasting performance of our three models:  
475 the GLM, Richards growth model and the sub-epidemic wave model between March 20-  
476 September 27, 2020 for (i) Mexico and (ii) Mexico City. We also compare the results of our  
477 cumulative forecasts with the IHME forecasting estimates (for the three scenarios) obtained from  
478 the IHME data.

479

480 **Calibration performance.** Across the thirteen sequential model calibration phases for Mexico  
481 over a period of seven months (March-September), based on the calibration phases as provided  
482 in Table S1 and Fig 2, the sub-epidemic model outperforms the GLM with lower RMSE  
483 estimates for the seven calibration phases 3/20-07/04, 3/20-7/17, 3/20-8/17, 3/20-08/22, 3/20-  
484 09/13, 3/20-09/20, 3/20-09/27. The GLM model outperforms the other two models for the  
485 remaining six calibration phases in terms of RMSE. The Richards model has substantially higher  
486 RMSE (between 10.2-24.9) across all thirteen calibration phases. The sub-epidemic model also  
487 outperforms the other two models in terms of MAE, MIS and the 95% PI coverage. The sub-  
488 epidemic model shows the lowest values for MIS and the highest 95% PI coverage for nine of  
489 the thirteen calibration phases (Table S1). Moreover, the sub-epidemic model outperforms the  
490 other two models in eleven calibration phases for MAE. The Richards model shows much higher  
491 MIS and lower 95% PI coverage compared to the GLM and sub-epidemic model.

492  
493 Fig 2: Calibration performance for each of the thirteen sequential calibration phases for GLM  
494 (magenta), Richards (red) and sub-epidemic (blue) model for Mexico. High 95% PI coverage  
495 and lower mean interval score (MIS), root mean square error (RMSE) and mean absolute error  
496 (MAE) indicate better performance.

497  
498 For the Mexico City, the sub-epidemic model has the lowest RMSE for eleven of the thirteen  
499 calibration phases followed by the GLM and Richards model. The MAE is also the lowest for the  
500 sub-epidemic model for all thirteen calibration phases, followed by the GLM and Richards  
501 growth model. Further, in terms of MIS, the sub-epidemic model outperforms the Richards and  
502 GLM model for nine calibration phases whereas the GLM model outperforms the other two

503 models in four calibration phases (3/20-7/04, 3/20-7/11, 3/20-7/17, 3/20-8/02). The Richards  
504 model has much higher estimates for the MIS compared to the other two models. The 95% PI  
505 across all thirteen calibration phases lies between 91.6-99.6% for the sub-epidemic model,  
506 followed by the Richards model (85.9- 100%) and the GLM model (53.2-100%) (Table S2, Fig  
507 3).

508  
509 Fig 3: Calibration performance for each of the thirteen sequential calibration phases for GLM  
510 (magenta), Richards (red) and sub-epidemic (blue) model for Mexico City. High 95% PI  
511 coverage and lower mean interval score (MIS), root mean square error (RMSE) and mean  
512 absolute error (MAE) indicate better performance.

513  
514 Over-all the goodness of fit metrics points toward the sub-epidemic model as the most  
515 appropriate model for the Mexico City and Mexico in all four performance metrics except for the  
516 RMSE for Mexico, where the estimates of GLM model compete with the sub-epidemic model.

517  
518 **Forecasting performance.** The forecasting results for Mexico are presented in Fig 4 and Table  
519 S4. For Mexico, the sub-epidemic model consistently outperforms the GLM and Richards  
520 growth model for ten out of the thirteen forecasting phases in terms of RMSE and MAE, eight  
521 forecasting phases in terms of MIS and nine forecasting phases in terms of the 95% PI coverage.  
522 This is followed by the GLM and then the Richards growth model.

523  
524 Fig 4: Forecasting period performance metrics for each of the thirteen sequential forecasting  
525 phases for GLM (magenta), Richards (red) and sub-epidemic (blue) model for Mexico. High



526 95% PI coverage and lower mean interval score (MIS), root mean square error (RMSE) and  
527 mean absolute error (MAE) indicate better performance.

528

529 Similarly, for Mexico City, the sub-epidemic model consistently outperforms the GLM and  
530 Richards growth model for ten of the thirteen forecasting phases in terms of RMSE, MAE and  
531 MIS. Whereas, in terms of 95% PI coverage, the sub-epidemic model outperforms the Richards  
532 and GLM model in six forecasting phases, with the Richards model performing better than the  
533 GLM model (Fig 5, Table S3).

534

535 Fig 5: Forecasting period performance metrics for each of the thirteen sequential forecasting  
536 phases for GLM (magenta), Richards (red) and sub-epidemic (blue) model for the Mexico City.  
537 High 95% PI coverage and lower mean interval score (MIS), root mean square error (RMSE) and  
538 mean absolute error (MAE) indicate better performance.

539

#### 540 **Comparison of daily death forecasts**

541 The thirteen sequentially generated daily death forecasts from GLM and Richards growth model,  
542 for Mexico and Mexico City indicate towards a sustained decline in the number of deaths (S1  
543 Fig, S2 Fig, S3 Fig and S4 Fig). However, the IHME model (actual smoothed death data  
544 estimates) shows a decline in the number of deaths for the first six forecasts periods followed by  
545 a stable epidemic trajectory for the last seven forecasts, for Mexico City and Mexico. Unlike the  
546 GLM and Richards models, the sub-epidemic model is able to reproduce the observed  
547 stabilization of daily deaths observed after the first six forecast periods for Mexico and the last  
548 three forecasts for Mexico City (S5 Fig, S6 Fig, S7 Fig and S8 Fig)

549

## 550 **Comparison of cumulative mortality forecasts**

551 The total number of COVID-19 deaths is an important quantity to measure the progression of an  
552 epidemic. Here we present and compare the results of our 30-day ahead cumulative forecasts  
553 generated using GLM, Richards and sub-epidemic growth model against the actual reported  
554 smoothed death data estimates using the estimates of deaths obtained from the IHME death data  
555 reported as of November 11, 2020. Figs 6 and 7 present a comparative assessment of the  
556 estimated cumulative death counts derived from our three models along with their comparison  
557 with three IHME modeling scenarios; current projection, universal masks and mandates easing;  
558 for our thirteen sequentially generated forecasts.

559

560 Fig 6: Systematic comparison of the six models (GLM, Richards, sub-epidemic model, IHME  
561 current projections (IHME C.P), IHME universal masks (IHME U.M) and IHME mandates  
562 easing (IHME M.E) to predict the cumulative COVID-19 deaths for Mexico in the thirteen  
563 sequential forecasts. The blue circles represent the mean deaths and the magenta vertical line  
564 indicates the 95% PI around the mean death count. The horizontal dashed line represents the  
565 actual death count reported by that date in the November 11, 2020 IHME estimates files.

566

567 Fig 7: Systematic comparison of the six (GLM, Richards, sub-epidemic model, IHME current  
568 projections (IHME C.P), IHME universal masks (IHME U.M) and IHME mandates easing  
569 (IHME M.E) to predict the cumulative COVID-19 deaths for the Mexico City in the thirteen  
570 sequential forecasts. The blue circles represent the mean deaths and the magenta vertical line

571 indicates the 95% PI around the mean death count. The horizontal dashed line represents the  
 572 actual death count reported by that date in the November 11, 2020 IHME estimates files.

573  
 574 **Mexico.** The 30 day ahead forecast results for the thirteen sequentially generated forecasts for  
 575 Mexico utilizing GLM, Richards model, sub-epidemic growth model and IHME model are  
 576 presented in S9 Fig, S10 Fig, S11 Fig and S12 Fig. The cumulative death comparison is given in  
 577 Fig 6. For the first, second, third and thirteenth generated forecasts the GLM, sub-epidemic  
 578 model and the Richards model tend to underestimate the true deaths counts (~50,255, ~54,857,  
 579 ~58,604, 89,730 deaths), whereas the three IHME forecasting scenarios closely estimate the  
 580 actual death counts. For the fourth, fifth and seventh generated forecast the sub-epidemic model  
 581 and the IHME scenarios most closely approximate the actual death counts (~63,078, ~67,075,  
 582 ~76,054 deaths respectively). For the sixth generated forecast the GLM model closely  
 583 approximates the actual death count (~73,911 deaths) whereas for the tenth generated forecast  
 584 the sub-epidemic model closely approximates the actual deaths (~84,471 deaths). For the eighth,  
 585 ninth, eleventh and twelfth generated forecast GLM, Richards and sub-epidemic model tend to  
 586 under-predict the actual death counts with IHME model estimates closely approximating the  
 587 actual death counts (Table 2).

588  
 589 Table 2: Cumulative mortality estimates for each forecasting period of the COVID-19 pandemic  
 590 in Mexico (2020).

591

| Forecast Number | Forecast period | GLM Mean (95% PI) | Sub-epidemic model Mean (95% PI) | Richards model Mean (95% PI) | IHME current projections Mean (95% PI) | IHME universal mask Mean (95% PI) | IHME mandates easing Mean (95% PI) | Actual deaths reported as of Nov 11, |
|-----------------|-----------------|-------------------|----------------------------------|------------------------------|----------------------------------------|-----------------------------------|------------------------------------|--------------------------------------|
|                 |                 |                   |                                  |                              |                                        |                                   |                                    |                                      |

|    |             |                           |                           |                           |                           |                           |                           |        |
|----|-------------|---------------------------|---------------------------|---------------------------|---------------------------|---------------------------|---------------------------|--------|
|    |             |                           |                           |                           |                           |                           |                           | 2020   |
| 1  | 07/05-08/03 | 48,917<br>(43,931-54,039) | 48,110<br>(42,939-53,661) | 45,808<br>(38,808-53,665) | 50,721<br>(47,410-55,597) | 49,692<br>(46,500-54,250) | 51,299<br>(47,893-56,184) | 50,255 |
| 2  | 07/12-08/10 | 49,412<br>(44,517-49,412) | 52,085<br>(46,973-57,379) | 47,358<br>(39,836-55,808) | 54,438<br>(49,269-59,598) | 53,615<br>(48,634-58,590) | 55,176<br>(49,609-60,621) | 54,857 |
| 3  | 07/18-08/16 | 52,197<br>(47,059-57,541) | 54,758<br>(49,600-60,070) | 50,055<br>(42,161-58,892) | 54,572<br>(39,989-62,409) | 54,020<br>(39,989-61,614) | 54,749<br>(39,989-62,710) | 58,604 |
| 4  | 07/26-08/24 | 56,658<br>(51,208-62,320) | 62,271<br>(56,644-68,073) | 53,742<br>(45,332-63,144) | 62,902<br>(58,094-68,253) | 62,194<br>(57,516-67,205) | 63,116<br>(58,285-68,542) | 63,078 |
| 5  | 08/03-09/01 | 61,451<br>(55,655-67,494) | 67,010<br>(60,988-73,219) | 57,186<br>(48,270-67,114) | 66,376<br>(63,705-69,334) | 65,944<br>(63,308-68,853) | 66,582<br>(63,865-69,612) | 67,075 |
| 6  | 08/18-09/16 | 73,700<br>(66,996-80,655) | 79,144<br>(72,306-86,048) | 65,814<br>(55,834-76,954) | 80,072<br>(74,140-84,710) | 79,598<br>(73,772-84,225) | 80,537<br>(74,479-85,288) | 73,911 |
| 7  | 08/23-09/21 | 73,901<br>(67,126-80,909) | 75,809<br>(69,107-82,699) | 67,273<br>(57,061-78,667) | 75,125<br>(73,161-78,209) | 74,887<br>(72,993-77,883) | 75,160<br>(73,207-78,254) | 76,054 |
| 8  | 08/31-09/30 | 76,535<br>(69,509-83,826) | 77,629<br>(70,688-84,743) | 70,218<br>(59,490-82,174) | 78,525<br>(76,644-80,538) | 78,653<br>(76,767-80,669) | 79,016<br>(77,057-81,135) | 79,683 |
| 9  | 09/08-10/08 | 79,406<br>(72,084-87,022) | 79,491<br>(72,250-86,959) | 72,712<br>(61,556-85,135) | 84,215<br>(80,639-88,038) | 84,307<br>(80,682-88,069) | 84,937<br>(81,130-88,999) | 82,669 |
| 10 | 09/14-10/13 | 81,546<br>(74,030-89,356) | 84,561<br>(76,905-92,411) | 74,504<br>(63,026-87,292) | 86,249<br>(84,255-88,722) | 85,926<br>(83,982-88,256) | 86,249<br>(84,259-88,694) | 84,471 |
| 11 | 09/21-10/21 | 82,815<br>(75,098,90,804) | 84,392<br>(76,640-92,327) | 76,386<br>(64,579-89,556) | 84,731<br>(83,126-86,880) | 84,435<br>(82,872-86,512) | 84,731<br>(83,135-86,864) | 87,396 |
| 12 | 09/28-10/27 | 84,827<br>(76,896-93,047) | 85,885<br>(77,943-94,022) | 78,448<br>(66,244-92,090) | 87,491<br>(84,095-90,872) | 87,265<br>(83,967-90,580) | 87,522<br>(84,115-90,945) | 89,730 |
| 13 | 09/28-10/27 | 85,197<br>(77,258-93,454) | 86,850<br>(78,896-95,001) | 77,876<br>(65,750-91,401) | 89,666<br>(88,264-91,036) | 89,627<br>(88,280-91,036) | 89,667<br>(88,281-91,036) | 89,730 |

593 In summary, the Richards growth model consistently under-estimates the actual death count  
594 compared to the GLM, sub-epidemic and three IHME model scenarios. The GLM model also  
595 provides lower estimates of the mean death counts compared to the sub-epidemic and three  
596 IHME model scenarios, but higher mean death estimates than the Richards model. The 95% PI  
597 for the Richards model is substantially wider than the other two models. Moreover, the three  
598 IHME model scenarios predict approximately similar cumulative death counts across the thirteen  
599 generated forecasts, hence indicating that they do not differ substantially.

600  
601 **Mexico City.** The 30 day ahead forecast results for thirteen sequentially generated forecasts for  
602 the Mexico City utilizing GLM, Richards model, sub-epidemic growth model and IHME model  
603 are presented in S13 Fig, S14 Fig, S15 Fig and S16 Fig. The cumulative death comparison is  
604 given in Fig 7 and Table 3. For the fourth and fifth generated forecast all models under-predict  
605 the true death counts (11,326, 11,769 deaths respectively). For the first and second generated  
606 forecast the sub-epidemic model and the IHME scenarios closely approximate the actual death  
607 count (~10,081, ~10,496 deaths). For the third and sixth generated forecast GLM and Richards  
608 model underestimate the actual death count (~10,859, ~12,615 deaths respectively) whereas the  
609 sub-epidemic model over predicts the death count for the third forecast and under-predicts the  
610 death count for the sixth forecast. The three IHME model scenarios seem to predict the actual  
611 death counts closely. From the seventh-thirteenth generated forecasts, all models under-predict  
612 the actual death counts.

613  
614 Table 3: Cumulative mortality estimates for each forecasting period of the COVID-19 pandemic  
615 in Mexico City (2020).

616

| Forecast Number | Forecast period | GLM<br>Mean<br>(95%<br>PI) | Sub-epidemic model<br>Mean<br>(95% PI) | Richards model<br>Mean<br>(95% PI) | IHME current projections<br>Mean<br>(95% PI) | IHME universal mask<br>Mean<br>(95% PI) | IHME mandates easing<br>Mean<br>(95% PI) | Actual deaths reported as of Nov 11, 2020 |
|-----------------|-----------------|----------------------------|----------------------------------------|------------------------------------|----------------------------------------------|-----------------------------------------|------------------------------------------|-------------------------------------------|
| 1               | 07/05-08/03     | 8,480<br>(6,642-10,549)    | 9,655<br>(7,437-12,016)                | 8,628<br>(5,712-12,363)            | 9,075<br>(8,334-9,888)                       | 8,991<br>(8,334-9,888)                  | 9,195<br>(8,443-10,182)                  | 10,081                                    |
| 2               | 07/12-08/10     | 8,968<br>(7,022-11,119)    | 10,534<br>(8,063-13,187)               | 9,015<br>(5,951-12,971)            | 10,091<br>(8,607-12,421)                     | 10,018<br>(8,598-12,263)                | 10,254<br>(8,648-12,905)                 | 10,496                                    |
| 3               | 07/18-08/16     | 9,447<br>(7,402-11,710)    | 11,287<br>(8,541-14,037)               | 9,495<br>(6,291-13,616)            | 10,388<br>(8,382-12,505)                     | 10,323<br>(8,381-12,365)                | 10,467<br>(8,381-12,660)                 | 10,859                                    |
| 4               | 07/26-08/24     | 9,588<br>(7,478-11,891)    | 10,249<br>(8,042-12,622)               | 9,575<br>(6,283-13,836)            | 10,481<br>(9,761-11,551)                     | 10,424<br>(9,729-11,433)                | 10,526<br>(9,791-11,623)                 | 11,326                                    |
| 5               | 08/03-09/01     | 9,786<br>(7,621-12,166)    | 10,232<br>(7,950-12,686)               | 9,737<br>(6,351-14,140)            | 10,314<br>(9,746-11,477)                     | 10,290<br>(9,733-11,423)                | 10,314<br>(9,746-11,477)                 | 11,769                                    |
| 6               | 08/18-09/16     | 10,388<br>(8,054-12,957)   | 11,103<br>(8,646-13,752)               | 10,425<br>(6,762-15,212)           | 12,099<br>(11,387-13,118)                    | 12,055<br>(11,362-13,046)               | 12,184<br>(11,422-13,255)                | 12,615                                    |
| 7               | 08/23-09/21     | 10,615<br>(8,226-13,272)   | 11,205<br>(8,700-13,911)               | 10,411<br>(6,719-15,250)           | 11,826<br>(11,289-12,584)                    | 11,794<br>(11,273-12,527)               | 11,826<br>(11,290-12,585)                | 12,966                                    |
| 8               | 08/31-09/30     | 10,851<br>(8,381-13,581)   | 11,103<br>(8,646-13,752)               | 10,872<br>(6,997-15,950)           | 11,829<br>(11,397-12,328)                    | 11,842<br>(11,409-12,527)               | 11,871<br>(11,421-12,394)                | 13,414                                    |
| 9               | 09/08-10/08     | 11,182<br>(8,621-14,011)   | 11,237<br>(8,721-13,955)               | 10,820<br>(6,936-15,966)           | 12,547<br>(11,851-13,318)                    | 12,560<br>(11,859-13,340)               | 12,604<br>(11,881-13,413)                | 13,838                                    |
| 10              | 09/14-10/13     | 11,553<br>(8,887-14,492)   | 12,443<br>(9,645-15,439)               | 11,064<br>(7,043-16,373)           | 13,256<br>(12,586-14,106)                    | 13,215<br>(12,566-14,031)               | 13,256<br>(12,857-14,105)                | 14,107                                    |
| 11              | 09/21-10/21     | 11,711<br>(8,985-14,714)   | 12,636<br>(9,737-15,742)               | 11,811<br>(7,578-17,367)           | 12,727<br>(12,326-13,200)                    | 12,699<br>(12,310, 13,156)              | 12,728<br>(12,327-13,192)                | 14,561                                    |
| 12              | 09/28-10/27     | 12,074<br>(9,253-15,195)   | 12,878<br>(9,919-16,054)               | 11,503<br>(7,315-17,079)           | 13,358<br>(12,718-14,095)                    | 13,332<br>(12,705-14,049)               | 13,361<br>(12,720-14,153)                | 14,911                                    |
| 13              | 09/28-10/27     | 12,493<br>(9,570-          | 13,460<br>(10,341-                     | 11,659<br>(7,398-                  | 14,172<br>(13,539-                           | 14,131<br>(13,522-                      | 14,191<br>(14,541-                       | 15,306                                    |

|  |  |         |         |         |         |         |         |  |
|--|--|---------|---------|---------|---------|---------|---------|--|
|  |  | 15,716) | 16,815) | 17,370) | 15,031) | 14,958) | 15,128) |  |
|--|--|---------|---------|---------|---------|---------|---------|--|

617

618

619 In general, the Richards growth model has much wider 95% PI coverage compared to the other  
620 models. The mean cumulative death count estimates for the GLM and Richards model closely  
621 approximate each other for the cumulative forecasts. However, the actual mean death counts lie  
622 within the 95% PI of the GLM and sub-epidemic model for all the thirteen forecasts. The three  
623 IHME model scenarios predict approximately similar cumulative death counts across the thirteen  
624 generated forecasts with much narrow 95% PI's.

625

## 626 **Reproduction number**

627

628 **Estimate of reproduction number,  $R$  from genomic data analysis.** The majority of analyzed  
629 Mexican SARS-CoV-2 sequences (69 out of 83) have been sampled in March and April, 2020.  
630 These sequences are spread along the whole global SARS-CoV-2 phylogeny (Fig 8) and split  
631 into multiple clusters. This indicates multiple introductions of SARS-CoV-2 to the country  
632 during the initial pandemic stage (February 27- May 29, 2020). For the largest cluster of size 42,  
633 the reproduction number was estimated at  $R = 1.3$  (95% HPD interval [1.1,1.5]).

634

635 Fig 8: Global neighbor-joining tree for SARS-CoV-2 genomic data from February 27- May 29,  
636 2020. Sequences sampled in Mexico are highlighted in red.

637

638 **Estimate of reproduction number,  $R_t$  from case incidence data.** The reproduction number  
639 from the case incidence data (February 27- May 29, 2020) using GGM was estimated at

640  $R_t \sim 1.1$  (95% CI: 1.1, 1.1), in accordance with the estimate of  $R_t$  obtained from the genomic data  
641 analysis. The growth rate parameter,  $r$ , was estimated at 1.2 (95% CI: 1.1, 1.4) and the  
642 deceleration of growth parameter,  $p$ , was estimated at 0.7 (95% CI: 0.68, 0.71), indicating early  
643 sub-exponential growth dynamics of the epidemic (Fig 9).

644

645 Fig 9: Upper panel: Reproduction number with 95% CI estimated using the GGM model. The  
646 estimated reproduction number of the COVID-19 epidemic in Mexico as of May 29, 2020 is 1.1  
647 (95% CI: 1.1, 1.1). The growth rate parameter,  $r$ , is estimated at 1.2 (95% CI: 1.1, 1.4) and the  
648 deceleration of growth parameter,  $p$ , is estimated at 0.7 (95% CI: 0.68, 0.71).

649 Lower panel: The lower panel shows the GGM fit to the case incidence data for the first 90 days.

650

651 **Estimate of instantaneous reproduction number,  $R_t$ .** The instantaneous reproduction number  
652 for Mexico remained consistently above 1.0 until the end of May 2020, after which the  
653 reproduction number has fluctuated around 1.0 with the estimate of  $R_t \sim 0.93$  (95% CrI: 0.91,  
654 0.94) as of September 27, 2020. For Mexico City, the reproduction number remained above 1.0  
655 until the end of June after which it has fluctuated around 1.0 with the estimate of  $R_t \sim 0.96$  (95%  
656 CrI: 0.93, 0.99) as of September 27, 2020 (Fig 10).

657

658 Figure 10: Upper panel: Epidemiological curve (by the dates of symptom onset) for Mexico (left  
659 panel) and Mexico City (right panel) as of September 27, 2020.

660 Lower panel: Instantaneous reproduction number with 95% credible intervals for the COVID-19  
661 epidemic in Mexico as of September 27, 2020. The red solid line represents the mean  
662 reproduction number for Mexico and the red shaded area represents the 95% credible interval



663 around it. The blue solid line represents the mean reproduction number for the Mexico City and  
664 the blue shaded region represents the 95% credible interval around it.

665

## 666 **Spatial analysis**

667 Fig S17 shows the result from pre-processing COVID-19 data into growth rate functions. The  
668 results of clustering are shown in Fig S18 as a dendrogram plot and the states color coded based  
669 on their cluster membership within the map of Mexico (Fig 11; left panel). The four predominant  
670 clusters we identified include the following states:

671 Cluster 1: Baja California, Coahuila, Colima, Mexico City, Guanajuato, Guerrero, Hidalgo,  
672 Jalisco, Mexico, Michoacán, Morelos, Nuevo Leon, Oaxaca, Puebla, San Luis Potosi, Sinaloa,  
673 and Tlaxcala

674 Cluster 2: Baja California Sur, Campeche, Chiapas, Nayarit, Quintana Roo, Sonora, Tabasco,  
675 Tamaulipas, Veracruz, and Yucatan

676 Cluster 3: Chihuahua

677 Cluster 4: Aguascalientes, Durango, Queretaro, and Zacatecas

678 Figure 11: Clusters of states by their growth rates. Cluster 1 in blue, cluster 2 in orange, cluster 3  
679 in yellow, and cluster 4 in purple. The right panel shows the average growth rate curves for each  
680 cluster (solid curves) and their overall average (black broken curve).

681

682 Fig 11(right panel) shows the average shape of growth rate curves in each cluster and the overall  
683 average. Fig S19 shows mean growth rate curves and one standard-deviation bands around it, in  
684 each cluster. Since cluster 3 included only one state, average growth rate of cluster 1, cluster 2,  
685 and cluster 4 are shown. The average growth patterns in the three categories are very distinct and

686 clearly visible. For cluster 1, the rate rises rapidly from April to July and then shows small  
687 fluctuations. For cluster 2, there is rapid increase in growth rate from April to July followed by a  
688 rapid decline. Chihuahua in cluster 3 shows a slow growth rate until September followed by a  
689 rapid rise until mid-September which then declines rapidly. For cluster 4, the rate rises slowly,  
690 from April to September, and then shows a rapid rise (Fig S20).

691  
692 From the colormap (Fig 12) we can see that the cases were concentrated from the beginning in  
693 the central region in Mexico and Mexico City. Daily cases have been square root transformed to  
694 reduce variability in the amplitude of the time series while dashed lines separate the Northern,  
695 Central, and Southern regions. Fig S20 shows the timeseries graph of daily COVID-19 new cases  
696 by the date for all states, Northern states, Central states, and the Southern states. As observed for  
697 both Northern and Central regions including the national level, the epidemic peaked in mid-July  
698 followed by a decline at around mid-September, which then started rising again. Southern states  
699 exhibit a stable decline. Fig S21 shows the total number of COVID-19 cases at state level as of  
700 December 5, 2020.

701 Some of the areas with a higher concentration of COVID-19 cases are: Mexico City, Mexico  
702 state, Guanajuato in the central region and, Nuevo Leon in the Northern region.

703

704 Fig 12: Color scale image of daily COVID-19 cases by region.

705

### 706 **Twitter data analysis**

707 The epicurve for Mexico is overlaid with the curve of tweets indicating stay at home orders in  
708 Mexico as shown in S22 Fig. The engagement of people in Mexico with the #quedateencasa

709 hashtag (stay-at-home order hashtag) has been gradually declining as the number of cases have  
710 continued to increase or remain at a steady pace, showing the frustration of public on the  
711 relaxation of lock downs. Mostly the non-government public health experts are calling for more  
712 lockdowns or social distancing measures but are not being heard by the authorities. It could also  
713 imply that the population is not following the government's stay at home orders and hence we  
714 continue to observe the cases. S22 Fig shows that the highest number of tweets were made in the  
715 earlier part of the epidemic, with the number of tweets decreasing as of June 2020. In contrast,  
716 the number of cases by onset dates peaked around mid-June. The correlation coefficient between  
717 the epicurve of cases by dates of onset and the curve of tweets representing the stay-at-home  
718 orders was estimated at  $R=-0.001$  from March 12- November 11, 2020.

719

## 720 **Discussion**

721 The results of our GLM model fit to the death data for all the thirteen calibration phases and  
722 GGM fit to the case incidence data indicate sub-exponential growth dynamics of COVID-19  
723 epidemic in the Mexico and Mexico City with the parameter  $p$  estimated between ( $p\sim 0.6-0.8$ ).  
724 Moreover, the early estimates of  $R$  indicate towards sustained disease transmission in the country  
725 with  $R_t$  estimated at 0.9 as of September 27, 2020. As the virus transmission continues in  
726 Mexico, the twitter analysis implies the relaxation of lockdowns, with not much decline in the  
727 mobility patterns observed over the last few weeks as evident from the Apple's mobility trends.  
728 Moreover, the systematic comparison of our models across thirteen sequential forecasts deem  
729 sub-epidemic model as the most appropriate model for mortality forecasting. The sub-epidemic  
730 model is also able to reproduce the stabilization in the trajectory of mortality forecasts as  
731 observed by the most recent IHME forecasts.

732

733 The sub-exponential growth pattern of the COVID-19 epidemic in Mexico can be attributed to a  
734 myriad of factors including non-homogenous mixing, spatial structure, population mobility,  
735 behavior changes and interventions [83]. These results are also consistent with the sub-  
736 exponential growth patterns of COVID-19 outbreaks observed in Mexico [84] and Chile [85].  
737 Along with the sub-exponential growth dynamics, the reproduction number estimated from the  
738 genomic sequence analysis and the case incidence data ( $R_t \sim 1.1-1.2$ ) indicate towards sustained  
739 transmission of SARS-CoV-2 in Mexico during the early transmission phase of the virus  
740 (February 27- May 29, 2020), with similar estimates of reproduction number retrieved from  
741 another study in Mexico [86] and Chile for the same time period [87]. These estimates of  $R_t$  are  
742 similar to those derived for other Latin American countries including Peru, Chile and Brazil that  
743 have observed similar outbreaks of COVID-19 in the surrounding regions [85, 88]. The early  
744 estimate of  $R_t$  obtained from the Cori et al. method also coincides with the early estimates of  $R_t$   
745 obtained from the case incidence data and the genomic data ( $R_t \sim 1$ ). The instantaneous  
746 reproduction number estimated from our study shows that  $R_t$  is slightly above 1 since the end of  
747 March, without a significant increase. This is in accordance with the estimates of  $R_t$  obtained  
748 from another study conducted in Mexico [89].

749

750 In general, Mexico has seen a sustained SARS-CoV-2 transmission and an increase or a  
751 sustained steady number of cases despite the social distancing interventions including the stay-at-  
752 home orders that were declared on April 12, 2020 and eased around June 2020. As our twitter  
753 data analysis also shows, the number of cases by onset dates was negatively correlated to the  
754 stay-at-home orders, indicating population's frustration towards the stay-at-home orders and

755 reopening the country resulting in pandemic fatigue. Hence, people might have stopped  
756 following the government's preventive orders to stay at home. Mexico has been one of the  
757 countries where the stay-at-home orders have been least respected, with an average reduction in  
758 mobility in Mexico reported to be ~35.4% compared to 71% in Brazil, and 86% in Argentina and  
759 Colombia [90]. The intensity of these orders have affected the population disproportionately,  
760 with some proportion of the population showing aggression towards quarantine and stay-at-home  
761 orders [32]. We can also appreciate the variable spatial-temporal dynamics of the COVID-19  
762 epidemic in Mexico. Our classification of epidemic pattern at the state level in Mexico shows  
763 distinct variation of growth rates across states. For instance, cluster 1 including Baja California,  
764 Colima and Mexico City has stable growth at a higher rate and cluster 4 including  
765 Aguascalientes, Durango, Queretaro, and Zacatecas shows a rising pattern in the growth rate  
766 (Figure 11). This information can be used by the states in guiding their decision regarding the  
767 public health measures. For example, states in cluster 1 and 4 may need strict public health  
768 measures to contain the epidemic.

769  
770 We compared the performance of our three models for short-term real-time forecasting the  
771 COVID-19 death estimates in Mexico and Mexico City. As in Fig 2-5 the sub-epidemic model  
772 can be declared the most appropriate model as it exhibits the most desirable performance metrics  
773 across majority of the calibration and forecasting phases. This model has the capacity to  
774 accommodate more complex trajectories suggesting a longer epidemic wave and can better  
775 adjust to the early signs of changes in transmission of the disease, while other models (GLM and  
776 Richards) are less reactive. This model can also be utilized as a potential forecasting tool for  
777 other cities in Mexico and compared with other models. Moreover, shorter forecasts (5,10 days)

778 could be also be conducted with the sub-epidemic model using the consecutive calibration  
779 phases to further reduce the error metrics [48].

780

781 Overall, the sequential forecasts based on the daily smoothed death estimates for Mexico from  
782 the two models (GLM, Richards) suggest a decline in over-all deaths (S1 Fig and S2 Fig)  
783 consistent with the sustained decline in COVID-19 associated case fatalities since mid-August as  
784 reported by the Mexican government officially [91]. However, this decline in COVID-19 deaths  
785 can be attributed to the inaccurate reporting of deaths in the surveillance system or downplay of  
786 fatalities by the government. For instance, the reported excess deaths as of September 26, 2020  
787 are estimated to be 193170, with 139151 attributable to COVID-19 [92]. While the official tally  
788 of COVID-19 deaths in Mexico is only exceeded by USA and Brazil, its roughly approximated  
789 with that of India, a country whose population is ten times larger than Mexico [93]. As observed  
790 earlier, the easing of the social distancing interventions and lifting of lockdowns in Mexico in the  
791 month of June led to a surge of the COVID-19 associated deaths [94]. In June, the government of  
792 Mexico also inaccurately forecasted a potential decline in the number of COVID-19 deaths to  
793 occur in September [95]. Therefore, the forecasting trends need to be interpreted cautiously in  
794 order to inform policies. The IHME model also shows a decline in COVID-19 deaths in Mexico  
795 from mid-August-September, which have stabilized since then for the last six forecast periods  
796 (S5 Fig). The sub-epidemic model also indicates a stabilization of the deaths for the last seven  
797 forecast periods (S6 Fig) consistent with the results of the IHME model.

798

799 Similarly, for Mexico City, the sequential forecasts obtained from the GLM and Richards model  
800 fit to the daily death data estimates indicate a decline in the overall deaths (S3 Fig, S4 Fig). The

801 IHME and sub-epidemic models on the other hand indicate a stabilized trajectory of deaths for  
802 the last three forecast periods (S7 Fig and S8 Fig) (suggesting that the actual death counts might  
803 not be decreasing in Mexico City) as seen with Mexico. Based on the death data, the observed  
804 decline or stability in death predictions could likely reflect the false slowing down of the  
805 epidemic in Mexico City [94]. Moreover, insufficient testing can also result in an inaccurate  
806 trajectory of the COVID-19 death curve [96].

807  
808 The cumulative comparison of deaths in Mexico and Mexico City indicates that in general, the  
809 Richards model has under-performed in predicting the actual death counts with much wider  
810 uncertainty around the mean death estimates. The Richards model has also failed to capture the  
811 early sub-exponential dynamics of the death curve. The cumulative death counts obtained from  
812 the flexible sub-epidemic model closely approximate the cumulative death counts obtained from  
813 the three IHME modeling scenarios. Whereas the GLM slightly under predicts the cumulative  
814 death counts (Fig 6, Fig 7). On the other hand the COVID-19 predictions model projects 87,151  
815 deaths (95% PI:84,414, 91,883) for Mexico as of October 27, 2020 (last forecasting phase), an  
816 estimate that closely approximates the estimates obtained from the GLM model (between  
817 77,258-93,454 deaths) [97].

818  
819 The three models (GLM, Richards, sub-epidemic model) used in this study generally provide  
820 good fits to the mortality curve, based on the residuals, with the Richards model unable to  
821 capture the early sub-exponential dynamics of the death curve. Moreover, these  
822 phenomenological models are particularly valuable for providing rapid predictions of the  
823 epidemic trajectory in complex scenarios that can be used for real-time preparedness since these

824 models do not require specific disease transmission processes to account for the interventions.  
825 Since these models do not explicitly account for behavioral changes, the results should be  
826 interpreted with caution. Importantly, since the death curves employed in this study are reported  
827 according to the date of reporting, they are likely influenced by variation in the testing rates and  
828 related factors including the case fatality rates. Further, delays in reporting of deaths due to the  
829 magnitude of the epidemic could also influence our predictions. Moreover, using the reporting  
830 date is not ideal, due to the time difference between the death date and the reporting date of  
831 death, which at a given moment can give a false impression of the ongoing circumstances.

832  
833 This paper is not exempt from limitations. First, the IHME (current projections, mandated mask,  
834 and worst-case scenario) model utilized has been revised multiple times over the course of the  
835 pandemic and differs substantially in methodology, assumptions, range of predictions and  
836 quantities estimated. Second, the IHME has been irregular in publishing the downloadable  
837 estimates online for some periods. Third, we model the death estimates by date of reporting  
838 rather than by the date of death. Lastly, the unpredictable social component of the epidemic on  
839 ground is also a limiting factor for the study as we do not know the ground truth death pattern  
840 when the forecasts are generated.

841  
842 In conclusion, the reproduction number has been fluctuating around  $\sim 1.0$  from end of July-end of  
843 September 2020, indicating sustained virus transmission in the region, as the country has seen  
844 much lower mobility reduction and mixed reactions towards the stay-at-home orders. Moreover,  
845 the spatial analysis indicates that states like Mexico, Michoacán, Morelos, Nuevo Leon, Baja  
846 California need much strict public health measures to contain the epidemic. The GLM and sub-



847 epidemic model applied to mortality data in Mexico provide reasonable estimates for short-term  
848 projections in near real-time. While the GLM and Richards models predict that the COVID-19  
849 outbreak in Mexico and Mexico City may be on a sustained decline, the sub-epidemic model and  
850 IHME model predict a stabilization of daily deaths. However, our forecasts need to be  
851 interpreted with caution given the dynamic implementation and lifting of the social distancing  
852 measures.

853  
854 **Author Contributions:** Conceptualization, G.C. and A.T.; methodology, G.C, A.T.; validation,  
855 G.C.; formal analysis, A.T., G.C.; investigation, A.T. S.D., J.M.B., P.S. ; resources, G.C., A.T.  
856 J.M.B., B.E. A.B, P.S; data curation, A.T.; writing—original draft preparation, A.T., G.C.;  
857 writing, review and editing, A.T., G.C., J.M.B., P.S., S.D., C.C.G, B.E., N.G.B., R.A.S, A.K,  
858 R.L, A.S, H.G., N.G.C., A.I.B., M.E.J; visualization, A.T., G.C.; supervision, G.C.; project  
859 administration, G.C.; funding acquisition, G.C. All authors have read and agreed to the published  
860 version of the manuscript.

861  
862 **Funding:** G.C. is partially supported from NSF grants 1610429 and 1633381 and R01 GM  
863 130900.

864  
865 **Acknowledgements**

866 We thank the 2CI fellowship from Georgia State University.

867  
868 **Conflicts of Interest:** The authors declare no conflict of interest.

869  
870 **References**

- 871 1. Cascella M, Rajnik M, Cuomo A, Dulebohn SC, Di Napoli R. Features, Evaluation, and  
872 Treatment of Coronavirus (COVID-19). StatPearls. Treasure Island (FL): StatPearls Publishing  
873 Copyright © 2020, StatPearls Publishing LLC.; 2020.
- 874 2. COVID-19 coronavirus / cases [Internet]. 2020. Available from:  
875 <https://www.worldometers.info/coronavirus/coronavirus-cases/>.
- 876 3. WHO. Situation Reports Coronavirus World Health Organization2020 [Available from:  
877 <https://www.who.int/emergencies/diseases/novel-coronavirus-2019/situation-reports>.
- 878 4. WHO. Summary of probable SARS cases with onset of illness from 1 November 2002 to  
879 31 July 2003 2003 [Available from: [https://www.who.int/csr/sars/country/table2004\\_04\\_21/en/](https://www.who.int/csr/sars/country/table2004_04_21/en/).
- 880 5. WHO. MERS situation update November 2019. World Health Organization; 2019.
- 881 6. The L. COVID-19 vaccines: no time for complacency. The Lancet.  
882 2020;396(10263):1607.
- 883 7. Ledford H. US authorization of first COVID vaccine marks new phase in safety  
884 monitoring. Nature. 2020.
- 885 8. Azanza Ricardo CL, Hernandez Vargas EA. The Risk of Lifting COVID-19 Confinement  
886 in Mexico. medRxiv. 2020:2020.05.28.20115063.
- 887 9. Shuchman M. Low- and middle-income countries face up to COVID-19. Nature  
888 Medicine. 2020(26):986-8.
- 889 10. Barnett-Howell Z, Mobarak AM. Should Low-Income Countries Impose the Same Social  
890 Distancing Guidelines as Europe and North America to Halt the Spread of COVID-19? 2020  
891 [cited 2020 April 2]. Available from: [https://som.yale.edu/should-low-income-countries-impose-](https://som.yale.edu/should-low-income-countries-impose-the-same-social-distancing-guidelines-as-europe-and-north-america-to-halt-the-spread-of-covid-19)  
892 [the-same-social-distancing-guidelines-as-europe-and-north-america-to-halt-the-spread-of-covid-](https://som.yale.edu/should-low-income-countries-impose-the-same-social-distancing-guidelines-as-europe-and-north-america-to-halt-the-spread-of-covid-19)  
893 [19](https://som.yale.edu/should-low-income-countries-impose-the-same-social-distancing-guidelines-as-europe-and-north-america-to-halt-the-spread-of-covid-19).
- 894 11. Regmi K, Lwin CM. Impact of social distancing measures for preventing coronavirus  
895 disease 2019 [COVID-19]: A systematic review and meta-analysis protocol. medRxiv.  
896 2020:2020.06.13.20130294.
- 897 12. Statista. Number of people living in poverty in Mexico between 2008 and 2018(in  
898 millions) 2019 [cited 2019 July]. Available from:  
899 <https://www.statista.com/statistics/1039479/mexico-people-living-poverty/>.
- 900 13. Coneval. Poverty measurement, poverty measurement in Mexico 2020 [Available from:  
901 <https://www.coneval.org.mx/Medicion/Paginas/PobrezaInicio.aspx>.
- 902 14. Organization IL. Informal employment in Mexico: Current situation, policies and  
903 challenges. 2014.
- 904 15. MOH. Ministry of Health Mexico 2020 [Available from:  
905 <https://www.gob.mx/salud/documentos/datos-abiertos-152127>.
- 906 16. Clock WP. Mexico, Demographic data as of July 1, 2020, economic data for 2019 2020  
907 [Available from: <https://www.census.gov/popclock/world/mx>.
- 908 17. Young S. COVID-19 takes its toll on Mexico's health workers. The World. December 2.  
909 18. Agren D. Understanding Mexican health worker COVID-19 deaths. The Lancet.  
910 2020;396(10254):807.
- 911 19. Data OWi. Total COVID-19 tests per 1,000 people 2020 [Available from:  
912 [https://ourworldindata.org/grapher/full-list-cumulative-total-tests-per-thousand?time=2020-02-](https://ourworldindata.org/grapher/full-list-cumulative-total-tests-per-thousand?time=2020-02-21..latest&country=BRA~CHL~SLV~MEX~PER)  
913 [21..latest&country=BRA~CHL~SLV~MEX~PER](https://ourworldindata.org/grapher/full-list-cumulative-total-tests-per-thousand?time=2020-02-21..latest&country=BRA~CHL~SLV~MEX~PER).
- 914 20. Moreno T. Mexico's COVID-19 contingency plan: three key phases to fight the  
915 coronavirus outbreak  
916 . El Universal. 2020 March 14.

- 917 21. Drafting. There are 3 confirmed cases of coronavirus in Mexico. *El Financiero*. February  
918 28, 2020.
- 919 22. Expansion P. The Ministry of Health confirms the sixth case of coronavirus in Mexico.  
920 Political expansion. March 6, 2020.
- 921 23. Informer T. Massive Activities Due to Coronavirus Suspended. *InformadorMx*. March  
922 13, 2020.
- 923 24. Infobae. Coronavirus rushes ahead in Mexico and screening tests cost up to 18,000 pesos.  
924 Infobae. March 14, 2020.
- 925 25. Caicedo-Ochoa Y, Rebellón-Sánchez DE, Peñaloza-Rallón M, Cortés-Motta HF,  
926 Méndez-Fandiño YR. Effective Reproductive Number estimation for initial stage of COVID-19  
927 pandemic in Latin American Countries. *International Journal of Infectious Diseases*.  
928 2020;95:316-8.
- 929 26. Ibarra-Nava I, Cardenas-de la Garza JA, Ruiz-Lozano RE, Salazar-Montalvo RG. Mexico  
930 and the COVID-19 Response. *Disaster Medicine and Public Health Preparedness*.  
931 2020;14(4):e17-e8.
- 932 27. Cruz-Pacheco G, Bustamante-Castañeda JF, Caputo JG, Jiménez-Corona ME, Ponce-de-  
933 León-Rosales S. DISPERSION OF A NEW CORONAVIRUS SARS-COV-2 BY AIRLINES IN  
934 2020: TEMPORAL ESTIMATES OF THE OUTBREAK IN MEXICO. *Rev Invest Clin*.  
935 2020;72(3):138-43.
- 936 28. Suárez V, Suarez Quezada M, Oros Ruiz S, Ronquillo De Jesús E. Epidemiology of  
937 COVID-19 in Mexico: From the 27th of February to the 30th of April 2020. *Rev Clin Esp*  
938 (Barc). 2020;220(8):463-71.
- 939 29. Infobae. Micro-business credits and 500 pesos for children: CDMX's actions to support  
940 the population during a coronavirus emergency. *Infobae*. March 25, 2020.
- 941 30. Drafting. Mexico, in a health emergency; over a thousand cases of coronavirus.  
942 *El Universal*. March 30, 2020.
- 943 31. Fredrick J. 'If Coronavirus Doesn't Kill Me, Hunger Will': Mexico's Poor Bear Brunt Of  
944 Pandemic. *Npr*. 2020 July 30.
- 945 32. Wall SAA. Be okay with the "stay home". *Psico Grupo*; 2020 May 21.
- 946 33. AP. Mexico to restrict mobility to areas less affected by virus. *AP News*. April 16, 2020.
- 947 34. Universal E. Mexico enters Phase 3 of its contingency plan to fight COVID-19. *El*  
948 *Universal*. 2020 April 4.
- 949 35. Capistran MA, Capella A, Christen JA. Forecasting hospital demand in metropolitan  
950 areas during the current COVID-19 pandemic and estimates of lockdown-induced 2nd waves.  
951 *medRxiv*. 2020:2020.07.16.20155721.
- 952 36. Oré D. Exclusive: 'We're winning' - Mexico's coronavirus czar sees victory in sight.  
953 *Reuters*. 2020 May 5.
- 954 37. Ahmed A, Kurmanaev A, Politi D, Londoño E. Virus Gains Steam Across Latin  
955 America. *New York Times*. 2020 June 23.
- 956 38. Flores J. Did the mathematical model fail? *Nexos: Nexos*; 2020 [updated July 9].  
957 Available from: <https://datos.nexos.com.mx/?p=1485>.
- 958 39. Review TNL. Red, Orange, Yellow, Green—Go! Considerations for Reopening in  
959 Mexico: Social, Educational, and Economic Activities. *The National Law Review*. 2020 June 16.
- 960 40. Deakins O. Mexico's COVID-19 Traffic Light Monitoring System: News for August 17–  
961 30, 2020. *Ogletree Deakins*. 2020 August 21.

- 962 41. Chowell G, Hincapie-Palacio D, Ospina J, Pell B, Tariq A, Dahal S, et al. Using  
963 Phenomenological Models to Characterize Transmissibility and Forecast Patterns and Final  
964 Burden of Zika Epidemics. Public Library of Science Currents.  
965 2016;8:ecurrents.outbreaks.f14b2217c902f453d9320a43a35b583.
- 966 42. Pell B, Kuang Y, Viboud C, Chowell G. Using phenomenological models for forecasting  
967 the 2015 Ebola challenge. *Epidemics*. 2018;22:62-70.
- 968 43. IHME. COVID-19 Projections 2020 [updated June 10. Available from:  
969 <https://covid19.healthdata.org/mexico>.
- 970 44. Hay SI. COVID-19 scenarios for the United States. medRxiv.  
971 2020:2020.07.12.20151191.
- 972 45. Apple. Mobility Trends Reports Apple2020 [cited 2020. Available from:  
973 <https://covid19.apple.com/mobility>.
- 974 46. Shu Y, McCauley J. GISAID: Global initiative on sharing all influenza data - from vision  
975 to reality. *Euro surveillance : bulletin European sur les maladies transmissibles = European*  
976 *communicable disease bulletin*. 2017;22(13):30494.
- 977 47. Banda JM, Tekumalla R, Wang G, Yu J, Liu T, Ding Y, et al. A large-scale COVID-19  
978 Twitter chatter dataset for open scientific research -- an international collaboration. *ArXiv*. 2020.
- 979 48. Chowell G, Tariq A, Hyman JM. A novel sub-epidemic modeling framework for short-  
980 term forecasting epidemic waves. *BioMed Central Medicine*. 2019;17(1):164.
- 981 49. Shanafelt DW, Jones G, Lima M, Perrings C, Chowell G. Forecasting the 2001 Foot-and-  
982 Mouth Disease Epidemic in the UK. *Ecohealth*. 2018;15(2):338-47.
- 983 50. Roosa K, Lee Y, Luo R, Kirpich A, Rothenberg R, Hyman JM, et al. Short-term  
984 Forecasts of the COVID-19 Epidemic in Guangdong and Zhejiang, China: February 13-23, 2020.  
985 *Journal of clinical medicine*. 2020;9(2):596.
- 986 51. Torrealba-Rodríguez O, Conde-Gutiérrez RA, Hernández-Javier AL. Modeling and  
987 prediction of COVID-19 in Mexico applying mathematical and computational models. *Chaos*  
988 *Solitons Fractals*. 2020;138:109946-.
- 989 52. Richards FJ. A Flexible Growth Function for Empirical Use. *Journal of Experimental*  
990 *Botany*. 1959;10(2):290-301.
- 991 53. Banks HT, Hu S, Thompson WC. Modeling and inverse problems in the presence of  
992 uncertainty: CRC Press; 2014.
- 993 54. Mathworks. lhs design [Available from:  
994 <https://www.mathworks.com/help/stats/lhsdesign.html>.
- 995 55. Chowell G. Fitting dynamic models to epidemic outbreaks with quantified uncertainty: A  
996 primer for parameter uncertainty, identifiability, and forecasts. *Infectious Disease Modelling*.  
997 2017;2(3):379-98.
- 998 56. Roosa K, Luo R, Gerardo C. Comparative assessment of parameter estimation methods in  
999 the presence of overdispersion: a simulation study. *Mathematical Biosciences and Engineering*.  
1000 2019;16(5):4299-313.
- 1001 57. Roosa K, Chowell G. Assessing parameter identifiability in compartmental dynamic  
1002 models using a computational approach: application to infectious disease transmission models.  
1003 *Theoretical Biology and Medical Modelling*. 2019;16(1):1.
- 1004 58. M K, K. J. Applied predictive modeling. New York: Springer; 2013.
- 1005 59. Gneiting T, Raftery AE. Strictly Proper Scoring Rules, Prediction, and Estimation.  
1006 *Journal of the American Statistical Association*. 2007;102(477):359-78.
- 1007 60. Healy K. Apple's COVID Mobility Data. Github: Github; 2020.

- 1008 61. Chowell G, Abdirizak F, Lee S, Lee J, Jung E, Nishiura H, et al. Transmission  
1009 characteristics of MERS and SARS in the healthcare setting: a comparative study. *BioMed*  
1010 *Central Medicine*. 2015;13(1):210.
- 1011 62. Anderson RM, May RM. *Infectious Diseases of Humans*. Oxford, editor. Oxford  
1012 University Press 1991.
- 1013 63. Nishiura H, Chowell G, Heesterbeek H, Wallinga J. The ideal reporting interval for an  
1014 epidemic to objectively interpret the epidemiological time course. *J R Soc Interface*.  
1015 2010;7(43):297-307.
- 1016 64. Viboud C, Simonsen L, Chowell G. A generalized-growth model to characterize the early  
1017 ascending phase of infectious disease outbreaks. *Epidemics*. 2016;15:27-37.
- 1018 65. Ganyani T, Kremer C, Chen D, Torneri A, Faes C, Wallinga J, et al. Estimating the  
1019 generation interval for coronavirus disease (COVID-19) based on symptom onset data, March  
1020 2020. *Eurosurveillance*. 2020;25(17):2000257.
- 1021 66. Nishiura H, Chowell G. Early transmission dynamics of Ebola virus disease (EVD), West  
1022 Africa, March to August 2014. *Euro surveillance : bulletin European sur les maladies*  
1023 *transmissibles = European communicable disease bulletin*. 2014;19(36).
- 1024 67. H. Nishiura GC. The Effective Reproduction Number as a Prelude to Statistical  
1025 Estimation of Time-Dependent Epidemic Trends. Springer D, editor 2009. 103-12 p.
- 1026 68. Paine S, Mercer G, Kelly P, Bandaranayake D, Baker M, Huang Q, et al. Transmissibility  
1027 of 2009 pandemic influenza A(H1N1) in New Zealand: effective reproduction number and  
1028 influence of age, ethnicity and importations. *Euro surveillance : bulletin European sur les*  
1029 *maladies transmissibles = European communicable disease bulletin*. 2010;15(24).
- 1030 69. Fraser C. Estimating Individual and Household Reproduction Numbers in an Emerging  
1031 Epidemic. *PLOS ONE*. 2007;2(8):e758.
- 1032 70. Chong KC, Zee BCY, Wang MH. Approximate Bayesian algorithm to estimate the basic  
1033 reproduction number in an influenza pandemic using arrival times of imported cases. *Travel*  
1034 *medicine and infectious disease*. 2018;23:80-6.
- 1035 71. He X, Lau EHY, Wu P, Deng X, Wang J, Hao X, et al. Temporal dynamics in viral  
1036 shedding and transmissibility of COVID-19. *Nature Medicine*. 2020;26(5):672-5.
- 1037 72. Wallinga J, Teunis P. Different Epidemic Curves for Severe Acute Respiratory Syndrome  
1038 Reveal Similar Impacts of Control Measures. *American Journal of Epidemiology*.  
1039 2004;160(6):509-16.
- 1040 73. Cori A, Ferguson NM, Fraser C, Cauchemez S. A New Framework and Software to  
1041 Estimate Time-Varying Reproduction Numbers During Epidemics. *American Journal of*  
1042 *Epidemiology*. 2013;178(9):1505-12.
- 1043 74. Wu F, Zhao S, Yu B, Chen Y-M, Wang W, Hu Y, et al. Complete genome  
1044 characterisation of a novel coronavirus associated with severe human respiratory disease in  
1045 Wuhan, China. *bioRxiv*. 2020:2020.01.24.919183.
- 1046 75. Edgar RC. MUSCLE: multiple sequence alignment with high accuracy and high  
1047 throughput. *Nucleic Acids Res*. 2004;32(5):1792-7.
- 1048 76. Stamatakis A. RAXML version 8: a tool for phylogenetic analysis and post-analysis of  
1049 large phylogenies. *Bioinformatics*. 2014;30(9):1312-3.
- 1050 77. Suchard MA, Lemey P, Baele G, Ayres DL, Drummond AJ, Rambaut A. Bayesian  
1051 phylogenetic and phylodynamic data integration using BEAST 1.10. *Virus Evol*.  
1052 2018;4(1):vey016.



- 1053 78. Li Q, Guan X, Wu P, Wang X, Zhou L, Tong Y, et al. Early Transmission Dynamics in  
1054 Wuhan, China, of Novel Coronavirus–Infected Pneumonia. *New England Journal of Medicine*.  
1055 2020.
- 1056 79. Srivastava A, Chowell G. Understanding Spatial Heterogeneity of COVID-19 Pandemic  
1057 Using Shape Analysis of Growth Rate Curves. *medRxiv*. 2020:2020.05.25.20112433.
- 1058 80. Srivastava A, Chowell G. Understanding Spatial Heterogeneity of COVID-19 Pandemic  
1059 Using Shape Analysis of Growth Rate Curves. *medRxiv*.
- 1060 81. Srivastava A, Klassen EP. *Functional and shape data analysis*: Springer; 2016.
- 1061 82. Alliance DP. C-19 Global South observatory Mexico 2020 [Available from:  
1062 <https://datapopalliance.org/covid19/c19globalsouthobservatory/mexico/>].
- 1063 83. Chowell G, Viboud C, Hyman JM, Simonsen L. The Western Africa ebola virus disease  
1064 epidemic exhibits both global exponential and local polynomial growth rates. *PLoS currents*.  
1065 2015;7.
- 1066 84. Mendoza CI. Inhomogeneous mixing and asynchronic transmission between local  
1067 outbreaks account for the spread of COVID-19 epidemics. *medRxiv*.  
1068 2020:2020.08.04.20168443.
- 1069 85. Tariq A, Undurraga EA, Laborde CC, Vogt-Geisse K, Luo R, Rothenberg R, et al. Early  
1070 transmission dynamics of COVID-19 in Chile: From sub-exponential ascending growth  
1071 dynamics to a stationary disease wave, March-April, 2020. *medRxiv*.  
1072 2020:2020.05.15.20103069.
- 1073 86. Anzarut M, González LF, Mendizábal S, Ortiz MT. Estimating COVID-19 cases and  
1074 reproduction number in Mexico. *Arxiv*. 2020.
- 1075 87. Canals M, Cuadrado C, Canals A, Yohannessen K, Lefio LA, Bertoglia MP, et al.  
1076 Epidemic trends, public health response and health system capacity: the Chilean experience in  
1077 four months of the COVID-19 pandemic. *Rev Panam Salud Publica*. 2020;44:e99-e.
- 1078 88. Munayco CV, Tariq A, Rothenberg R, Soto-Cabezas GG, Reyes MF, Valle A, et al. Early  
1079 transmission dynamics and control of COVID-19 in a southern hemisphere setting: Lima-Peru,  
1080 February 29th-March 30th, 2020. *medRxiv*. 2020:2020.04.30.20077594.
- 1081 89. Acuña-Zegarra MA, Santana-Cibrian M, Velasco-Hernandez JX. Modeling behavioral  
1082 change and COVID-19 containment in Mexico: A trade-off between lockdown and compliance.  
1083 *Math Biosci*. 2020;325:108370-.
- 1084 90. News T. Mexico, the Latin American country that least respects “stay at home”: mobility  
1085 report. *Televisa News*. 2020 April 7.
- 1086 91. Rueters T. Mexico officials says coronavirus cases are on a 'sustained decline'. *Rueters*.  
1087 2020 August 19.
- 1088 92. AP. Mexico reported 193,170 “excess deaths” through Sept 26. *AP*. 2020 October 25.
- 1089 93. Flannery NP. Why Are So Many People Dying Of Covid-19 In Mexico? *Forbes*. 2020  
1090 September 3.
- 1091 94. Mahase E. Covid-19: Deaths in Mexico triple since reopening began in June. *BMJ*.  
1092 2020;370:m2753.
- 1093 95. Daily MN. Covid deaths to stabilize in September, says Mexico City health minister.  
1094 *Mexico News Daily*. 2020 September 30.
- 1095 96. News B. Coronavirus: Mexico's death toll passes 30,000. *BBC News*. 2020 July 5.
- 1096 97. Gu Y. COVID-19 Projections Using Machine Learning 2020 [Available from:  
1097 <https://covid19-projections.com/mexico>].  
1098

1099  
1100

1101

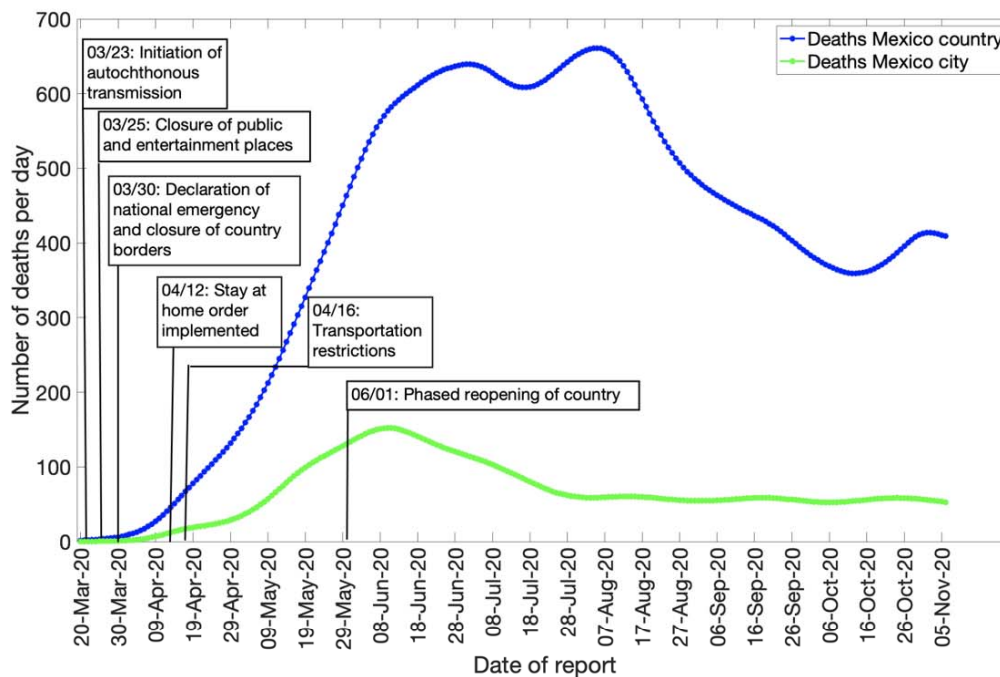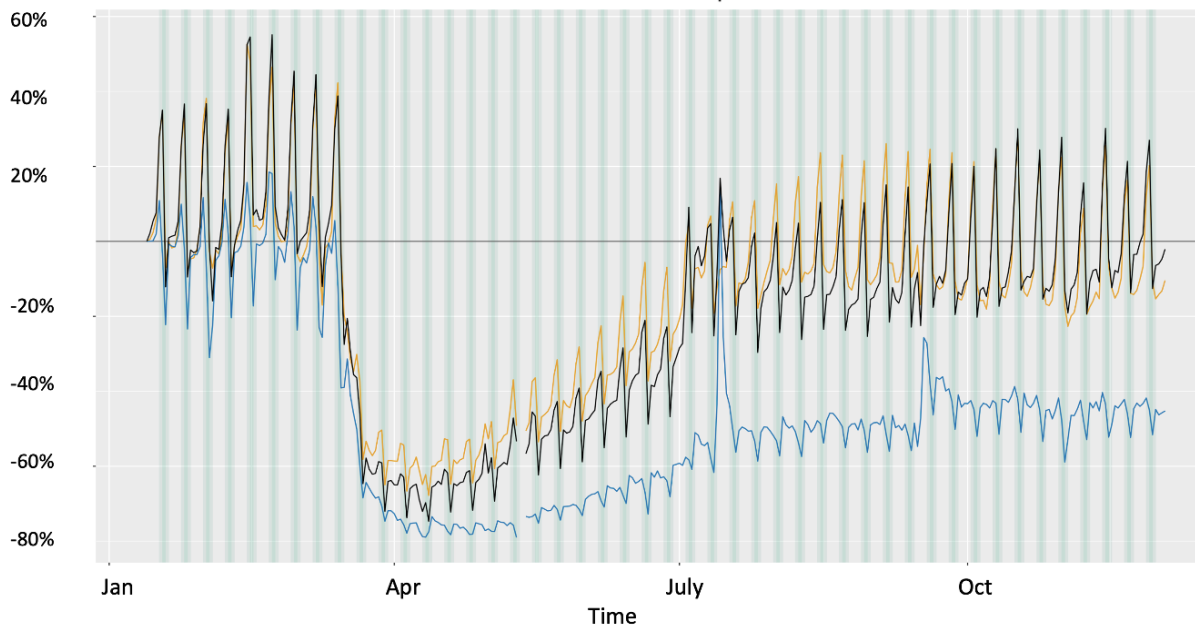

1102

1103 Fig 1: Upper panel: Epidemic curve for the COVID-19 deaths in Mexico and Mexico City from  
1104 March 20-November 11, 2020. Blue line depicts the confirmed deaths in Mexico and green line  
1105 depicts the confirmed deaths in Mexico City.  
1106 Lower panel: The mobility trends for Mexico. Orange line shows the driving trend, blue line  
1107 shows the transit trend and the black line shows the walking trend.

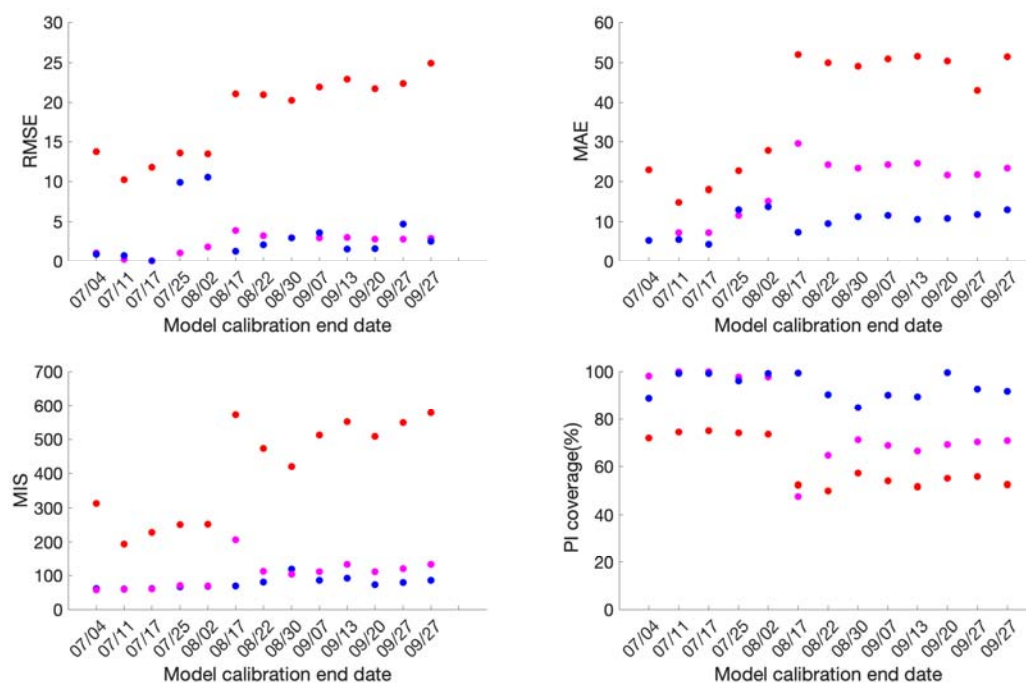

1108  
1109  
1110 Fig 2: Calibration performance for each of the thirteen sequential calibration phases for GLM  
1111 (magenta), Richards (red) and sub-epidemic (blue) model for Mexico. High 95% PI coverage  
1112 and lower mean interval score (MIS), root mean square error (RMSE) and mean absolute error  
1113 (MAE) indicate better performance.  
1114



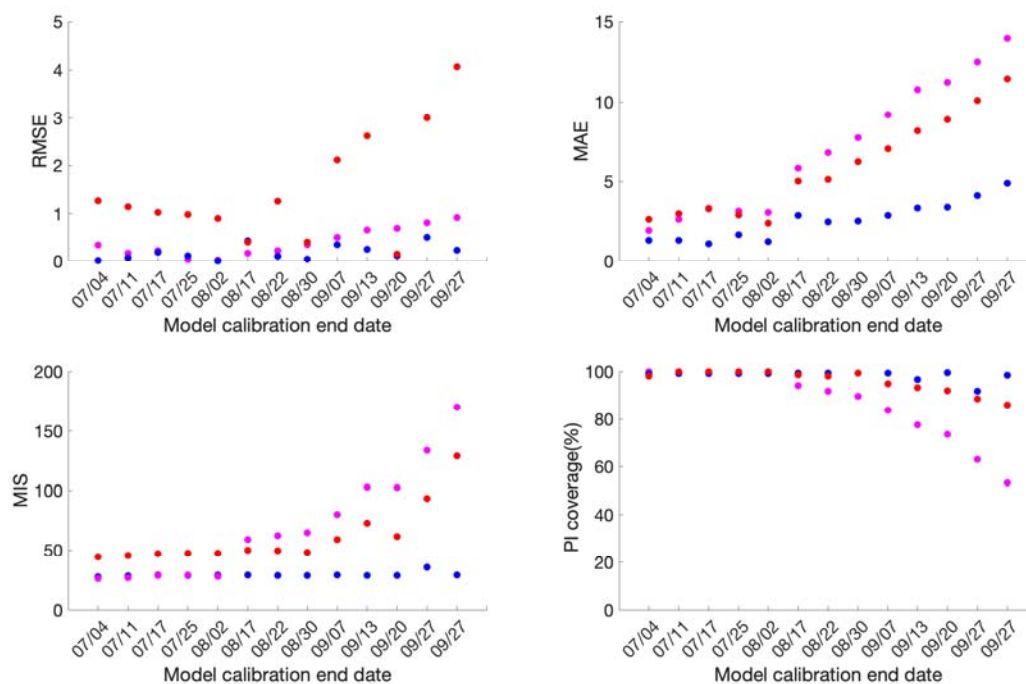

1115

1116 Fig 3: Calibration performance for each of the thirteen sequential calibration phases for GLM  
1117 (magenta), Richards (red) and sub-epidemic (blue) model for Mexico City. High 95% PI  
1118 coverage and lower mean interval score (MIS), root mean square error (RMSE) and mean  
1119 absolute error (MAE) indicate better performance.

1120

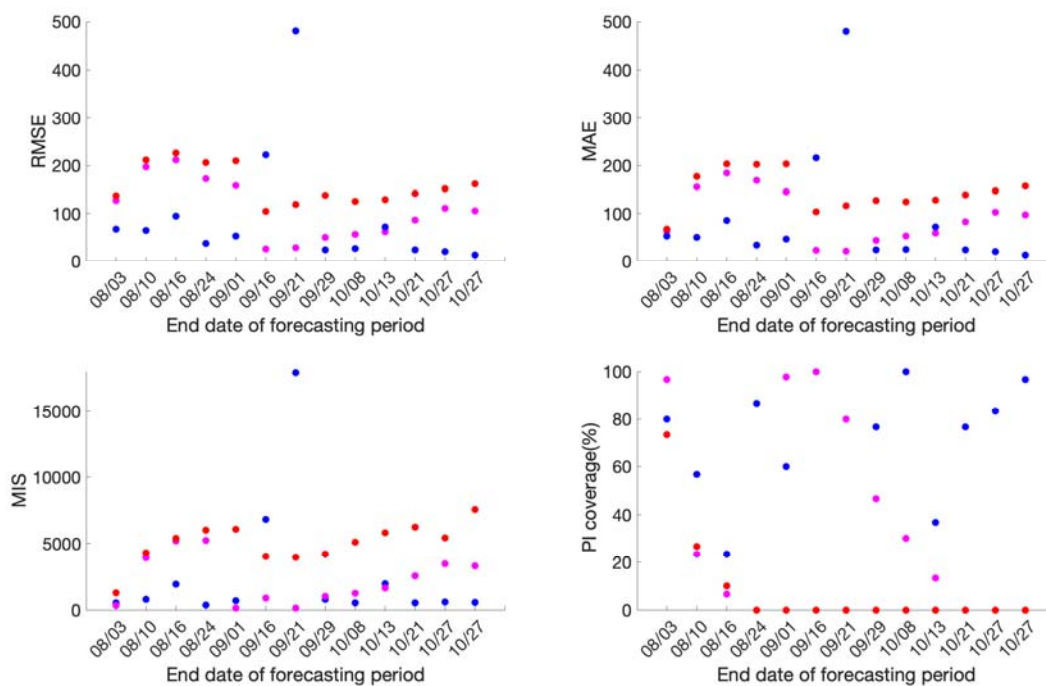

1121

1122

1123 Fig 4: Forecasting period performance metrics for each of the thirteen sequential forecasting  
1124 phases for GLM (magenta), Richards (red) and sub-epidemic (blue) model for Mexico. High  
1125 95% PI coverage and lower mean interval score (MIS), root mean square error (RMSE) and  
1126 mean absolute error (MAE) indicate better performance.

1127

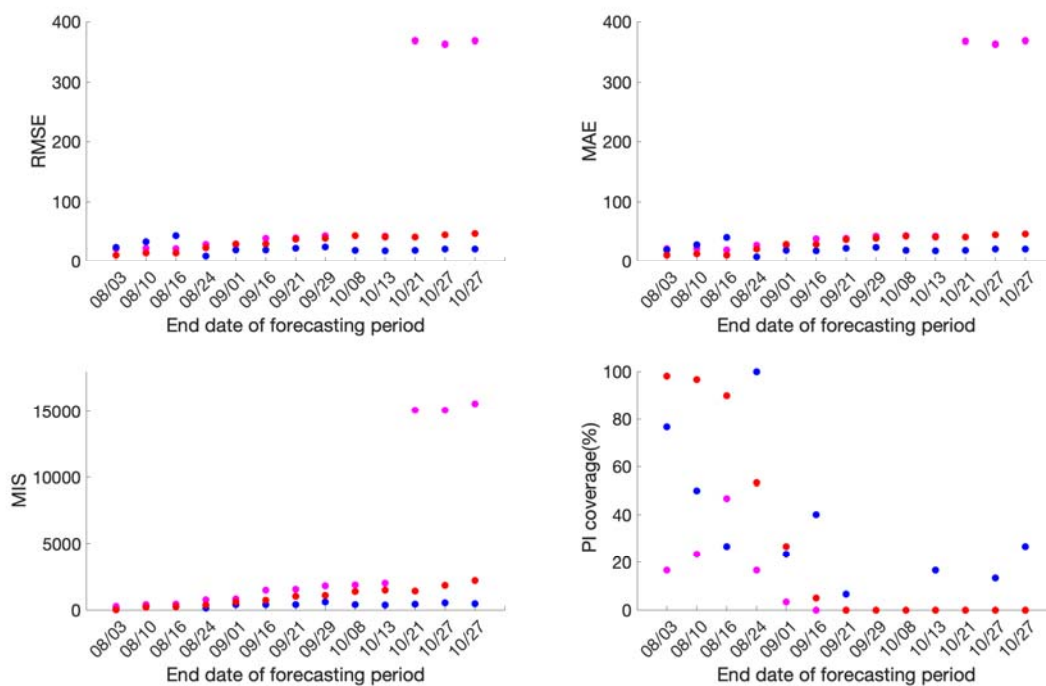

1128

1129

1130 Fig 5: Forecasting period performance metrics for each of the thirteen sequential forecasting

1131 phases for GLM (magenta), Richards (red) and sub-epidemic (blue) model for the Mexico City.

1132 High 95% PI coverage and lower mean interval score (MIS), root mean square error (RMSE) and

1133 mean absolute error (MAE) indicate better performance.

1134

1135

1136

1137

1138

1139

1140

1141

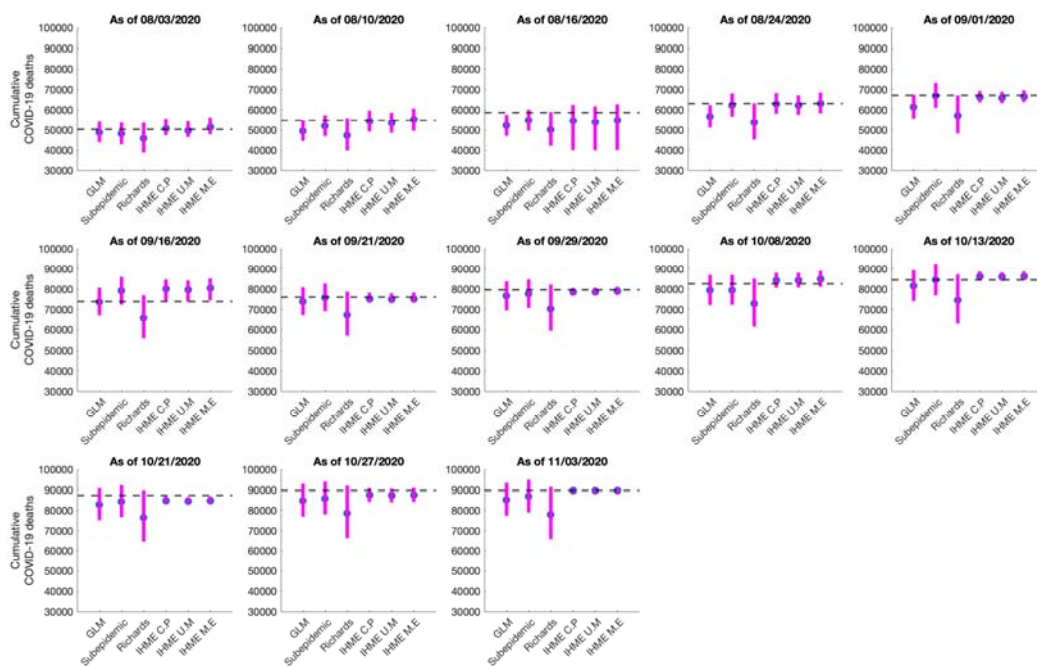

1142

1143

1144 Fig 6: Systematic comparison of the six models (GLM, Richards, sub-epidemic model, IHME  
1145 current projections (IHME C.P), IHME universal masks (IHME U.M) and IHME mandates  
1146 easing (IHME M.E)) to predict the cumulative COVID-19 deaths for Mexico in the thirteen  
1147 sequential forecasts. The blue circles represent the mean deaths and the magenta vertical line  
1148 indicates the 95% PI around the mean death count. The horizontal dashed line represents the  
1149 actual death count reported by that date in the November 11, 2020 IHME estimates files.

1150

1151

1152

1153 5

1154

1155

1156

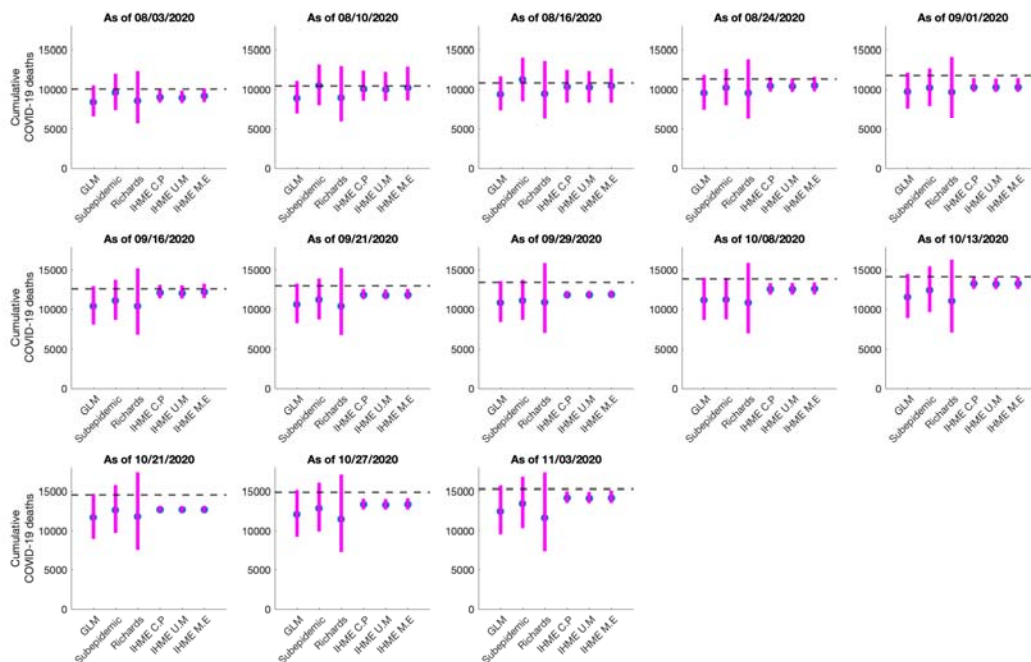

1157

1158 Fig 7: Systematic comparison of the six (GLM, Richards, sub-epidemic model, IHME current  
1159 projections (IHME C.P), IHME universal masks (IHME U.M) and IHME mandates easing  
1160 (IHME M.E))to predict the cumulative COVID-19 deaths for the Mexico City in the thirteen  
1161 sequential forecasts. The blue circles represent the mean deaths and the magenta vertical line  
1162 indicates the 95% PI around the mean death count. The horizontal dashed line represents the  
1163 actual death count reported by that date in the November 11, 2020 IHME estimates files.

1164

1165

1166

1167

1168

1169

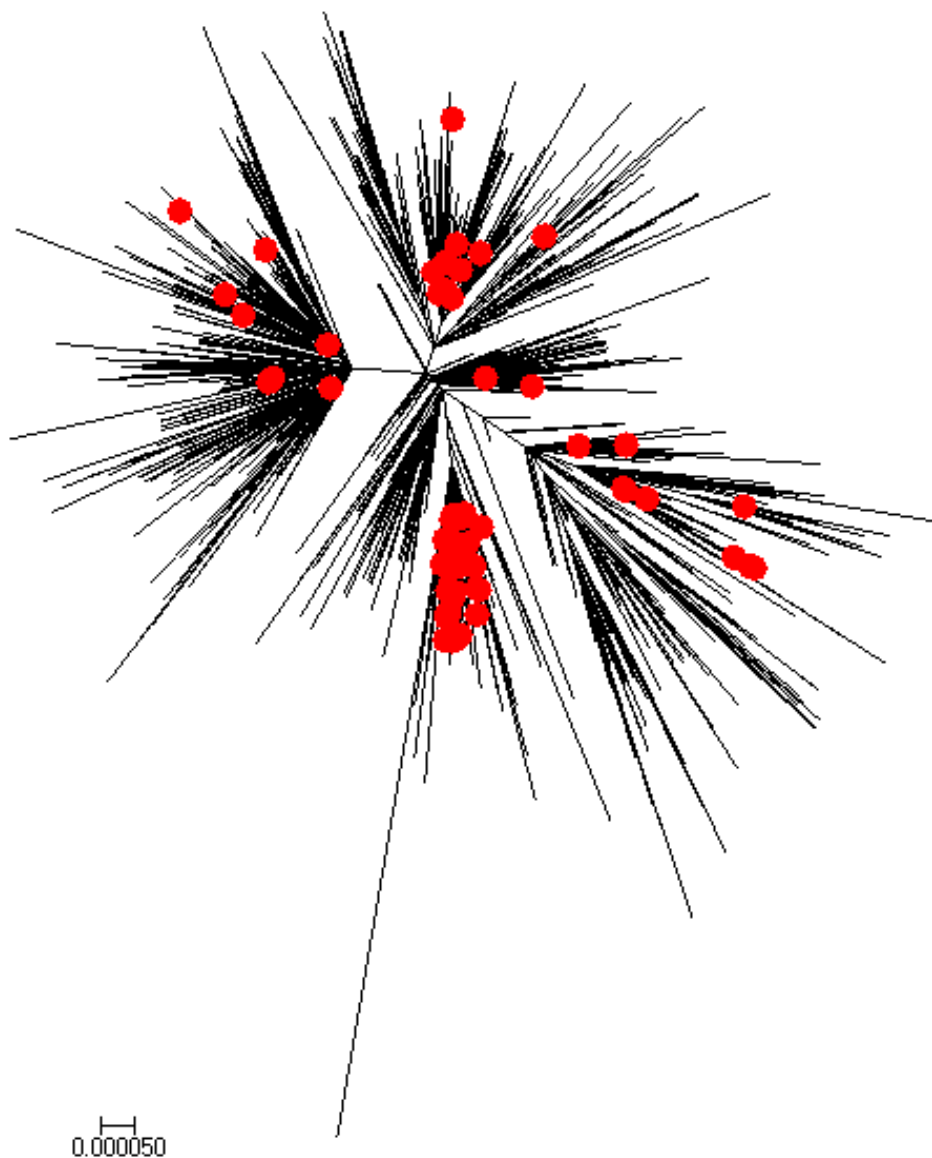

1170

1171

1172

1173

1174 Fig 8: Global neighbor-joining tree for SARS-CoV-2 genomic data from February 27- May 29,

1175 2020 . Sequences sampled in Mexico are highlighted in red.

1176

1177

1178

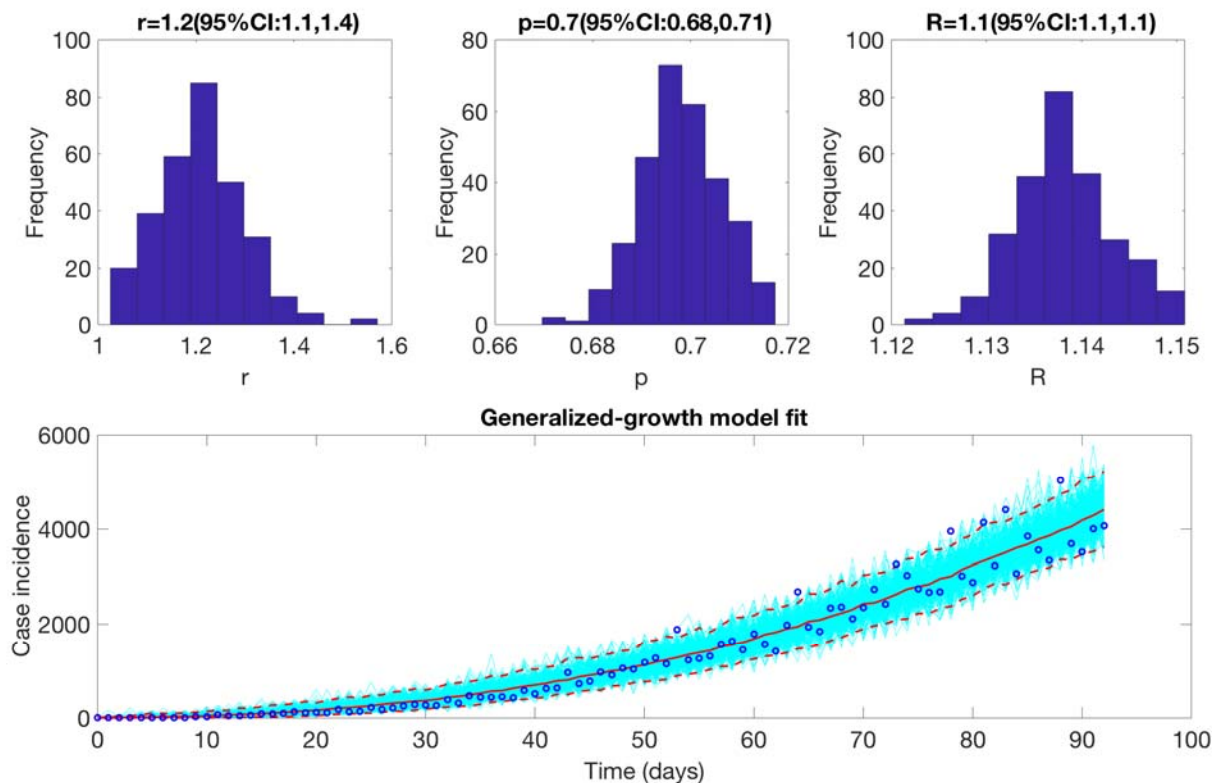

1179

1180 Fig 9: Upper panel: Reproduction number with 95% CI estimated using the GGM model. The estimated  
1181 reproduction number of the COVID-19 epidemic in Mexico as of May 29, 2020, 2020 is 1.1 (95% CI:  
1182 1.1, 1.1). The growth rate parameter,  $r$ , is estimated at 1.2(95%CI: 1.1, 1.4) and the deceleration of growth  
1183 parameter,  $p$ , is estimated at 0.7 (95%CI:0.68, 0.71).

1184 Lower panel: The lower panel shows the GGM fit to the case incidence data for the first 90 days.

1185

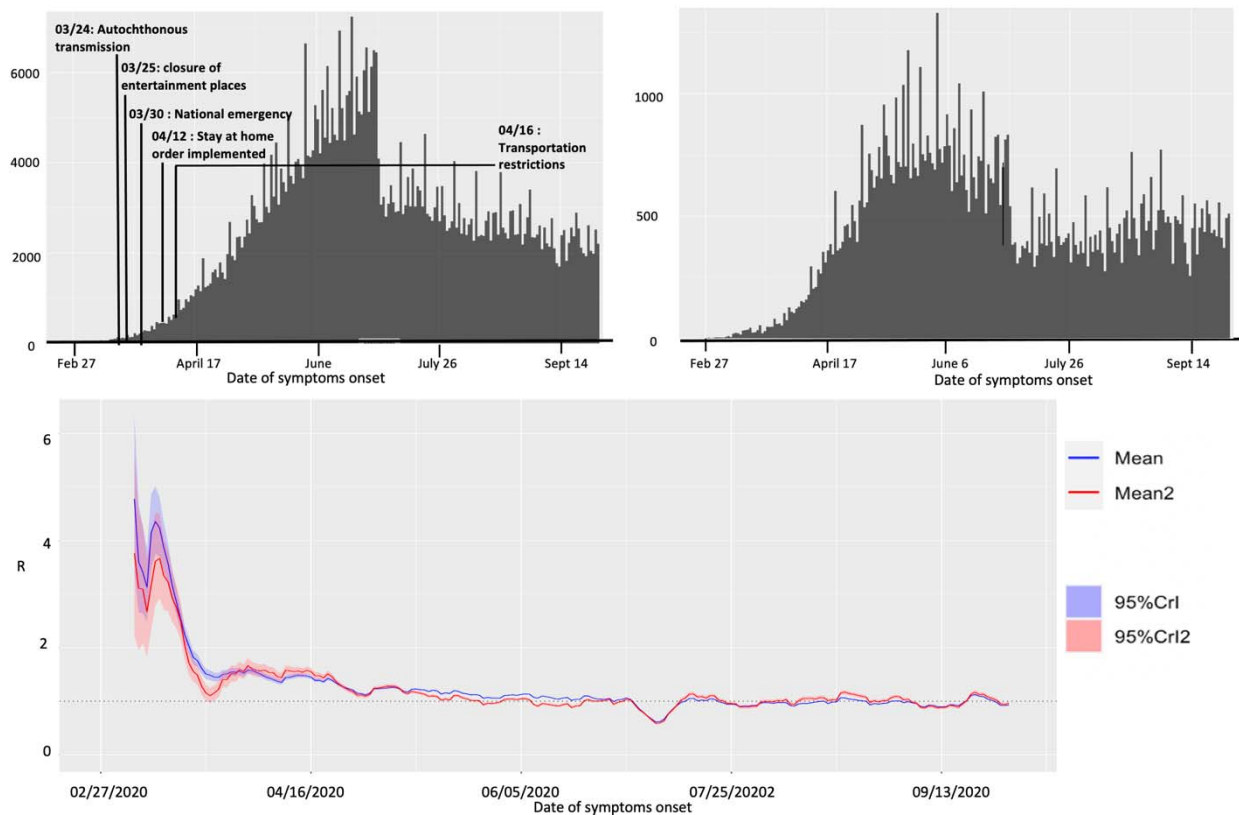

1186

1187 Fig 10: Upper panel: Epidemiological curve (by the dates of symptom onset) for Mexico (left  
1188 panel) and Mexico City (right panel) as of September 27, 2020.

1189 Lower panel: Instantaneous reproduction number with 95% credible intervals for the COVID-19  
1190 epidemic in Mexico as of September 27, 2020. The red solid line represents the mean  
1191 reproduction number for Mexico and the red shaded area represents the 95% credible interval  
1192 around it. The blue solid line represents the mean reproduction number for the Mexico City and  
1193 the blue shaded region represents the 95% credible interval around it.

1194

1195

1196

1197

1198



1199

1200

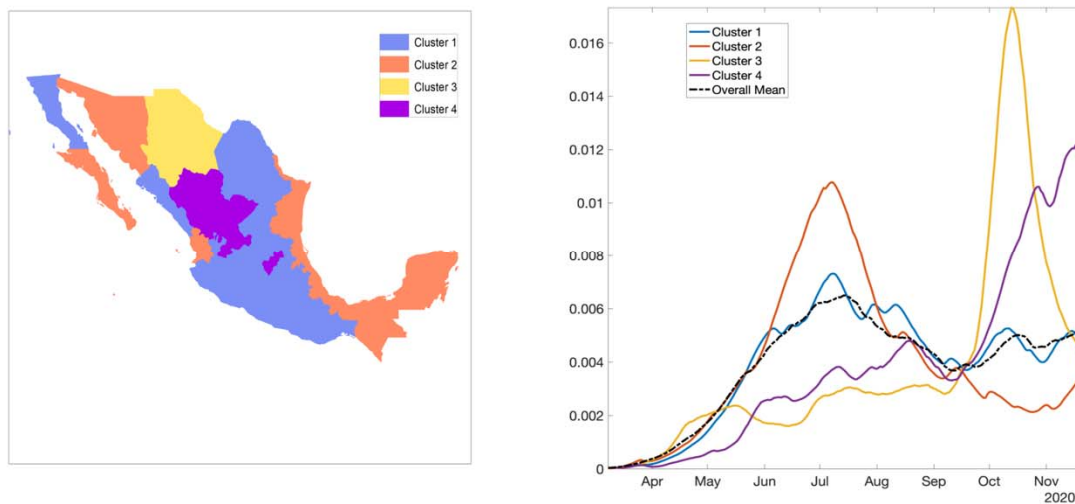

1201

1202

1203

1204 Fig 11: Clusters of states by their growth rates. Cluster 1 in blue, cluster 2 in orange, cluster 3 in  
1205 yellow, and cluster 4 in purple. The right panel shows the average growth rate curves for each  
1206 cluster (solid curves) and their overall average (black broken curve).

1207

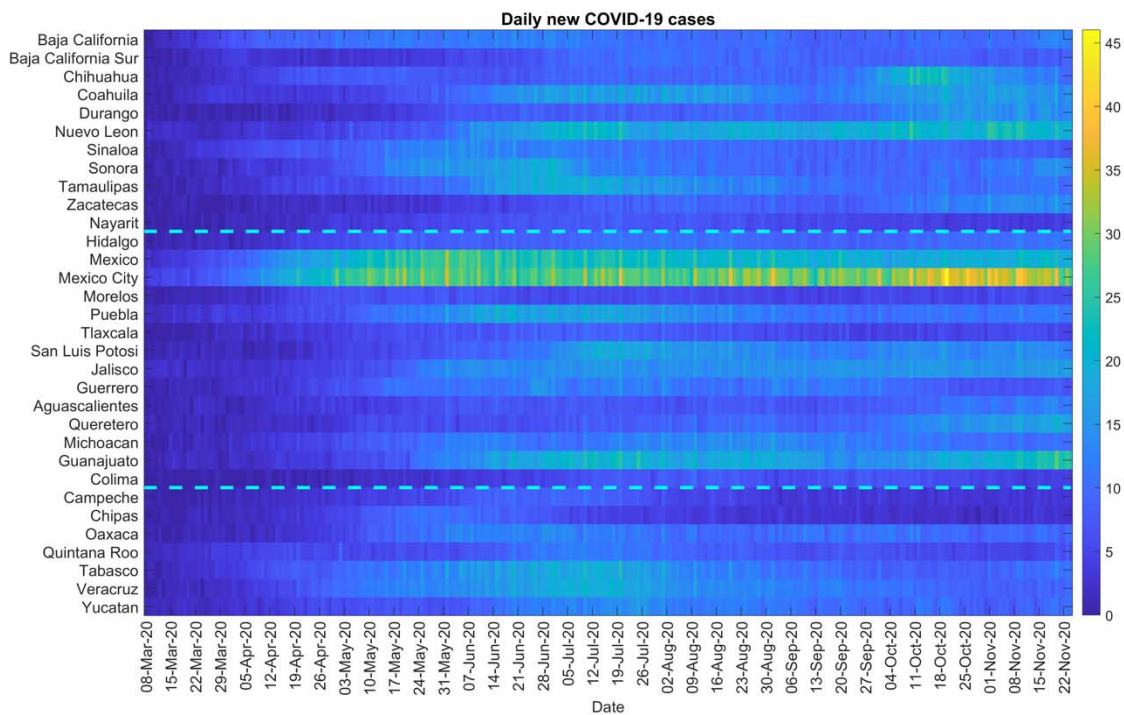

1208

1209

1210

1211 Fig 12: Color scale image of daily COVID-19 cases by region.

1212

1213

1214

1215

1216

1217

1218

1219

1220
